# Supplementary material for: Tropical marine sciences: Knowledge production in a web of path dependencies
Source: PLoS One. 2020 Feb 6;15(2):e0228613. doi: 10.1371/journal.pone.0228613 (PMC7004553; doi:10.1371/journal.pone.0228613)
Supplement: S5 Data — (CSV) [file pone.0228613.s005.csv]

	First_author_last_name	Year	ID	PDF_name	Title.x	Title.y	Abstract	Single_Author	Domestic_collab	International_collab	Sum	Research_region	Research_country	PDF_name.1	Number.of.authors	First_author_region	X1st.author	X2nd.author	X3rd.author	X4th.author	X5th.author	X6th.author	X7th.author	X8th.author	X9th.author	X10th.author	X11th.author	X12th.author	X13th.author	X14th.author	X15th.author	X16th.author	X17th.author	X18th.author	X19th.author	X20th.author	X21st.author	X22nd.author	X23rd.author	X24th.author	X25th.author	X26th.author	X27th.author	X28th.author	X29th.author	X30th.author	X31st.author	X32nd.author	X33rd.author
331	Davey	2014	1	00049182%2E2014%2E899025.pdf	The Great Barrier Reef World Heritage Marine Protected Area: valuing local perspectives in environmental protection	The Great Barrier Reef World Heritage Marine Protected Area: valuing local perspectives in environmental protection	The Great Barrier Reef (GBR), Queensland, Australia, is one of the most recognisable coral reefs in the world. In 1981 the reef was listed on the World Heritage List, to be preserved as an environmental asset of global significance for all people in perpetuity. The GBR is also a landmark Marine Protected Area (MPA) under the World Heritage Marine Programme. Yet management of this iconic property …	0	1	0	1	Australia and NZ	NA	00049182%2E2014%2E899025.pdf	2	Australia and NZ	Australia	Australia
1253	Trist	2010	2	0033-0124%2E00173.pdf	Recreating Ocean Space: Recreatiol Consumption and Representation of the Caribbean Marine Environment	NA	This paper investigates the historical relationship between the development of marine-based tourism and representations of marine space. Over the past 100 years, the Caribbean Sea has been transformed from a transportation surface connecting exotic ports of call into a commodity itself. Imagined by early travelers as a two-dimensional space to be crossed, the Caribbean has became part of a new tr…	1	0	0	1	Caribbean	NA	0033-0124%2E00173.pdf	1	North America	USA
543	Gullstr_m	2002	3	0044-7447-31%2E7%2E588.pdf	Seagrass 4s in the Western Indian Ocean	NA	Seagrasses are marine angiosperms widely distributed in both tropical and temperate coastal waters creating one of the most productive aquatic ecosystems on earth. In the Western Indian Ocean (WIO) region, with its 13 reported seagrass species, these ecosystems cover wide areas of near-shore soft bottoms through the 12 000 km coastline. Seagrass beds are found intertidally as well as subtidally, …	0	0	1	1	Eastern Africa	NA	0044-7447-31%2E7%2E588.pdf	8	Europe	Sweden	Sweden	Mozambique	Sweden	Sweden	Sweden	Sweden	Sweden
899	Munro	2009	4	00908329009545938.pdf	Extended jurisdiction and the magement of Pacific highly migratory species	NA	The Pacific region is the most important producer of tropical tuna in the world. Three subregions account for the production: Pacific Latin America, the Pacific Islands region, and Southeast Asia. Prior to the UN Third Conference on the Law of the Sea, the tuna fisheries in the subregions were the preserve of developed distant water fishing nations. The situation has now been entirely reversed, w…	1	0	0	1	Pacific Islands	NA	00908329009545938.pdf	1	North America	Canada
294	Cortez	2010	5	01_Cortes_Coral_Reefs_CR.pdf	Monitoring coral reefs, seagrasses and mangroves in Costa Rica	NA	The CARICOMP site at Puerto Morelos, Mexico was monitored from 1993 to 2005. No significant changes in air temperature, wind patterns, periodicity and quantity of rainfall, sea-surface temperature and water transparency were observed between sampling years. During the study four hurricane impacts were registered. At the coral reef site overall mean cover of fleshy algae (47%) and turf algae (36%)…	0	0	1	1	Central America	NA	01_Cortes_Coral_Reefs_CR.pdf	8	Central America	Costa Rica	Costa Rica	USA	Costa Rica	Costa Rica	Costa Rica	Costa Rica	Costa Rica
681	Kikuchi	2010	6	01-Kikuchi-Reefs-Brazil.pdf	Conservation status and spatial patterns of AGRRA vitality indices in Southwestern Atlantic Reefs	Conservation status and spatial patterns of AGRRA vitality indices in Southwestern Atlantic reefs	Coral reefs along the Eastern Brazilian coast extend for a distance of 800km from 12° to 18°S. They are the largest and the richest reefs of Brazil coasts, and represent the Southernmost coral reefs of the Southwestern Atlantic Ocean. Few reef surveys were performed in the 90s in reef areas of Bahia State, particu­larly in the Abrolhos reef complex, in the Southernmost side of the state. A monit…	0	1	0	1	South America	NA	01-Kikuchi-Reefs-Brazil.pdf	3	South America	Brazil	Brazil	Brazil
1097	Rodrêguez-Martênez	2010	7	02_Rodriguez_CARICOMP_Site_Mexico.pdf	Environmental state and tendencies of the Puerto Morelos CARICOMP site, Mexico	NA	The CARICOMP site at Puerto Morelos, Mexico was monitored from 1993 to 2005. No significant changes in air temperature, wind patterns, periodicity and quantity of rainfall, sea-surface temperature and water transparency were observed between sampling years. During the study four hurricane impacts were registered. At the coral reef site overall mean cover of fleshy algae (47%) and turf algae (36%)…	0	1	0	1	Central America	NA	02_Rodriguez_CARICOMP_Site_Mexico.pdf	7	Central America	Mexico	Mexico	Mexico	Mexico	Mexico	Mexico	Mexico
354	DHARANIRAJAN	2010	8	02030707-Remote-Sensing-and-GIS-for-the-Study-of-Coastal-Ecosystem-Changes-and-its-Conservation.pdf	Remote Sensing and GIS for the Study of Coastal 4 Changes and its Conservation	NA	Remote sensing and GIS techniques are useful to provide practical and costefficient output for environmental protection and management that can be used easily operated and maintained. The present study was carried out to delineate and characterize the coastal ecosystem changes using IRS-1B 1993 and IRS-1D LISS III 2003. The changes in the coastal sensitive areas such as sandy beaches, coral reefs…	0	1	0	1	Southwest Asia	NA	02030707-Remote-Sensing-and-GIS-for-the-Study-of-Coastal-Ecosystem-Changes-and-its-Conservation.pdf	5	Southwest Asia	India	India	India	India	India
475	Gayle	2010	9	04_Gayle_CARICOMP_Site_Jamaica.pdf	The Jamaican CARICOMP Site: using a temporal data set to assist in maging coastal resources	The Jamaican CARICOMP Site: Using a temporal data set to assist in managing coastal resources	Discovery Bay is one of nine sites around Jamaicas coastline, soon to gain the legislative protection of Fish Sanctuary (and Scientific Reserve) status. Cumulative natural and anthropogenic impacts drove the 1980s coral to algae phase shift. Discovery Bay CARICOMP data (1994 to 2007) showed an increase in coral cover from less than 5% reported in the mid 1980s to 11.7±0.31% (mean±SE) despite c…	0	0	1	1	Caribbean	NA	04_Gayle_CARICOMP_Site_Jamaica.pdf	4	Caribbean	Jamaica	Canada	Jamaica	France
471	Garzãn-Ferreira	2009	10	04-Garzon-CIMAC.pdf	SIMAC: Development and implementation of a coral reef monitoring network in Colombia	NA	Significant coral reef decline has been observed in Colombia during the last three decades. However, due to the lack of monitoring activities, most of the information about health and changes was fragmentary or inadequate. To develop an expanded nation-wide reef-monitoring program, in 1998 INVEMAR (Instituto de Investigaciones Marinas y Costeras: Colombian Institute of Marine and Coastal Researc…	0	0	1	1	Central America	NA	04-Garzon-CIMAC.pdf	2	South America	Colombia	USA
935	Ogden	2010	11	05_Ogden_Marine_Spatial_Planning.pdf	Marine spatial planning (MSP): A first step to ecosystem-based magement (EBM) in the Wider Caribbean	Marine spatial planning (MSP): A first step to ecosystem-based management (EBM) in the Wider Caribbean	The rapid decline of coastal ecosystems of the Wider Caribbean is entering its fifth decade. Some of the best science documenting this decline and its causes has been done by the laboratories of the Association of Marine Laboratories of the Caribbean (AMLC). Alarmed at the trends, Caribbean conservation pioneers established marine protected areas (MPAs) which spread throughout the region. Unfortu…	1	0	0	1	Caribbean	NA	05_Ogden_Marine_Spatial_Planning.pdf	1	North America	USA
1374	Yue	2011	12	0c960526884b39af99000000.pdf	Ecological-sedimentary zotions and carbote deposition, Xiaodonghai Reef Flat, Sanya, Hain Island, Chi	NA	Modern fringing reefs are developed on the intertidal to subtidal area of Xiaodonghai bay, Sanya, Hainan Island. The reef flat extends several dozen meters toward the sea. Various ecological and sedimentary zonations can be distinguished, including, from land to sea, beachrocks, large massive corals, inner reef flat, outer reef flat, and fore-reef slope. The carbonate sediments and constituent he…	0	1	0	1	East Asia	NA	0c960526884b39af99000000.pdf	3	East Asia	China	China	China
982	Pati	2015	13	1 Pati Rao.pdf	1 and temporal changes in biofouling community structure at Visakhapatm harbour, east coast of India	Spatial and temporal changes in biofouling community structure at Visakhapatnam harbour, east coast of India	Biofouling on wooden harbour structures and fishing craft causes huge economic losses. The magnitude of biofouling is often high in tropical countries due to the influence of high temperature on early recruitment of multiple species and the high abundance of biofoulers throughout the year. In the disturbed regions such as Visakhapatnam harbour, India, the biofouling community has undergone drasti…	0	1	0	1	Southwest Asia	NA	1 Pati Rao.pdf	3	Southwest Asia	India	India	India
458	Gable	1991	14	1-s2.0-001671859190021H-main.pdf	Global Environmental Change Issues in the Western Indian Ocean Region	Global environmental change issues in the Western Indian Ocean region	Mounting evidence from both instrumental and proxy records shows global climate continues to change. Analysis of near-surface temperatures over land and oceans during the past 130 years shows marked warming during the first half of this century with relatively steady temperatures through the mid-1970s followed by a rapid warming during the 1980s. The source of this warming is unclear at present. …	0	1	0	1	Eastern Africa	NA	1-s2.0-001671859190021H-main.pdf	3	North America	USA	USA	USA
790	Mallik	1979	15	1-s2.0-0025322779901178-main.pdf	SOME SEDIMENTOLOGICAL AND BIOLOGICAL ASPECTS OF THE KAVARATTI AND KALPENI ATOLLS, LAKSHADWEEP, ARABIAN SEA, INDIAN OCEAN*	Some sedimentological and biological aspects of the Kavaratti and Kalpeni atolls, Lakshadweep, Arabian Sea, Indian Ocean	Kavaratti and Kaipeni are important atolls of the Lakshadweep group, situated some 300 km off the west coast of India. The reefs enclose lagoons and islands. These atolls have developed on the Chagos Lakshadweep ridge during several sea-level changes which caused colonization of various coral communities belonging to different families of Acroporidae, Poritidae, Pocilloporidae, Favidae, Fungiidae…	1	0	0	1	Southwest Asia	NA	1-s2.0-0025322779901178-main.pdf	1	Southwest Asia	India
176	Braithwiate	1982	16	1-s2.0-0025322782901165-main.pdf	PATTERNS OF ACCRETION OF REEFS IN THE SUDANESE RED SEA	NA	Reefs in the North Towartit and Shambaya Groups of the Sudanese Red Sea rest on major blocks which have been defined by large-scale fault movements. The dominant surface features in these areas have been formed by the sub-aerial sculpting of Tertiary and later limestones during late Pleistocene periods of low sea-level stand. This has resulted in the formation of large numbers of closed depressio…	1	0	0	1	Eastern Africa	NA	1-s2.0-0025322782901165-main.pdf	1	Europe	UK
1219	SUVAPEPUN	1991	17	1-s2.0-0025326X9190677K-main.pdf	Long Term Ecological Changes in the Gulf of Thailand	NA	The Gulf of Thailand is a tropical enclosed sea in the southwestern part of the South China Sea. The increasing deteriorating conditions in the coastal environment have raised concern among scientists and public. The frequency of occurrence of plankton bloom has markedly increased in some estuarine and mangrove areas corresponds to the increase in nutrients loading. Patterns of changes in biomass…	1	0	0	1	Southeast Asia	NA	1-s2.0-0025326X9190677K-main.pdf	1	Southeast Asia	Thailand
617	Hutchings	1994	18	1-s2.0-0025326X94904227-main.pdf	The Current Status of Coral Reef 5 in French Pacific Islands	The current status of coral reef management in French Polynesia	The current status of French Polynesian coral reefs is reviewed with respect to the resources, both renewable and non-renewable, which are extracted from the reef areas. The various factors impacting on the reefs such as sewage, land run-off, overfishing, industrial and agricultural effluent, and tourism are discussed together with any legislation controlling these activities. The three marine re…	0	0	1	1	Pacific Islands	NA	1-s2.0-0025326X94904227-main.pdf	3	Australia and NZ	Australia	French Polynesia	France
612	Huber	1994	19	1-s2.0-0025326X94904286-main.pdf	An Assessment of the Status of the Coral Reefs of Papua New Guinea	An assessment of the status of the coral reefs of Papua New Guinea	Papua New Guinea's coral reefs are of global significance in extent and diversity. They are very poorly studied. The primary human uses are subsistence and artisanal commercial fisheries. While the reef fishery resources are underutilized on a national scale, localized overfishing has occurred where there has been access to cash markets. PNG reefs are thought to be relatively undisturbed, but the…	1	0	0	1	Pacific Islands	NA	1-s2.0-0025326X94904286-main.pdf	1	Australia and NZ	Australia
536	Grindrod	1988	20	1-s2.0-0034666788900887-main.pdf	THE PALYNOLOGY OF HOLOCENE MANGROVE AND SALTMARSH SEDIMENTS, PARTICULARLY IN NORTHERN AUSTRALIA	The palynology of holocene mangrove and saltmarsh sediments, particularly in Northern Australia	Mangrove communities of the tropics are floristically distinctive, display neat segregation of species, and command a precise ecological niche which confines them almost exclusively to intertidal environments. Saltmarshes often form a further discrete vegetation zone near to the upper tidal limit, landward of mangroves. Both these vegetation types contain prolific pollen producers, and are tempti…	1	0	0	1	Australia and NZ	NA	1-s2.0-0034666788900887-main.pdf	1	Australia and NZ	Australia
393	Eong	1993	21	1-s2.0-004565359390070L-main.pdf	MANGROVES - A CARBON SOURCE AND SINK	Mangroves - a carbon source and sink	The mangrove ecosystem in many wet tropical areas represents one of the most, if not the most productive of natural ecosystems. The question that has occupied the minds of many mangrove scientists is "What is the fate of this high productivity"? More recently this question has gained added relevance as a result of the increase in global carbon dioxide concentration. Are mangroves sinks of atmosph…	1	0	0	1	Southeast Asia	NA	1-s2.0-004565359390070L-main.pdf	1	Southeast Asia	Malaysia
1355	yak	1989	22	1-s2.0-0094576589900660-main.pdf	APPLICATION OF SATELLITE DATA FOR I~ORITORING DEGRADATION OF TIDAL WETLANDS OF THE GULF OF rJ~CHCHH, WESTERN INDIA	NA	Tidal wetlands act as feeding, spawning and nursery grounds to marine fisheries. They also help in protecting the coast from the marine erosion. Thus there is a need to monitor the tidal wetlands periodically. Landsat MSS and TM data of period 1975-1986 is analysed for monitoring the tidal wetland areas of the Gulf of Kachchh, Western India. This area was declared as the Marine National Park in 1…	0	1	0	1	Southwest Asia	NA	1-s2.0-0094576589900660-main.pdf	2	Southwest Asia	India	India
572	Hawkins	1982	23	1-s2.0-0272771482900774-main.pdf	Ecological Energetics of the Tropical Sea Urchin Diadema antillarum Philippi in Barbados, West Indies	Ecological energetics of the tropical sea urchin Diadema antillarum Philippi in Barbados, West Indies	The common tropical sea urchin Diadema antillarum Philippi is the dominant herbivore on fringing coral reefs in Barbados, West Indies. The biological importance of Diadema as an agent of energy transfer was evaluated from energy budgets constructed for the population and for individuals of IO size groups. Monthly energy budgets for urchins of various size groups balance within I kcal except for u…	0	1	0	1	Non-specific	NA	1-s2.0-0272771482900774-main.pdf	2	North America	Canada	Canada
1026	Planes	1994	24	1-s2.0-0964569194900566-main.pdf	Study of the Coral Reefs of Bora-Bora (Society Archipelago, French Pacific Islands) for the Development of a Conservation and 5 Plan	NA	Bora-Bora (French Polynesia) is a high volcanic island surrounded by an extensive coral reef complex. Environmental problems together with several conflicts between lagoon users have led the Polynesian government to develop a conservation and management plan for Bora-Bora's reefs and reef resources. A scientific field study has been carried out, which identifies the healthiest and richest parts, …	0	0	1	1	Pacific Islands	NA	1-s2.0-0964569194900566-main.pdf	9	Europe	France	France	Australia	French Polynesia	New Caledonia	French Polynesia	French Polynesia	France	French Polynesia
991	Pendleton	1995	25	1-s2.0-096456919500007O-main.pdf	Valuing coral reef protection	Valuing coral reef protection	Past economic valuations of tropical marine parks inaccurately measure their economic benefits because they value the resource protected and not the protection provided. Instead, the economic benefit of a marine park should be measured as the savings from avoided losses in reef value that would result in the absence of park protection, net of any costs of protection. Proponents of marine parks po…	1	0	0	1	Caribbean	NA	1-s2.0-096456919500007O-main.pdf	1	North America	USA
1112	Rotjan	2014	26	1-s2.0-B9780128002148000086-main.pdf	Establishment, 5, and Maintence of the Phoenix Islands Protected Area	NA	The Republic of Kiribati's Phoenix Islands Protected Area (PIPA), located in the equatorial central Pacific, is the largest and deepest UNESCOWorld Heritage site on earth. Created in 2008, it was the first Marine Protected Area (MPA) of its kind (at the time of inception, the largest in the world) and includes eight low-lying islands, shallow coral reefs, submerged shallow and deep seamounts and …	0	0	1	1	Pacific Islands	NA	1-s2.0-B9780128002148000086-main.pdf	23	North America	USA	USA	USA	USA	USA	USA	Kenya	Australia	Kiribati	USA	Kiribati	USA	USA	Canada	Samoa	USA	Kiribati	Kiribati	USA	USA	Kiribati	USA	Kiribati
44	AI-Jufaili	1999	27	1-s2.0-S0272771499800109-main.pdf	Human Impacts on Coral Reefs in the Sultate of Oman	NA	A rapid assessment survey of the coral reefs of the Sultanate of Oman was conducted by the Ministry of Regional Municipalities and Environment during the first half of 1996. The survey revealed new information on the distribution pattern of corals in Oman and identified impacts, threats and potential threats to coral communities for the purpose of preparation of a National Coral Reef Management P…	0	0	1	1	Southwest Asia	NA	1-s2.0-S0272771499800109-main.pdf	7	Southwest Asia	Oman	Oman	Oman	UK	UK	UK	Oman
45	AI-Madany	1991	28	1-s2.0-S0301479705800702-main.pdf	Coastal Zone 5 in Bahrain: an Alysis of Social, Economic and Environmental Impacts of Dredging and Reclamation	NA	During the past decades, a number of sites along the coast of Bahrain have been either reclaimed or dredged. A total area of approximately 34 km 2 was gained through these operations. These operations, as carried out in Bahrain, have drastic effects on the coastal marine ecosystems and environments. They have induced siltation, increased turbidity of the sea-water and of the salinity of the islan…	0	1	0	1	Southwest Asia	NA	1-s2.0-S0301479705800702-main.pdf	3	Southwest Asia	Bahrain	Bahrain	Bahrain
274	Coffroth	1989	29	1-s2.0-S0422989408700357-main.pdf	CORAL MPRTALITY OUTSIDE OF THE EASTERN PACIFIC DURING 1 9 8 2 - 1 9 8 3 : Relationship TO EL NINO	NA	1 9 8 2 - 8 3 witnessed the most widespread coral bleaching and mortality in recorded history. reported from the Great Barrier Reef (GBRJ. These reports were followed in early 1 9 8 3 with observations of coral bleaching and mortality in the Java Sea, Tokelau Islands, French Polynesia, Galapagos Islands, and on the Pacific coast of Panama and in m i d - 1 9 8 3 with bleaching in the southwestern …	0	0	1	1	Pacific Islands	NA	1-s2.0-S0422989408700357-main.pdf	3	North America	USA	USA	Australia
770	Luttinger	1997	30	1-s2.0-S0964569197000148-main.pdf	Community-based coral reef conservation in the Bay Islands of Honduras	Community-based coral reef conservation in the Bay Islands of Honduras	The evolution of a community-based marine conservation effort in the Bay Islands serves as a valuable example to all islands that face similarly conflicting economic and environmental pressures. Like many small developing tropical islands, the main island of Roatdm is undergoing rapid development to accommodate a surge in nature tourism. As the traditional fish and shrimping industries have dwind…	1	0	0	1	Central America	NA	1-s2.0-S0964569197000148-main.pdf	1	North America	USA
783	Makoloweka	1997	31	1-s2.0-S0964569197000628-main.pdf	Coastal magement in Tanga, Tanzania: a decentralized community-based approach	Coastal management in Tanga, Tanzania: A decentralized community-based approach	This paper describes a new initiative in coastal management in northeastern Tanzania. The region is within the equatorial part of the Western Indian Ocean. The priority environmental issues being faced include declining fish catches, use of destructive fishing techniques, mangrove cutting and coastal erosion. There is a widespread perception among the users of the coastal resources that managemen…	0	1	0	1	Eastern Africa	NA	1-s2.0-S0964569197000628-main.pdf	2	East Africa	Tanzania	Tanzania
784	Makoloweka	1997	31	1-s2.0-S0964569197000628-main.pdf	Coastal magement in Tanga, Tanzania: a decentralized community-based approach	Silencing the dynamite fishers.	This paper describes a new initiative in coastal management in northeastern Tanzania. The region is within the equatorial part of the Western Indian Ocean. The priority environmental issues being faced include declining fish catches, use of destructive fishing techniques, mangrove cutting and coastal erosion. There is a widespread perception among the users of the coastal resources that managemen…	0	1	0	1	Eastern Africa	NA	1-s2.0-S0964569197000628-main.pdf	2	East Africa	Tanzania	Tanzania
904	MUSTAPHA	2014	32	10 Mustapha.pdf	Coral Reef and Associated Habitat Mapping Using ALOS Satellite Imagery	NA	Coral reefs are rich in biodiversity and ecosystem services. However increase in degradation are still occurring at an alarming rate. In management of this ecosystem, determination of its spatial distribution is of importance. Satellite imageries can be used to map distribution extent using spectral characteristics which is a fundamental parameter in mapping. The aims of this study were to determ…	0	1	0	1	Southeast Asia	NA	10 Mustapha.pdf	2	Southeast Asia	Malaysia	Malaysia
89	Arceo-Carranza	2008	33	11293-16902-1-SM.pdf	1 and temporal characterization of fish assemblages in a tropical coastal system influenced by freshwater inputs: northwestern Yucatan peninsula	NA	Coastal lagoons are important systems for freshwater, estuarine and marine organisms; they are considered important zones of reproduction, nursery and feeding for many fish species. The present study investigates the fish assemblages of the natural reserve of Dzilam and their relationship with the hydrologic variables. A total of 6 474 individuals (81 species) were collected, contributing with mo…	0	1	0	1	Central America	NA	11293-16902-1-SM.pdf	2	Central America	Mexico	Mexico
474	Gayle	2005	34	12-GayleTra.pdf	Transplantation of benthic species to mitigate impacts of coastal development in Jamaica	NA	Maintaining regional competitiveness and economic viability for Port Bustamante - Kingston Harbour, Jamaica, required improved accessibility to Post Panamax (too large to pass through the Panama Canal) container vessels. Removal of the northern portion of the shallow coral reef at Rackhams Cay, which was partially obstructing the western end of the east ship channel, was proposed. This aesthet…	0	1	0	1	Caribbean	NA	12-GayleTra.pdf	3	Caribbean	Jamaica	Jamaica	Jamaica
1311	Wehrtmann	2007	35	14-WEHRTMANN.pdf	Crustacean fau (Stomatopoda: Decapoda) associated with the deepwater fishery of Heterocarpus vicarius (Decapoda: Pandalidae) along the Pacific coast of Costa Rica	Crustacean fauna (Stomatopoda: Decapoda) associated with the deepwater fishery of Heterocarpus vicarius (Decapoda: Pandalidae) along the Pacific coast of Costa Rica	Commercial bottom trawling is a successful and commonly used method to catch marine shrimps. However, the shrimp fishing gears are poorly selective, and in addition to the target species they catch and retain large quantities of non-target species (bycatch). This study presents data concerning species composition and depth distribution of the crustacean fauna (stomatopods and decapods) associated…	0	1	0	1	Central America	NA	14-WEHRTMANN.pdf	3	Central America	Costa Rica	Costa Rica	Costa Rica
910	Myers	2012	36	14486563%2E2011%2E646755.pdf	Climate change and stewardship: strategies to build community resilience in the Capricorn Coast	Climate change and stewardship: Strategies to build community resilience in the Capricorn Coast	The Great Barrier Reef is projected to change substantially over the next 50 years due to the impacts of climate change. These impacts are likely to have severe repercussions for the communities and industries that depend on resources and services provided by the marine ecosystem. Understanding ways to increase community resilience to the impacts of climate change are essential. This study sought…	0	1	0	1	Australia and NZ	NA	14486563%2E2011%2E646755.pdf	4	Australia and NZ	Australia	Australia	Australia	Australia
308	CRUZ	2013	37	15685403_086_02_S03_text.pdf	ESTIMATION OF ABUNDANCE AND SPATIAL DISTRIBUTION OF PANULIRUS ARGUS USING DIFFERENT METHODOLOGIES IN ARTIFICIAL SHELTER, TRAP AND CORAL REEF FISHERIES	NA	Estimates of spiny lobster stocks (Panulirus argus Latreille, 1804) represent a fundamental input for population assessment models and are, therefore, indispensable for proper management. In this study we analysed methodologies employed in the Gulf of Batabanó (Cuba) and Providencia and Santa Catalina (Colombian Caribbean) to estimate abundance (N) and stock productivity. We found evidence that t…	0	0	1	1	Caribbean	NA	15685403_086_02_S03_text.pdf	2	South America	Brazil	Colombia
1062	Rahman	2015	38	19443994%2E2015%2E1006820.pdf	Coastal water quality of Tioman Island: effects of human activity and the distance from shoreline	NA	A study was conducted to know the (i) effect of anthropogenic activity and (ii) effects of distance from shoreline on the coastal water quality of Tioman Island, Malaysia. This study was a part of marine expedition conducted on 4 July 2012 to understand coral diversity and distribution around coastal water of Tioman Island. A series of physicochemical parameters namely temperature, dissolved oxyg…	0	1	0	1	Southeast Asia	NA	19443994%2E2015%2E1006820.pdf	4	Southeast Asia	Malaysia	Malaysia	Malaysia	Malaysia
382	Duval	2004	39	2004 Habitats and MPAs.pdf	LINKING HABITAT PROTECTION AND MARINE PROTECTED AREA PROGRAMS TO CONSERVE CORAL REEFS AND ASSOCIATED BACK REEF HABITATS	Linking habitat protection and marine protected area programs to conserve coral reefs and associated back reef habitats	A variety of mechanisms exist at the state, territorial, and federal level in the U.S. to protect habitats critical in the development of reef fi sh species. The most recently formulated are the Essential Fish Habitat designations in federal waters, in addition to various National Environmental Policy Act-associated and state-level permitting processes, as well as provisions of the Coastal Zone M…	0	1	0	1	Caribbean	NA	2004 Habitats and MPAs.pdf	3	North America	USA	USA	USA
151	Berlinck	2004	40	2004-Berlinck et al - JNP.pdf	Challenges and Rewards of Research in Marine tural Products Chemistry in Brazil#	NA	Brazil is blessed with a great biodiversity, which constitutes one of the most important sources of biologically active compounds, even if it has been largely underexplored. As is the case of the Amazon and Atlantic rainforests, the Brazilian marine fauna remains practically unexplored in the search for new biologically active natural products. Considering that marine organisms have been shown to…	0	1	0	1	South America	NA	2004-Berlinck et al - JNP.pdf	20	South America	Brazil	Brazil	Brazil	Brazil	Brazil	Brazil	Brazil	Brazil	Brazil	Brazil	Brazil	Brazil	Brazil	Brazil	Brazil	Brazil	Brazil	Brazil	Brazil	Brazil
450	Fredston-Hermann	2013	41	2013_Fredston-Hermann et al Pristine caribbean molluscan communities BMS.pdf	MARKED ECOLOGICAL SHIFTS IN SEAGRASS AND REEF MOLLUSCAN COMMUNITIES SINCE THE MIDHOLOCENE IN THE SOUTHWESTERN CARIBBEAN	Marked ecological shifts in seagrass and reef molluscan communities since the mid-holocene in the southwestern caribbean	Caribbean coastal ecosystems have undergone severe degradation both historically and recently, primarily caused by the synergistic effects of overfishing, eutrophication, sedimentation, disease, and other factors associated with humans. Baseline conditions from pristine Caribbean reefs and seagrass beds are required to understand and quantify degradation. Only the fossil record can provide pre-hu…	0	0	1	1	Central America	NA	2013_Fredston-Hermann et al Pristine caribbean molluscan communities BMS.pdf	4	North America	USA	Panama	USA	UK
325	Dangeubun	2013	42	2013.518-529.pdf	Problem of fisher community and its implication on the magement of South-East Aru conservation region	Problem of fisher community and it's implication on the management of South-East Aru conservation region	Ninety percent of Aru Islands community are fishers and mostly inhabit coastal areas and small islands. This area mostly comprises of small islands, having unique characteristics of marine resources and quite a lot of endemic species such as turtles, dugongs, and dolphins. This area also has quite complex and diverse resources ecosystem, resulting a variety of illegal practices in natural resourc…	0	1	0	1	Southeast Asia	NA	2013.518-529.pdf	2	Southeast Asia	Indonesia	Indonesia
654	Jontila	2014	43	2014.194-206.pdf	The Sea cucumbers (Holothuroidea) of Palawan, Philippines	The sea cucumbers (Holothuroidea) of Palawan, Philippines	Sea cucumbers are among the heavily exploited invertebrates in the Philippines that are not regulated due to limited scientific information needed to support the development of management measures. This study was therefore conducted to generate information on sea cucumber species in Palawan, Philippines. Sixteen sites covering different habitats (intertidal flats, seagrass beds, mangrove areas an…	0	1	0	1	Southeast Asia	NA	2014.194-206.pdf	3	Southeast Asia	Philippines	Philippines	Philippines
496	Gonzales	2014	44	2014.372-385.pdf	Marine resource assessment for sustaible utilization of Ske Island, Palawan, Philippines	Marine resource assessment for sustainable utilization of Snake Island, Palawan, Philippines	The marine resources of Snake Island were assessed from July 17 to August 9, 2008 using coastal habitat survey methods. The live benthic cover in the Island averaged 53.38% (good condition) and out of six stations, two stations have excellent reef condition. There were 171 fish species recorded the Island, with an average biomass of 37.17 mt/km2. Snake Island has lower live coral cover and fish b…	0	1	0	1	Southeast Asia	NA	2014.372-385.pdf	4	Southeast Asia	Philippines	Philippines	Philippines	Philippines
1257	Turak	2007	45	3000_Turak_2007.pdf	Reef-building corals and coral communities of the Yemen Red Sea	Reef-building corals and coral communities of the Yemen Red Sea	The types of reef forms and the composition, diversity, zoogeographic affinities and ecological status of coral communities of the Yemen Red Sea were assessed between 1996 and 1998. Contemporary coral growth occurs as true accreting reefs fringing the mainland coast and islands, submerged patch reefs, and in non-accreting coral assemblages typically associated with three forms of substrate: red …	0	0	1	1	Southwest Asia	NA	3000_Turak_2007.pdf	3	Europe	France	Australia	Australia
664	Kamal	2009	46	313-342.pdf	Coastal and estuarine resources of Bangladesh: magement and conservation issues	Coastal and estuarine resources of Bangladesh: Management and conservation issues	The coastal area of Bangladesh includes a number of bays into which different types of rivers empty, creating an estuarine ecosystem adjacent to the shore. The main estuarine systems are Brahmaputra-Megna (Gangetic delta), Karnaphuly, Matamuhuri, Bakkhali and Naf rivers, which are comprised of mangroves, salt marshes, seagrass, seaweeds, fisheries, coastal birds, animals, coral reefs, deltas, sal…	0	1	0	1	Southwest Asia	NA	313-342.pdf	2	Southwest Asia	Bangladesh	Bangladesh
1268	va	2011	47	3414-5315-1-PB.pdf	Government conservation policies on Mexican coastal areas: is Ðtop-downÓ magement working?	NA	Marine and terrestrial ecosystems are declining globally due to environmental degradation and poorly planned resource use. Traditionally, local government agencies have been responsible of the management of natural reserves to preserve biodiversity. Nonetheless, much of these approaches have failed, suggesting the development of more integrative strategies. In order to discuss the importance of a…	0	1	0	1	Central America	NA	3414-5315-1-PB.pdf	2	Central America	Mexico	Mexico
1119	Ruxton	2006	48	4358_Ruxton_2006.pdf	REALTIME ENVIRONMENTAL MONITORING OF THE GREAT BARRIER REEF	NA	The Great Barrier Reef (GBR) is the largest natural feature on earth, stretching more than 2,300km along the northeast coast of Australia. It contains a diverse array of species and habitats that are threatened by environmental and human impacts. Monitoring the environmental changes on the GBR would enable scientists, managers and commercial groups to better understand the health of this ecologic…	0	1	0	1	Australia and NZ	NA	4358_Ruxton_2006.pdf	4	Australia and NZ	Australia	Australia	Australia	Australia
441	Fonseca	2009	49	5216-7556-1-PB.pdf	Marine habitats map of ÐIsla del Ca_oÓ, Costa Rica, comparing Quickbird and Hymap images classification results	NA	Isla del Caño is a marine protected area on the south Pacific coast of Costa Rica, surrounded by coral reefs and coral communities. The ecology of these coral reefs has been studied for over 20 years, but they have not been mapped. Maps are considered a great research, planning, management and monitoring tool. Medium to high resolution images (HyMap 2005 and Quickbird 2007 respectively) were proc…	0	0	1	1	Central America	NA	5216-7556-1-PB.pdf	4	Central America	Costa Rica	Panama	Costa Rica	Costa Rica
239	Chanmethakul	2010	50	546d6e340cf2193b94c585ec.pdf	Soft Coral (Cnidaria: Alcyocea) Distribution Patterns in Thai Waters	Soft coral (Cnidaria: Alcyonacea) distribution patterns in Thai waters	The aim of this study was to conduct a biodiversity survey of soft corals in Thai waters by focusing on genera richness, distribution, and ecological aspects. The locations of the study were in 2 geographic regions: the Andaman Sea coast of Thailand and the Gulf of Thailand. All of the study sites were surveyed in June 2004 - May 2006. Soft corals of 4 families comprising 19 genera were found: Al…	0	1	0	1	Southeast Asia	NA	546d6e340cf2193b94c585ec.pdf	3	Southeast Asia	Thailand	Thailand	Thailand
682	Kirkman	2002	51	54757f220cf29afed6126fd5.pdf	THE MAGEMENT OF SEAGRASSES IN SOUTHEAST ASIA	NA	Seagrass beds have major benefits for communities living on or near the coast. In Southeast Asia they are not well mapped and little is known of them. It is not clear how much seagrass is lost nor how far the degradation will go. Globally, more than 30 yrs ago, scientists reported the need to stop the degradation of seagrasses. The benefits and biology of seagrasses and the causes of degradation …	0	1	0	1	Southeast Asia	NA	54757f220cf29afed6126fd5.pdf	2	Southeast Asia	Thailand	Thailand
1101	Rojo-Vözquez	2007	52	5513-7810-1-PB.pdf	The fish species composition and variation of catch from the small-scale gillnet fishery before, during and after the 1997-1998 ENSO event, central Mexican Pacific	NA	In the tropical and subtropical coastal zone, were highly diverse fish communities occur, it is important to study the small scale fisheries exploiting these communities. For this study, 219 fishing days were carried out in Bahia de Navidad, Jalisco, Mexico. Four gillnets with different mesh sizes (76.2, 88.9, 101.6 and 114.3 mm) were used for the fishing operations, from April 1994 to March 1995…	0	1	0	1	Central America	NA	5513-7810-1-PB.pdf	8	Central America	Mexico	Mexico	Mexico	Mexico	Mexico	Mexico	Mexico	Mexico
1295	Vo	2014	53	62rbz513-520.pdf	Ninh Hai waters (south Vietm): a hotspot of reef corals in the western South Chi Sea	Ninh Hai waters (south Vietnam): A hotspot of reef corals in the western South China Sea	Reef geomorphology, species composition and community structure of reef-building corals of Ninh Hai (south central Vietnam) were investigated from 20032011, contributing towards development of an integrated, representative national and regional network of Marine Protected Areas. Ninh Hai hosts extensive and diverse fringing coral reefs covering more than 2,300ha, the result of favourable physico…	0	0	1	1	Southeast Asia	NA	62rbz513-520.pdf	4	Southeast Asia	Vietnam	Australia	Vietnam	Vietnam
345	Deepanda	2012	54	767-2717-1-PB.pdf	Human Disturbance on Tropical Rockyshore Assemblages and the Role of Marine Protected Areas in Reducing its Impact	NA	Marine protected areas (MPAs) are areas in the coastal zone of land or seas especially dedicated to protection and maintenance of biological diversity, and are currently receiving increasing attention as management tools for protecting marine populations from destructive human activities. The present study explores the impact of a marine protected area (MPA) in Sri Lanka on a gradient of anthropo…	0	1	0	1	Southwest Asia	NA	767-2717-1-PB.pdf	2	Europe	Germany	Germany
847	MCMANUS	2010	55	97522-787.pdf	Toward Establishing a Spratly Islands Intertiol Marine Peace Park: Ecological Importance and Supportive Collaborative Activities with an Emphasis on the Role of Taiwan	NA	The Spratly Islands constitute one of the earths most ecologically significant areas, hosting a high diversity of marine species, providing critical habitats for endangered species, and providing marine larvae to reestablish depleted stocks among the heavily overfished and degraded coastal ecosystems of the South China Sea. Territorial disputes have led to the establishment of environmentally de…	0	0	1	1	Southeast Asia	NA	97522-787.pdf	3	North America	USA	China	China
401	Esteves	2008	56	a06v684s.pdf	Neotropical coastal lagoons: An appraisal of their biodiversity, functioning, threats and conservation magement	Neotropical coastal lagoons: An appraisal of their biodiversity, functioning, threats and conservation management	Neotropical coastal lagoons (NCL) are human-dominated ecosystems. Their distribution along densely populated coastal areas of developing countries makes these systems among the most threatened in the world. Here, we summa­rize some aspects of the causes and consequences of NCL biodiversity, their functioning, their importance to the sur­rounding populations, their fragility, and their responses t…	0	1	0	1	South America	NA	a06v684s.pdf	6	South America	Brazil	Brazil	Brazil	Brazil	Brazil	Brazil
32	ABUODHA	2002	57	Abuodha_2002.pdf	Environmental Impact Assessment of the Proposed Titanium Mining Project in Kwale District, Kenya	NA	This article addresses both environmental and socioeconomic issues concerned with the development or operation of the envisaged titanium mining project in Kwale District of Kenya. TIOMIN Resources Inc., of Canada, through its wholly owned Kenyan subsidiary, Kenya Titanium Minerals Ltd., is proposing to develop a titanium sands mine and mineral processing plants which will produce high grades of h…	1	0	0	1	Eastern Africa	NA	Abuodha_2002.pdf	1	East Africa	Kenya
35	Adjeroud	2013	58	Adjeroud-2013-Coral assemblages in Tonga_ Spat.pdf	Coral assemblages in Tonga: spatial patterns, replenishment capacities, and implications for conservation strategies	Coral assemblages in Tonga: Spatial patterns, replenishment capacities, and implications for conservation strategies	Coral reefs in Tonga have been confronted by multiple threats of various origins, including largescale disturbances and human-induced stressors. These reef communities have been poorly studied, and efficient conservation actions are urgently needed. The aim of this study was to: (1) examine the spatial distribution of coral assemblages in the lagoon of Tongatapu; (2) determine the degree to which…	0	0	1	1	Pacific Islands	NA	Adjeroud-2013-Coral assemblages in Tonga_ Spat.pdf	4	Pacific Islands	New Caledonia	France	French Polynesia	New Caledonia
20		2014	59	Agoramoorthy-2014-Indiaâs coastal zone magem.pdf		NA	Indias Gujarat state has a long coastline with rich maritime history. The entrepreneurial nature of its citizens enabled Gujarat to emerge as the most aggressive industrial development state in the country. Due to the availability of vast land resource for industrial expansion along the coast, affordable labor cost, sparse human density and liberal state government policies have significantly co…	0	0	1	1	Non-specific	NA	Agoramoorthy-2014-Indias coastal zone managem.pdf	5	East Asia	Taiwan	India	Canada	India	Taiwan
39	Aguilar-Perera	2006	60	Aguilar-Perera-2006-Disappearance of a ssau.pdf	Disappearance of a ssau grouper spawning aggregation off the southern Mexican Caribbean coast	Disappearance of a Nassau grouper spawning aggregation off the southern Mexican Caribbean coast	A Nassau grouper spawning aggregation formed in large numbers (e.g. 1000 to 15000 ind.) for more than 50 yr at the traditional aggregation site off Mahahual, Quintana Roo, Mexico (eastern Yucatan Peninsula). However, in the early 1990s the aggregation ceased forming at the site, and only small aggregations were found south of the site (1 to 2 km) moving northward along the fore reef. The spawning…	1	0	0	1	Central America	NA	Aguilar-Perera-2006-Disappearance of a Nassau.pdf	1	Central America	Mexico
40	Aguilar-Perera	2007	61	Aguilar-Perera-2007-Variation in juvenile fish.pdf	Variation in juvenile fish density along the mangrove_seagrass_coral reef continuum in SW Puerto Rico	Variation in juvenile fish density along the mangrove-seagrass-coral reef continuum in SW Puerto Rico	While the composition of the fish community of SW Puerto Rico has been studied extensively, little information is available on the importance of different shallow-water areas (i.e. back reef systems) as juvenile habitat. We investigated the extent to which 20 selected, reef-associated fish species use mangrove and seagrass as juvenile habitat in contrast to shallow-water coral reefs. A stratified…	0	0	1	1	Caribbean	NA	Aguilar-Perera-2007-Variation in juvenile fish.pdf	2	Caribbean	Puerto Rico	Mexico
42	Ahmed	2006	62	Ahmed-2007-Valuing recreatiol and conservati.pdf	Valuing recreatiol and conservation benefits of coral reefsThe case of Bolio, Philippines	NA	The recognition of recreational and conservation benefits of coral reefs globally provides a sound economic rationale for their management. The value of recreational and conservation benefits of coral reefs along the Lingayen Gulf, Bolinao, Philippines is evaluated using travel cost and contingent valuation methods, respectively. Empirical results generated consumer surplus valued at PhP10,463 (U…	0	0	1	1	Southeast Asia	NA	Ahmed-2007-Valuing recreational and conservati.pdf	5	Southeast Asia	Malaysia	Malaysia	Malaysia	Malaysia	Philippines
1179	Silva	2011	63	AI_2011_6_S1_Silva_etal.pdf	Expansion of the invasive corals Tubastraea coccinea and Tubastraea tagusensis into the Tamoios Ecological Station Marine Protected Area, Brazil	Expansion of the invasive corals tubastraea coccinea and tubastraea tagusensis into the tamoios ecological station marine protected area, Brazil	The scleractinian corals Tubastraea coccinea Lesson, 1829 and Tubastraea tagusensis Wells, 1882 are the first alien corals to be introduced into the South Atlantic and threaten native marine organisms due to their noxious attributes. This study aimed to determine the spatial distribution and relative abundance of these species throughout the Tamoios Ecological Station Marine Protected Area (MPA).…	0	1	0	1	South America	NA	AI_2011_6_S1_Silva_etal.pdf	5	South America	Brazil	Brazil	Brazil	Brazil	Brazil
48	Albert	2013	64	Albert-2013-Contrasts in social and ecologica1.pdf	Contrasts in Social and Ecological Assessments of Coral Reef Health in Pacific Islands	Contrasts in social and ecological assessments of coral reef health in melanesia	Numerous studies have explored the shifting baseline syndrome (SBS), which suggests that individual perceptions of environmental health are formed by comparing the environment to a baseline from the past. Understanding social perceptions of environmental conditions, especially where they differ from ecological assessments, can help guide environmental management efforts. In this study we comp…	0	1	0	1	Pacific Islands	NA	Albert-2013-Contrasts in social and ecologica1.pdf	3	Australia and NZ	Australia	Australia	Australia
53	Alcala	2006	65	Alcala-2006-No-take marine reserves and reef 1.pdf	No-take Marine Reserves and Reef Fisheries 5 in the Philippines: A New People Power Revolution	No-take marine reserves and reef fisheries management in the Philippines: A new people power revolution	The marine-conservation and reef fisheriesmanagement program that exists today in the Philippines had humble beginnings in the 1970s at Sumilon and Apo islands. These islands have produced some of the best evidence available that no-take reserves, protected and managed by local communities, can play a key role in biodiversity conservation and fisheries management. Perhaps more importantly, they …	0	0	1	1	Southeast Asia	NA	Alcala-2006-No-take marine reserves and reef 1.pdf	2	Southeast Asia	Philippines	Australia
8		2010	66	Aldarondo-Torre-2010-Trace metals, PAHs, and P.pdf		NA	This study provides baseline information on the extent of contamination in sediments of the Jobos Bay estuary and surrounding areas in Puerto Rico. Sediments from Jobos Bay area (n = 14) had higher overall average concentrations than those from La Parguera area (n = 5, used as reference site), in lg/g dw, for As (17 vs 9), Cu (29 vs 14), Pb (11 vs 4), and Zn (64 vs 28); and in %, for Fe (2.6 vs 0…	0	0	1	1	Non-specific	NA	Aldarondo-Torre-2010-Trace metals	5	Caribbean	Puerto Rico	USA	Puerto Rico	USA	Puerto Rico
55	Alder	2010	67	Alder-2000-Integrated marine planning for Coco.pdf	Integrated Marine Planning for Cocos (Keeling), An Isolated Australian Atoll (Indian Ocean)	NA	The Cocos (Keeling) Islands are located on an isolated atoll in the Indian Ocean and have a strong Malay culture owing to the translocation of a substantial plantation workforce in the early 19th century. The atoll became one of Australias External Territories in 1955. Meeting the marine resource needs of the atoll residents within an Australian legislative system by formulating an integrated ma…	0	1	0	1	Australia and NZ	NA	Alder-2000-Integrated marine planning for Coco.pdf	3	Australia and NZ	Australia	Australia	Australia
61	Aline	2008	68	Aline-2008-Dissolution of dead corals by euend.pdf	Dissolution of Dead Corals by Euendolithic Microorganisms Across the Northern Great Barrier Reef (Australia)	Dissolution of dead corals by euendolithic microorganisms across the northern Great Barrier Reef (Australia)	Spatial and temporal variabilities in species composition, abundance, distribution, and bioeroding activity of euendolithic microorganisms were investigated in experimental blocks of the massive coral Porites along an inshoreoffshore transect across the northern Great Barrier Reef (Australia) over a 3-year period. Inshore reefs showed turbid and eutrophic waters, whereas the offshore reefs were …	1	0	0	1	Australia and NZ	NA	Aline-2008-Dissolution of dead corals by euend.pdf	1	Europe	France
4		2007	69	Alquezar-2007-Development of rapid, cost effec.pdf		NA	Coral reefs are highly dynamic and productive marine ecosystems, providing habitat and refuge for an enormous number of species including fish, invertebrates and algae. With increased anthropogenic pressures and global climate change, many coral reefs are rapidly declining. Currently, there is limited knowledge on condition and community assemblage composition of shallow fringing coral reefs alon…	0	1	0	1	Non-specific	NA	Alquezar-2007-Development of rapid	2	Australia and NZ	Australia	Australia
69	Alvarado	2012	70	Alvarado_etal_2012.pdf	Distribution and diversity of echinoderms (Asteroidea, Echinoidea, Holothuroidea) in the islands of the Gulf of Chiriqui, Pama	Reconstruction of Diadema mexicanum bioerosion impact on three Costa Rican Pacific coral reefs	The 1982-83 El Niño event produced a high coral mortality (50-90%) in several localities in the Eastern Tropical Pacific, which resulted in an outbreak of the sea urchin populations of Diadema mexicanum A. Agassiz, 1863 in some reefs, leading to an increase in coral framework bioerosion. In Costa Rica, El Niño impact varied among three of the most important coral reefs localities, being higher in…	0	0	1	1	Central America	NA	Alvarado_etal_2012.pdf	3	Central America	Costa Rica	Costa Rica	Mexico
70	Alvarado	2012	70	Alvarado_etal_2012.pdf	Distribution and diversity of echinoderms (Asteroidea, Echinoidea, Holothuroidea) in the islands of the Gulf of Chiriqui, Pama	Distribution and diversity of echinoderms (Asteroidea, Echinoidea, Holothuroidea) in the islands of the gulf of chiriqui, panama [Distribución y diversidad de equinodermos (Asteroidea, Echinoidea, Holothuroidea) en las islas del golfo de chiriquí, panamá]	The 1982-83 El Niño event produced a high coral mortality (50-90%) in several localities in the Eastern Tropical Pacific, which resulted in an outbreak of the sea urchin populations of Diadema mexicanum A. Agassiz, 1863 in some reefs, leading to an increase in coral framework bioerosion. In Costa Rica, El Niño impact varied among three of the most important coral reefs localities, being higher in…	0	0	1	1	Central America	NA	Alvarado_etal_2012.pdf	3	Central America	Costa Rica	Costa Rica	Mexico
71	Alvarez-Lajonchre	2013	71	Alvarez-Lajonch-2013-Aquaculture species selec.pdf	Aquaculture species selection method applied to marine fish in the Caribbean	NA	A five-phase method for the evaluation and selection of tropical marine fish for intensive culture is proposed and the application of the first four phases is presented for the Caribbean region. In phase-1, an initial list of 50 species was prepared from 2175 present in the Western Central Atlantic, based on their commercial importance, and certain relevant biological features. Phase 2 includes e…	0	0	1	1	Non-specific	NA	Alvarez-Lajonch-2013-Aquaculture species selec.pdf	2	Caribbean	Cuba	Mexico
17		2013	72	Alves-2013-Aerial survey of matees, dolphins.pdf		NA	The objective of the present study was to analyze the distribution of manatees, dolphins and sea turtles off northeastern Brazil through aerial surveys, relating them to specific habitats and human activities, with emphasis on marine protected areas (MPAs). Surveys were conducted between January and April 2010 at 150 m altitude and 140 km h 1, using two independent observers. Strip transects were…	0	1	0	1	Non-specific	NA	Alves-2013-Aerial survey of manatees	7	South America	Brazil	Brazil	Brazil	Brazil	Brazil	Brazil	Brazil
72	Amand	2004	73	Amand-2004-A step toward the definition of eco.pdf	A step toward the definition of ecological indicators of the impact of fishing on the fish assemblage of the Abore reef reserve (New Caledonia)	NA	Marine Protected Areas (MPA) are often contemplated as a tool for the sustainable management of exploited resources and ecosystem conservation. This paper proposes an approach to establish a statistical diagnostic of the effects ofMPAs on fish assemblages, and define corresponding ecological indicators. This requires choosing relevant variables (abundance, diversity, demographic parameters. . . )…	0	0	1	1	Pacific Islands	NA	Amand-2004-A step toward the definition of eco.pdf	4	Pacific Islands	New Caledonia	France	France	New Caledonia
73	Amaral	2005	74	Amaral-2005-Conservation of marine and coastal.pdf	Conservation of Marine and Coastal Biodiversity in Brazil	Conservation of marine and coastal biodiversity in Brazil	The invertebrate benthos, especially the micro- and mesofaunal components, of the Brazilian seas is still poorly known. Relatively few species have been recorded, reflecting the lack of research in this field. The intertidal zone, to depths of about 20 m, has been studied the most, and there the numbers of endemic species are relatively high. The diversity of demersal and pelagic fishes is simila…	0	1	0	1	South America	NA	Amaral-2005-Conservation of marine and coastal.pdf	2	South America	Brazil	Brazil
75	Ammar	2005	75	Ammar-2005-An alarming threat to the red organ.pdf	An alarming threat to the red organ pipe coral Tubipora musica and suggested solutions	An alarming threat to the red organ pipe coral Tubipora musica and suggested solutions	Eighteen sites along the southern Egyptian Red Sea coastline were surveyed for the organ pipe coral Tubipora musica with reference to relative abundance of juveniles, adults, flourishing live, traces of recently collected, traces of older collected and dead colonies. The study was done using a 30-m long graded tape, throughout the period April 2004 to October 2004. T. musica is categorized as vul…	1	0	0	1	Eastern Africa	NA	Ammar-2005-An alarming threat to the red organ.pdf	1	East Africa	Egypt
76	Anderson	2011	76	Anderson-2011-SCUBA diver specialization and b.pdf	Benthic and fish population monitoring associated with a marine protected area in the nearshore waters of Greda, Eastern Caribbean	SCUBA diver specialization and behavior norms at coral reefs	SCUBA diving is an increasingly popular activity that provides a number of benefits to coastal communities. However, the sustainability of recreational diving on coral reefs is largely dependent on the health of reef ecosystems. Divers can minimize their impacts to coral reefs through responsible diving behaviors, which are in part guided by social norms. The behavioral obligation and sanction co…	0	1	0	1	Caribbean	NA	Anderson-2011-SCUBA diver specialization and b.pdf	2	North America	USA	USA
83	Anto	2007	77	Anto_2007_IJSD.pdf	Scientists dealing with stakeholders' demand for coral reef magement indicators: methodological approach and issues	NA	The purpose of this paper is to analyse how to relate scientific supply to demand regarding sustainable management indicators. This discussion is based on coastal zone management in ReÂunion Island, for which socioeconomic indicators have been developed. This research allows us to establish conditions to connect social demand with the scientific supply of indicators: * to develop an iterative pro…	0	1	0	1	Eastern Africa	NA	Antona_2007_IJSD.pdf	2	Europe	France	France
84	Appledoorn	2008	78	Appeldoorn-2008-Transforming reef fisheries ma.pdf	Transforming reef fisheries magement: application of an ecosystem-based approach in the USA Caribbean	NA	Fisheries in Puerto Rico and the United States (US) Virgin Islands are predominately dependent on nearshore coral reef ecosystems and have suffered from historical overfishing. The unique characteristics of reef fisheries, including strong habitat dependence, susceptibility to coastal impacts, diffuse landing sites and strong multispecies and multigear interactions suggest that standard approache…	1	0	0	1	Hawaii	NA	Appeldoorn-2008-Transforming reef fisheries ma.pdf	1	Caribbean	Puerto Rico
92	Aronson	2012	79	Aronson-2012-Catastrophe and the life span of.pdf	Catastrophe and the life span of coral reefs	Catastrophe and the life span of coral reefs	A strong earthquake in the western Caribbean in 2009 had a catastrophic impact on uncemented, unconsolidated coral reefs in the central sector of the shelf lagoon of the Belizean barrier reef. In a set of 21 reef sites that had been observed prior to the earthquake, the benthic assemblages of 10 were eradicated, and one was partially damaged, by avalanching of their slopes. Ecological dynamics th…	0	1	0	1	Central America	NA	Aronson-2012-Catastrophe and the life span of.pdf	4	North America	USA	USA	USA	USA
109	Bacon	1992	80	art%3A10.1007%2FBF00008224.pdf	The magement of Insular Caribbean mangroves in relation to site location and community type	The management of Insular Caribbean mangroves in relation to site location and community type	Mangrove ecosystems occupy different locations on Caribbean island coasts, ranging from open bays (fringe mangals) to totally enclosed salt ponds and salinas. On geomorphologically active coastlines, such as south Jamaica, systems are at varying degrees of maturity and productivity. Furthermore, because of system variability, the interactions between mangroves and associated marine systems, such …	0	1	0	1	Caribbean	NA	art%3A10.1007%2FBF00008224.pdf	2	Caribbean	Jamaica	Jamaica
516	Graus	1998	81	art%3A10.1007%2FBF03175433.pdf	GLOBAL WARMINGANDTHE FUTURE OF CARIBBEAN CORAL REEFS	Global warming and the future of Caribbean coral reefs	Computersimulationswith theCOREEFmodel (Grauset al. 1984)demonstratethat the growth of Caribbeancoral reefs will be unable to match all but the most optimisticpredicted rates of sea level rise that global warming is expected to cause over the next few centuries. and,therefore. these reefs will graduallybecome more submerged. As they deepen, higher waves will propagate into back-reef areas. alteri…	0	1	0	1	Caribbean	NA	art%3A10.1007%2FBF03175433.pdf	2	North America	USA	USA
655	Jordaâ n-Dahlgren	2002	82	art%3A10.1007%2Fs00338-002-0226-9.pdf	Gorgonian distribution patterns in coral reef environments of the Gulf of Mexico: evidence of sporadic ecological connectivity?	NA	Gorgonian species richness and abundance were documented in a survey of 14 reefs across the Gulf of MeÅLxico. The results show two mainpa tterns: (1) a westward decreasing gradient in gorgonian diversity and abundance at both supraspecific and specific levels, from the YucataÅL nstraits to the southwesternGu lf of MeÅLxico reefs; and (2) a northward decreasing gradient in gorgonian diversity and …	1	0	0	1	Central America	NA	art%3A10.1007%2Fs00338-002-0226-9.pdf	1	Central America	Mexico
822	McClahan	2001	83	art%3A10.1007%2Fs003380000133.pdf	Coral an algal changes after the 1998 coral bleaching: interaction with reef magement and herbivores on Kenyan reefs	NA	Interaction between the El Niño and Indian Ocean dipole oceanatmosphere quasi-periodic oscillations produced one of the warmest seawater temperatures on record in 1998. During the warm northeast monsoon in March and April, Kenya's shallow coral reefs experienced water temperatures between 30 and 31 °C and low winds. This caused large-scale bleaching of hard and soft corals at the end of March, w…	0	1	0	1	Eastern Africa	NA	art%3A10.1007%2Fs003380000133.pdf	3	East Africa	Kenya	Kenya	Kenya
1076	Reinicke	2003	84	art%3A10.1007%2Fs10347-003-0035-9.pdf	Patterns and Changes of Reef-Coral Communities at the Sanganeb-Atoll (Sudan, Central Red Sea): 1980 to 1991	Patterns and changes of reef-coral communities at the Sanganeb-Atoll (Sudan, Central Red Sea): 1980 to 1991	Benthic coral reef communities were investigated on the Sanganeb-Atoll, 28 km off thc coast of Porl Sudan (Sudan, central Red Sea). Four test areas (5 x 5 m) were selected and marked in approx. 10 m depth along :, transect running in SSW-NNE direction over the atoll and vvcre mapped in 1980 and I991. Detailed pholographs were used for in situ verification of taxonomic composititm of communities (…	0	1	0	1	Eastern Africa	NA	art%3A10.1007%2Fs10347-003-0035-9.pdf	3	Europe	Germany	Germany	Germany
1163	Segi	2014	85	art%3A10.1007%2Fs10745-014-9669-1.pdf	Protecting or Pilfering? Neoliberal Conservationist Marine Protected Areas in the Experience of Coastal Grada, the Philippines	Protecting or Pilfering? Neoliberal Conservationist Marine Protected Areas in the Experience of Coastal Granada, the Philippines	In recent years conservationist NGOs, policy makers, and scientists in the tropics have expressed a fascination with marine protected areas for simultaneously achieving conservation goals and economic development. Despite their popularity, MPAs often encounter serious implementation challenges due to, at least to some extent, our limited understanding of MPA processes as influenced by neoliberal …	1	0	0	1	Southeast Asia	NA	art%3A10.1007%2Fs10745-014-9669-1.pdf	1	North America	Canada
307	Crosby	2000	86	art%3A10.1023%2FA%3A1005281403279.pdf	INTERACTIONS AMONG SCIENTISTS, MAGERS AND THE PUBLIC IN DEFINING RESEARCH PRIORITIES AND MAGEMENT STRATEGIES FOR MARINE AND COASTAL RESOURCES: IS THE RED SEA MARINE PEACE PARK A NEW PARADIGM?	Interactions among scientists, managers and the public in defining research priorities and management strategies for marine and coastal resources: Is the Red Sea Marine Peace Park a new paradigm?	It has been assumed that marine habitats and resources, especially, are almost unlimited, and that if one habitat became degraded or a particular fisheries resource depleted, there always would be another to replace it. Therefore, natural resource management principals are beginning to include human motivation and responses as part of the marine and coastal systems that are being studied and mana…	0	0	1	1	Eastern Africa	NA	art%3A10.1023%2FA%3A1005281403279.pdf	5	North America	USA	Jordan	Jordan	Israel	Israel
680	Khristoforova	2007	87	art%3A10.1134%2FS0001437007050116.pdf	Heavy Metals in Mass Species of Bivalves in Ha Long Bay (South Chi Sea, Vietm)	Heavy metals in mass species of bivalves in Ha Long Bay (South China Sea, Vietnam)	To characterize the terrigenous, anthropogenic, and technogenous impacts upon the ecosystems of coral reefs in the shallow-water Ha Long Bay, which was declared by UNESCO to be a world natural heritage site, the levels of Fe, Mn, Zn, Cd, Pb, and Ni in the soft tissues of six mass species of bivalve mollusks from island coastal waters were studied. Taking into account the abundance and distributio…	0	0	1	1	Southeast Asia	NA	art%3A10.1134%2FS0001437007050116.pdf	6	Europe	Russia	Russia	Russia	Vietnam	Russia	Vietnam
725	Latypov	2012	88	art%3A10.1134%2FS106307401202006X.pdf	The Composition and Structure of a Protected Coral Reef in Cam Ranh Bay in the South Chi Sea	The composition and structure of a protected coral reef in Cam Ranh Bay in the South China Sea	A nonstructural reef at Hon Nai Island in Cam Ranh Bay (southern Vietnam) was investigated. In comparison with most of the coastal continental and island coral reefs of this region, it is characterized by high species richness of reef building corals, among them scleractinians. A total of 34 species of Acropora were found, which represent 80% of the total species composition of this scleractinian…	0	1	0	1	Southeast Asia	NA	art%3A10.1134%2FS106307401202006X.pdf	2	Europe	Russia	Russia
67	Alvarado	2012	89	art02.pdf	Reconstruction of Diadema mexicanum bioerosion impact on three Costa Rican Pacific coral reefs	Reconstruction of Diadema mexicanum bioerosion impact on three Costa Rican Pacific coral reefs	Studies on echinoderms along the Panamanian Pacific coast have focused mainly on evolutionary and molecular analyses, however little ecological research has been done and mainly only on 2 species: Diadema mexicanum and Acanthaster planci. Herein, we describe for the first time the diversity (based on Margalef, Shannon and Pielou indices), distribution and density of echinoderms for some islands o…	0	0	1	1	Central America	NA	art02.pdf	3	Central America	Costa Rica	Panama	Costa Rica
68	Alvarado	2012	89	art02.pdf	Reconstruction of Diadema mexicanum bioerosion impact on three Costa Rican Pacific coral reefs	Distribution and diversity of echinoderms (Asteroidea, Echinoidea, Holothuroidea) in the islands of the gulf of chiriqui, panama [Distribución y diversidad de equinodermos (Asteroidea, Echinoidea, Holothuroidea) en las islas del golfo de chiriquí, panamá]	Studies on echinoderms along the Panamanian Pacific coast have focused mainly on evolutionary and molecular analyses, however little ecological research has been done and mainly only on 2 species: Diadema mexicanum and Acanthaster planci. Herein, we describe for the first time the diversity (based on Margalef, Shannon and Pielou indices), distribution and density of echinoderms for some islands o…	0	0	1	1	Central America	NA	art02.pdf	3	Central America	Costa Rica	Panama	Costa Rica
466	Garcia-Hernandez	2014	90	art06.pdf	Comparison of ecological diversity and species composition of macroalgae Benthic macroinvertebrates And fish assemblages between two tropical rocky reefs	NA	Within the marine environment, the rocky shores are recognized for their high species diversity and particularly transitional zones represent areas of biotic mix, promoted by historical and ecological natural variations that allow the presence of taxa from different regions and which present dissimilar biological traits. An extensive survey describes the benthic macroalgae, macroinvertebrates (mo…	0	1	0	1	Non-specific	NA	art06.pdf	6	Central America	Mexico	Mexico	Mexico	Mexico	Mexico	Mexico
93	Ashe	2015	91	Ashe-2015-Local population structure and conte.pdf	Local population structure and context-dependent isolation by distance in a large coastal shark	Local population structure and context-dependent isolation by distance in a large coastal shark	Genetic diversity, population genetic structure and isolation by distance (IBD) were assessed in a viviparous coastal shark (the lemon shark Negaprion brevirostris) across 8 western Atlantic samples spaced between ~150 and 7000 km apart. Juveniles (N = 325) were sequenced at 2 mitochondrial loci (1729 bp) and typed at 9 nuclear encoded microsatellite loci. Analysis of mitochondrial sequences reve…	0	1	0	1	Caribbean	NA	Ashe-2015-Local population structure and conte.pdf	9	North America	USA	USA	USA	USA	USA	USA	USA	USA	USA
96	Asoh	2004	92	Asoh-2004-Damage to cauliflower coral by monof.pdf	Damage to Cauliflower Coral by Monofilament Fishing Lines in Hawaii	Damage to cauliflower coral by monofilament fishing lines in Hawaii	Many fishing methods and gear types used in coral reefs cause physical damage to the reef substratum. Only recently have monofilament fishing lines been recognized as a cause of coral damage and death. We assessed the extent of damage caused by monofilament fishing lines to the cauliflower coral ( Pocillopora meandrina) colonies in fished and adjacent unfished zones at seven sites in the main Haw…	0	1	0	1	Hawaii	NA	Asoh-2004-Damage to cauliflower coral by monof.pdf	4	North America	USA	USA	USA	USA
97	Aswani	2007	93	Aswani-2007-Customary magement as precaution.pdf	Customary magement as precautiory and adaptive principles for protecting coral reefs in Oceania	Customary management as precautionary and adaptive principles for protecting coral reefs in Oceania	Marine conservation programs in Oceania are increasingly turning to precautionary and adaptive management, particularly approaches which emphasize local participation and customary management. Although the application of community-based natural resource management is widespread in the region, the full integration of local knowledge and practices into the design, implementation, and monitoring of …	0	0	1	1	Pacific Islands	NA	Aswani-2007-Customary management as precaution.pdf	4	North America	USA	Australia	Australia	Japan
98	Aswani	2012	94	Aswani-2012-The way forward with ecosystem-bas.pdf	The wayforwardwithecosystem-basedmagementintropicalcontexts: Reconcilingwithexistingmagementsystems	The way forward with ecosystem-based management in tropical contexts: Reconciling with existing management systems	This paper discusses some of the challenges and opportunities that can arise when implementing ecosystem-based management (EBM) in tropical nations. EBM creates a new series of challenges, problems, and opportunities that must be considered in light of existing governance and management frameworks in a local context. The paper presents five case studies from different parts of the tropical world,…	0	0	1	1	Southeast Asia	NA	Aswani-2012-The way forward with ecosystem-bas.pdf	11	North America	USA	USA	USA	Barbados	Philippines	USA	USA	USA	USA	Australia	USA
99	Aswani	2014	95	Aswani2014.pdf	INVESTIGATING CORAL REEF ETHNOBIOLOGY IN THE WESTERN SOLOMON ISLANDS FOR ENHANCING LIVELIHOOD RESILIENCE	Investigating coral reef ethnobiology in the western solomon islands for enhancing livelihood resilience	NA	1	0	0	1	Pacific Islands	NA	Aswani2014.pdf	1	North America	USA
549	HAGAN	2007	96	atollresearchbulletin.pdf	TSUMI IMPACTS IN ACEH PROVINCE AND NORTH SUMATRA, INDONESIA	NA	The huge earthquake and resulting tsunami which occurred on December 26, 2004 off the west coast of Sumatra resulted in regionally variable patterns of impact in and around the Indian Ocean basin. The coast of Sumatra was close to the earthquake epicenter and was the first to be struck, within one hour of the event. A collaborative expedition between the Khaled bin Sultan Living Oceans Foundation…	0	0	1	1	Southeast Asia	NA	atollresearchbulletin.pdf	9	North America	USA	USA	Sri Lanka	Indonesia	Indonesia	Indonesia	Indonesia	Indonesia	USA
110	Bahugu	2008	97	Bahugu-2008-Impact of the tsumi and earthq.pdf	Impact of the tsumi and earthquake of 26th December 2004 on the vital coastal ecosystems of the Andaman and Nicobar Islands assessed using RESOURCESAT AWiFS data	NA	Tsunami waves struck the Indian coast on 26th December 2004 affecting the Andaman and Nicobar group of islands. A quick assessment of the status of the vital coastal ecosystems has been made using pre- and post-tsunami Advance Wide Field Sensor (AWiFS) data of Indian satellite RESOURCESAT with an accuracy of 8790% and the Kappa ranging from 0.8696 to 0.9053. Among the coastal ecosystems the cora…	0	0	1	1	Southwest Asia	NA	Bahuguna-2008-Impact of the tsunami and earthq.pdf	3	Southwest Asia	India	India	India
111	Bailey	2012	98	Bailey-2012-Towards better magement of Coral.pdf	Towards better magement of Coral Triangle tu	Towards better management of Coral Triangle tuna	Indonesia, the Philippines, and Papua New Guinea, all part of a regional sub-group known as the Coral Triangle, have sizeable skipjack, yellowfin and bigeye tuna fisheries. Recent figures suggest that as much as a third of tuna catch from the western and central Pacific Ocean can be attributed to the fleets of these countries. Historically, however, little attention has been paid to their fisheri…	0	0	1	1	Southeast Asia	NA	Bailey-2012-Towards better management of Coral.pdf	4	North America	Canada	Philippines	Papua New Guinea	Canada
113	Baird	2011	99	Baird-2011-Seasolity of coral reproduction i.pdf	Seasolity of coral reproduction in the Dampier Archipelago, northern Western Australia	Seasonality of coral reproduction in the Dampier Archipelago, northern Western Australia	Coral spawning in Western Australia (WA) occurs predominantly in the austral autumn in contrast to the Great Barrier Reef (GBR) on Australias east coast where most spawning occurs in spring. Recent work, however, suggests a second spawning period in northern WA with at least 16 Acropora spp spawning in spring or early summer. This discovery has initiated a re-examination of reproductive seasonal…	0	1	0	1	Australia and NZ	NA	Baird-2011-Seasonality of coral reproduction i.pdf	4	Australia and NZ	Australia	Australia	Australia	Australia
114	Baker	2008	100	Baker-2008-Climate change and coral reef bleac.pdf	Climate change and coral reef bleaching: An ecological assessment of long-term impacts, recovery trends and future outlook	Climate change and coral reef bleaching: An ecological assessment of long-term impacts, recovery trends and future outlook	Since the early 1980s, episodes of coral reef bleaching and mortality, due primarily to climate-induced ocean warming, have occurred almost annually in one or more of the worlds tropical or subtropical seas. Bleaching is episodic, with the most severe events typically accompanying coupled oceanatmosphere phenomena, such as the El Nino-Southern Oscillation (ENSO), which result in sustained regi…	0	1	0	1	Non-specific	NA	Baker-2008-Climate change and coral reef bleac.pdf	3	North America	USA	USA	USA
115	Bakun	2008	101	Bakun-2008-The marine ecosystem off Peru_ What.pdf	The marine ecosystem off Peru: What are the secrets of its fishery productivity and what might its future hold?	The marine ecosystem off Peru: What are the secrets of its fishery productivity and what might its future hold?	The marine ecosystem located off the coast of central and northern Peru has stood as the worlds champion producer, by far, of exploitable fish biomass, generally yielding more than 20 times the tonnage of fishery landings produced by other comparable regional large marine ecosystems of the worlds oceans that operate under similar dynamic contexts and are characterized by comparable, or even …	0	0	1	1	South America	NA	Bakun-2008-The marine ecosystem off Peru_ What.pdf	2	North America	USA	Australia
116	Baldock	2014	102	Baldock-2014-Accurately estimating local water.pdf	Accurately estimating local water temperature from remotely sensed satellite sea surface temperature: A near real-time monitoring tool for marine protected areas	Accurately estimating local water temperature from remotely sensed satellite sea surface temperature: A near real-time monitoring tool for marine protected areas	Near real-time observation of sea temperature is an important management tool for monitoring the impacts associated with a changing climate on a range of marine communities particularly within marine protected areas. However, limitations exist when using data derived from satellite remote sensing as virtual stations are usually distant from areas of interest for management. Modelled sea surface t…	0	1	0	1	Australia and NZ	NA	Baldock-2014-Accurately estimating local water.pdf	5	Australia and NZ	Australia	Australia	Australia	Australia	Australia
117	Baltzer	2004	103	Baltzer-2004-Material exchange between the con.pdf	Material exchange between the continental shelf and mangrove-fringed coasts with special reference to the Amazon_Guias coast	NA	Mangrove-fringed coasts are a major coastal environment in the tropics that exchange enormous quantities of inorganic and organic materials and dissolved ions with the adjacent ocean in unique ways. The 1,600 km long Guiana coast, from the Amazon River mouth to the Orinoco, the worlds most extensive example, is exposed to significant oceanic wave and tidal energy but is almost exclusively compos…	0	0	1	1	South America	NA	Baltzer-2004-Material exchange between the con.pdf	3	Europe	France	USA	France
10		2011	104	Ban-2011-Designing, implementing and maging.pdf		NA	Coral reefs are in dire need of effective governance, yet the science and planning of coral reef protected areas largely stem from wealthy, developed nations, with very different social, economic, and cultural characteristics than the nations in which most coral reefs occur. Much has been written about coral reefs and the use of marine protected areas (MPAs) as a management tool, but emerging tre…	0	0	1	1	Non-specific	NA	Ban-2011-Designing	9	Australia and NZ	Australia	Australia	Australia	Australia	Australia	Australia	Australia	Australia	USA
118	Banerjee	2012	105	Banerjee-2012-Hydrochemical alysis to evalua.pdf	Hydrochemical alysis to evaluate the seawater ingress in a small coral island of India	Hydrochemical analysis to evaluate the seawater ingress in a small coral island of India	The sustainable development of the limited groundwater resources in the tropical island requires a thorough understanding of detail hydrogeological regime including the hydrochemical behavior of groundwater. Detail analysis of chemical data of groundwater helps in assessing the different groundwater zone affected by formation as well as sea water. Groundwater and saline water interaction is bette…	0	1	0	1	Southwest Asia	NA	Banerjee-2012-Hydrochemical analysis to evalua.pdf	5	Southwest Asia	India	India	India	India	India
120	Baran	1998	106	Baran-1999-Mangrove conservation and coastal m.pdf	Mangrove Conservation and Coastal 5 in Southeast Asia: What Impact on Fishery Resources?	NA	This paper focuses on relationships between mangroves and coastal ®sh resources. A review of the literature highlights the lack of quanti®ed relationships. We show that mangroves can be considered as a particular case of an estuarine environment, and then address the broader issue of the relationships between tropical estuaries and ®shery resources. An estuarine ®sh community is com- posed of thr…	0	0	1	1	Southeast Asia	NA	Baran-1999-Mangrove conservation and coastal m.pdf	2	Europe	France	Thailand
13		2012	107	Barbosa - 2012- FORAMINIFER-BASED CORAL REEF HEALTH ASSESSMENT FOR SOUTHWESTERN ATLANTIC OFFSHORE ARCHIPELAGOS, BRAZIL.PDF		NA	Benthic foraminiferal assemblages can indicate the ecological status of coral-reef ecosystems. Their functional groups have been used to calculate the previously published FORAM Index (FI), which is based on total counts (living and dead) to indicate whether an environment is suitable to support prolific calcification by organisms that are dependent upon algal endosymbionts. Sediment was sampled …	0	1	0	1	Non-specific	NA	Barbosa - 2012- FORAMINIFER-BASED CORAL REEF HEALTH ASSESSMENT FOR SOUTHWESTERN ATLANTIC OFFSHORE ARCHIPELAGOS	7	South America	Brazil	Brazil	Brazil	Brazil	Brazil	Brazil	Brazil
124	Bartlett	2009	108	Bartlett-2009-Comparison of outcomes of perman.pdf	Comparison of Outcomes of Permanently Closed and Periodically Harvested Coral Reef Reserves	Comparison of outcomes of permanently closed and periodically harvested coral reef reserves	In many areas of the developing world, the establishment of permanent marine reserves is inhibited by cultural norms or socioeconomic pressures. Community conserved areas that are periodically harvested are increasingly being implemented as fisheries management tools, but few researchers have empirically compared them with permanently closed reserves. We used a hierarchal control-impact experimen…	0	0	1	1	Pacific Islands	NA	Bartlett-2009-Comparison of outcomes of perman.pdf	7	Australia and NZ	Australia	Vanuatu	Australia	Australia	Vanuatu	Australia	Australia
134	Beckley	2011	109	Beckley_Systematic(2011).pdf	A systematic evaluation of the incremental protection 2 of broad-scale habitats at Ningaloo Reef, Western 3 Australia	NA	Incremental increases to marine conservation areas in response to changing goals, policy, threats or new information are common practice world-wide. Ningaloo Reef, in north-western Australia, is protected by the Ningaloo Marine Park (State Waters) which was expanded incrementally in 2004 so that 34% of the park now comprises no-take sanctuary zones. To test the hypothesis that all habitats (benth…	0	0	1	1	Australia and NZ	NA	Beckley_Systematic(2011).pdf	2	Australia and NZ	Australia	South Africa
135	Beger	2005	110	Beger-2004-A framework of lessons learned from.pdf	A Framework of Lessons Learned from Community- Based Marine Reserves and Its Effectiveness in Guiding a New Coastal 5 Initiative in the Philippines	NA	Community-based coastal resource management has been widely applied within the Philippines. However, smallscale community-based reserves are often inefficient owing to management inadequacies arising because of a lack of local support or enforcement or poor design. Because there are many potential pitfalls during the establishment of even small community- based reserves, it is important for coast…	0	0	1	1	Southeast Asia	NA	Beger-2004-A framework of lessons learned from.pdf	5	Australia and NZ	Australia	UK	Philippines	UK	Philippines
136	Behringer	2006	111	Behringer-2006-Stable isotope alysis of prod.pdf	Stable isotope alysis of production and trophic relationships in a tropical marine hard-bottom community	Stable isotope analysis of production and trophic relationships in a tropical marine hard-bottom community	Seagrasses produce much of the organic carbon in the shallow waters of the Caribbean and it has long been assumed that a substantial portion of this carbon is exported to nearby habitats, contributing substantially to their food webs. In the shallow coastal waters of the Florida Keys (USA), seagrass intersperses with hardbottom habitat where bushy, red macroalgae are the most prominent primary pr…	0	1	0	1	Caribbean	NA	Behringer-2006-Stable isotope analysis of prod.pdf	2	North America	USA	USA
137	Bell	2013	112	Bell-2013-Mixed responses of tropical Pacific1.pdf	Mixed responses of tropical Pacific fisheries and aquaculture to climate change	Mixed responses of tropical Pacific fisheries and aquaculture to climate change	Pacific Island countries have an extraordinary dependence on fisheries and aquaculture. Maintaining the benefits from the sector is a difficult task, now made more complex by climate change. Here we report how changes to the atmosphereocean are likely to affect the food webs, habitats and stocks underpinning fisheries and aquaculture across the region.We found winners and loserstuna are expecte…	0	0	1	1	Pacific Islands	NA	Bell-2013-Mixed responses of tropical Pacific1.pdf	16	Pacific Islands	New Caledonia	New Caledonia	Australia	Australia	Australia	Australia	Australia	New Caledonia	France	Australia	Australia	Fiji	Australia	Australia	France	Australia
139	Bellwood	2012	113	Bellwood-2012-Coral recovery may not herald th.pdf	Coral recovery may not herald the return of Wshes on damaged coral reefs	Coral recovery may not herald the return of fishes on damaged coral reefs	The dynamic nature of coral reefs oV ers a rare opportunity to examine the response of ecosystems to disruption due to climate change. In 1998, the Great Barrier Reef experienced widespread coral bleaching and mortality. As a result, cryptobenthic W sh assemblages underwent a dramatic phase-shift. Thirteen years, and up to 96 W sh generations later, the cryptobenthic W sh assemblage has not retur…	0	0	1	1	Australia and NZ	NA	Bellwood-2012-Coral recovery may not herald th.pdf	7	Australia and NZ	Australia	Australia	Australia	Australia	Saudi Arabia	Australia	Australia
140	Beman	2007	114	Beman-2007-Distribution and diversity of archa.pdf	Distribution and Diversity of Archaeal Ammonia Monooxygese Genes Associated with Corals	Distribution and diversity of archaeal ammonia monooxygenase genes associated with corals	Corals are known to harbor diverse microbial communities of Bacteria and Archaea, yet the ecological role of these microorganisms remains largely unknown. Here we report putative ammonia monooxygenase subunit A (amoA) genes of archaeal origin associated with corals. Multiple DNA samples drawn from nine coral species and four different reef locations were PCR screened for archaeal and bacterial am…	0	1	0	1	Central America	NA	Beman-2007-Distribution and diversity of archa.pdf	5	North America	USA	USA	USA	USA	USA
145	Bennett	2005	115	Bennett-1993-The value of a mangrove area in S.pdf	Adaptive magement and its role in maging Great Barrier Reef water quality	NA	Many arguments have been presented to justify the conservation of tropical forests. In the case of mangrove forests, their preservation can be argued using economic and employment grounds alone. A case study of the Sarawak Mangroves Forest Reserve, Malaysia is presented. Here, the mangroves support marine fisheries worth US$21.1 million p.a. and up to 3000 jobs, timber products worth US$123,217 p…	0	1	0	1	Australia and NZ	NA	Bennett-1993-The value of a mangrove area in S.pdf	2	Southeast Asia	Malaysia	Malaysia
144	Bennett	2003	116	Bennett-2005-Adaptive magement and its role.pdf	The value of a mangrove area in Sarawak	NA	Adaptive management is the pathway to effective conservation, use and management of Australia s coastal catchments and waterways. While the concepts of adaptive management are not new, applications involving both assessment and management responses are indeed limited at the national and regional scales. This paper outlines the components of a systematic framework for linking scientific knowledge,…	0	1	0	1	Southeast Asia	NA	Bennett-2005-Adaptive management and its role.pdf	4	Australia and NZ	Australia	Australia	Australia	Australia
77	Anderson	2011	117	Benthic-and-Fish-Population-Monitoring-in-an-MPA-in-Greda-2012.pdf	SCUBA Diver Specialization and Behavior Norms at Coral Reefs	SCUBA diver specialization and behavior norms at coral reefs	Annual benthic and fish population surveys were completed at five locations in the nearshore waters along Grenada´s southwest coast during 2008 - 2010. Two survey sites are located in a newly launched Marine Protected Area (MPA). Photo Quadrat (PQ) and Point Line Intercept (PLI) surveys were used to determine substrate cover. Algae was the primary live cover increasing significantly from 45.9% in…	0	0	1	1	Caribbean	NA	Benthic-and-Fish-Population-Monitoring-in-an-MPA-in-Grenada-2012.pdf	6	North America	USA	Grenada	Grenada	USA	USA	USA
149	Berger	2013	118	Berger-2013-The dymics of mangrove ecosystem.pdf	The dymics of mangrove ecosystems, changes in sea level and the strategies of Neolithic settlements along the coast of Oman (6000e3000 cal. BC)	The dynamics of mangrove ecosystems, changes in sea level and the strategies of Neolithic settlements along the coast of Oman (6000-3000cal.BC)	This paper focus on the Holocene palaeogeography of the Jaalan coast from the 6th to the 4th millennium cal. BC, integrating the dynamics of mangroves, lagoons, khors-estuaries and deltas, with sea-level change and the evidence from Neolithic shell middens. The distribution and maturation of mangrove ecosystems along the Arabian coasts has varied considerably, affected by physical forces such as…	0	0	1	1	Southwest Asia	NA	Berger-2013-The dynamics of mangrove ecosystem.pdf	6	Europe	France	France	France	France	France	Spain
150	Berkstr_m	2012	119	BerkstroÌm-2012-Exploring 'knowns' and 'unknown.pdf	Exploring ¥knowns and ¥unknowns in tropical seascape connectivity with insights from East African coral reefs	NA	Applying a broader landscape perspective to understand spatio-temporal changes in local populations and communities has been increasingly used in terrestrial systems to study effects of human impact and land use change. With todays major declines in fishery stocks and rapid degradation of natural coastal habitats, the understanding of habitat configuration and connectivity over relevant temporal…	0	1	0	1	Eastern Africa	NA	Berkstro?m-2012-Exploring 'knowns' and 'unknown.pdf	7	Europe	Sweden	Sweden	Sweden	Sweden	Sweden	Sweden	Sweden
152	Bertrand	2011	120	Bertrand-2011-Oxygen_ A fundamental property r.pdf	Oxygen: A Fundamental Property Regulating Pelagic 4 Structure in the Coastal Southeastern Tropical Pacific	Oxygen: A fundamental property regulating pelagic ecosystem structure in the coastal southeastern tropical pacific	Background: In the southeastern tropical Pacific anchovy (Engraulis ringens) and sardine (Sardinops sagax) abundance have recently fluctuated on multidecadal scales and food and temperature have been proposed as the key parameters explaining these changes. However, ecological and paleoecological studies, and the fact that anchovies and sardines are favored differently in other regions, raise ques…	0	0	1	1	South America	NA	Bertrand-2011-Oxygen_ A fundamental property r.pdf	7	Europe	France	Peru	Peru	Peru	Peru	Peru	USA
153	Berzunza-Sanchez	2013	121	Berzunza-Sanche-2013-Historical patterns of re.pdf	Historical Patterns of Resource Exploitation and the Status of Papua New Guinea Coral Reefs	Historical patterns of resource exploitation and the status of papua New Guinea Coral reefs	Understanding human drivers of exploitation within the context of historical baselines can assist in better management of natural resources. Retrospective studies provide insight into the scale, nature, and timing of human influence on reef ecosystems. Using Papua New Guinea as a model, we assessed human influences on the historical status of reef resources through time. Reef resources were divid…	0	1	0	1	Pacific Islands	NA	Berzunza-Sanche-2013-Historical patterns of re.pdf	3	Australia and NZ	Australia	Australia	Australia
154	Beyrend-Dur	2011	122	Beyrend-Dur-2011-Demographic parameters of adu.pdf	Demographic parameters of adults of Pseudodiaptomus anndalei (Copepoda: Calanoida): Temperature_salinity and generation effects	Demographic parameters of adults of Pseudodiaptomus annandalei (Copepoda: Calanoida): Temperature-salinity and generation effects	The calanoid copepod Pseudodiaptomus annandalei is distributed exclusively in the Indo-Pacific regions from subtropical to tropical estuaries and shallow coastal waters. Its population dynamics is not well understood despite its ecological importance to natural ecosystems and potential applications to aquaculture. We studied the combined effects of temperature and salinity on survivorship and rep…	0	0	1	1	East Asia	NA	Beyrend-Dur-2011-Demographic parameters of adu.pdf	6	East Asia	Taiwan	Taiwan	India	France	Taiwan	Taiwan
155	Bezerra	2010	123	Bezerra-2010-Cultivation of the red seaweed Gr.pdf	Cultivation of the red seaweed Gracilaria birdiae (Gracilariales, Rhodophyta) in tropical waters of northeast Brazil	Cultivation of the red seaweed Gracilaria birdiae (Gracilariales, Rhodophyta) in tropical waters of northeast Brazil	The exploitation of macroalgae of the genus Gracilaria for agar extraction has increased significantly in recent decades. In Brazil, Gracilaria birdiae is one of the species exploited commercially by fishing communities and the excess harvesting of seaweeds of this genus has had negative consequences on the sustainability of this natural resource. Thus, the aim of this study was to gather basic i…	0	1	0	1	South America	NA	Bezerra-2010-Cultivation of the red seaweed Gr.pdf	2	South America	Brazil	Brazil
158	BIGMI	2013	124	Bigmi-2013-Response to ocean acidification i.pdf	Response to ocean acidification in larvae of a large tropical marine fish, Rachycentron cadum	NA	Currently, ocean acidification is occurring at a faster rate than at any time in the last 300 million years, posing an ecological challenge to marine organisms globally. There is a critical need to understand the effects of acidification on the vulnerable larval stages of marine fishes, as there is potential for large ecological and economic impacts on fish populations and the human economies tha…	0	1	0	1	Caribbean	NA	Bignami-2013-Response to ocean acidification i.pdf	3	North America	USA	USA	USA
159	Bigot	2008	125	Bigot-2008-Assessment of the ecological qualit.pdf	Assessment of the ecological quality status of soft-bottoms in Reunion Island (tropical Southwest Indian Ocean) using AZTI marine biotic indices	Assessment of the ecological quality status of soft-bottoms in Reunion Island (tropical Southwest Indian Ocean) using AZTI marine biotic indices	The ability of the two synthetic marine biotic indices, AMBI and M-AMBI, to account for changes in the ecological quality of coastal soft bottoms of Reunion Island according to disturbances was assessed from macrobenthic samples collected in five sectors between 1994 and 2004. Samples were collected under non-perturbed conditions and at two sites subjected to heavy organic enrichment. Both indice…	0	1	0	1	Non-specific	NA	Bigot-2008-Assessment of the ecological qualit.pdf	6	Europe	France	France	France	France	France	France
19		2013	126	Bijoux-2013-Temporal dymics, residency and s.pdf		NA	The shoemaker spinefoot Siganus sutor is a fast-growing, short-lived, gonochorist and herbivorous reef fish that forms transient fish spawning aggregations (FSAs). In the Seychelles, FSAs of this species occur monthly between September and June around the full moon. To study the spawning aggregation dynamics of S. sutor, 39 reproductively active individuals were acoustically tagged and monitored …	0	0	1	1	Non-specific	NA	Bijoux-2013-Temporal dynamics	7	Southwest Asia	Seychelles	Seychelles	Seychelles	South Africa	La Reunion	French Polynesia	Australia
160	Bird	2011	127	Bird-2011-Diversification of sympatric broadca.pdf	Diversification of sympatric broadcast-spawning limpets (Cella spp.) within the Hawaiian archipelago	Diversification of sympatric broadcast-spawning limpets (Cellana spp.) within the Hawaiian archipelago	Speciation remains a central enigma in biology, and nowhere is this more apparent than in shallow tropical seas where biodiversity rivals that of tropical rainforests. Obvious barriers to gene flow are few and most marine species have a highly dispersive larval stage, which should greatly decrease opportunities for speciation via geographic isolation. The disparity in the level of geographic isol…	0	1	0	1	Hawaii	NA	Bird-2011-Diversification of sympatric broadca.pdf	4	North America	USA	USA	USA	USA
162	Blythe	2012	128	Blythe-2012-Knowledge integration as a method.pdf	8 integration as a method to develop capacity for evaluating technical information on biodiversity and ocean currents for integrated coastal magement	Knowledge integration as a method to develop capacity for evaluating technical information on biodiversity and ocean currents for integrated coastal management	An approach to coastal management has been proposed that will better address important socialenvironmental problems, using a concept called knowledge integration. Knowledge integration involves bridging previously distinct technical subject areas to allow holistic, generally better, and more effective environmental policy. Science-management integration is a specific type of integration which ma…	0	1	0	1	Non-specific	NA	Blythe-2012-Knowledge integration as a method.pdf	2	North America	USA	USA
163	Boaden	2015	129	Boaden-2015-Predators drive community structur.pdf	Predators drive community structure in coral reef fish assemblages	NA	The importance of top-down effects in structuring ecological communities has been widely debated by ecologists. One way in which to examine these processes is to study the secondary effects of predator removal on communities. This study examined the role of predatory fishes in structuring communities of coral reef fishes, by using a network of marine reserves (the Great Barrier Reef Marine Park) …	0	1	0	1	Australia and NZ	NA	Boaden-2015-Predators drive community structur.pdf	2	Australia and NZ	Australia	Australia
9		2011	130	Boehm-2011-Dissolved Inorganic Nitrogen, Solub.pdf		NA	This study quantifies dissolved inorganic nitrogen (DIN), soluble reactive phosphorous (SRP), and microbial pollutant inputs to a tropical embayment, Hanalei Bay, Kaua'i, Hawai'i from rural watersheds during two field excursions during non-storm conditions. We employ land cover analysis and a suite of nucleic acid fecal source tracking markers (host-specific Bacteroidales and human enterovirus) t…	0	1	0	1	Non-specific	NA	Boehm-2011-Dissolved Inorganic Nitrogen	8	North America	USA	USA	USA	USA	USA	USA	USA	USA
164	Bolog	2008	131	Bolog-2008-Assessment of turtle grass (Thala.pdf	Assessment of turtle grass (Thalassia testudinum ex Banks Konig) community structure in a UNESCO Biosphere Reserve	NA	Tropical turtle grass beds (Thalassia testudinum) were investigated in an UNESCO Biosphere Reserve in St. Johns Island, United States Virgin Islands. Four coastal bays were studied to assess floral characteristics, benthic invertebrate density and secondary production. These bays varied with respect to oceanic exposure and anthropogenic stresses. Results indicate that Coral Bay Harbor, the most a…	0	1	0	1	Caribbean	NA	Bologna-2008-Assessment of turtle grass (Thala.pdf	4	North America	USA	USA	USA	USA
165	Bongiorni	2011	132	Bongiorni-2011-First step in the restoration o.pdf	First step in the restoration of a highly degraded coral reef (Singapore) by in situ coral intensive farming	First step in the restoration of a highly degraded coral reef (Singapore) by in situ coral intensive farming	While ecological roles, ecosystem services and economic values of coral reefs worldwide are threatened by increasing anthropogenic and environmental pressures, the best management tools currently employed to offset reefs degradation do not achieve conservation objectives. There is therefore an urgent need to develop alternative instruments, focused on active management acts. In this study the app…	0	0	1	1	Southeast Asia	NA	Bongiorni-2011-First step in the restoration o.pdf	6	Europe	Italy	Italy	Israel	Italy	Singapore	Italy
166	Bonnet	2014	133	Bonnet-2014-Coastal nurseries and their import.pdf	Coastal Nurseries and Their Importance for Conservation of Sea Kraits	Coastal nurseries and their importance for conservation of Sea Kraits	Destruction and pollution of coral reefs threaten these marine biodiversity hot stops which shelter more than two thirds of sea snake species. Notably, in many coral reef ecosystems of the Western Pacific Ocean, large populations of sea kraits (amphibious sea snakes) have drastically declined during the past three decades. Protecting remaining healthy populations is thus essential. In New Caledon…	0	0	1	1	Pacific Islands	NA	Bonnet-2014-Coastal nurseries and their import.pdf	5	Europe	France	France	New Caledonia	France	France
169	Bos	2014	134	Bos-2014-Effective marine offsets for the Grea.pdf	Effective marine offsets for the Great Barrier Reef World Heritage Area	Effective marine offsets for the Great Barrier Reef World Heritage Area	Biodiversity offsets are a prevalent mechanism to compensate for development impacts to natural resources, but the appropriateness and efficacy of offsets remain the subjects of research and debate. Effective offsets for impacts to marine resources present even more challenges than those for terrestrial impacts. The Great Barrier Reef World Heritage Area is globally valuable for both biodiversity…	0	1	0	1	Australia and NZ	NA	Bos-2014-Effective marine offsets for the Grea.pdf	3	Australia and NZ	Australia	Australia	Australia
170	Bottema	2012	135	Bottema-2012-The durability of private sector-.pdf	The durability of private sector-led marine conservation: A case study of two entrepreneurial marine protected areas in Indonesia	The durability of private sector-led marine conservation: A case study of two entrepreneurial marine protected areas in Indonesia	This paper investigates the durability of entrepreneurial marine protected areas (EMPAs) by exploring the role of the private sector in marine conservation. Set within a wider set of social science questions around the marine protected areas as negotiated interventions, we focus on whether and how tourism entrepreneurs can instill a long-term vision for marine conservation, funding and management…	0	1	0	1	Southeast Asia	NA	Bottema-2012-The durability of private sector-.pdf	2	Europe	Netherlands	Netherlands
171	Bouchet	2002	136	Bouchet-2002-Assessing the magnitude of specie.pdf	Assessing the magnitude of species richness in tropical marine environments: exceptiolly high numbers of molluscs at a New Caledonia site	Assessing the magnitude of species richness in tropical marine environments: Exceptionally high numbers of molluscs at a New Caledonia site	Earlier studies in the tropical Indo-Pacific have grossly underestimated the richness of macrofauna species at spatial scales relevant to conservation and management as a result of insufficient collecting and sorting effort. A massive collecting effort involving 400 day-persons at 42 discrete stations on a 295-km2 site on the west coast of New Caledonia, south-west Pacific, revealed 2738 species …	0	1	0	1	Pacific Islands	NA	Bouchet-2002-Assessing the magnitude of specie.pdf	4	Europe	France	France	France	France
172	Bouma	2011	137	Bouma-2011-Assessing the value of Earth Observ.pdf	Assessing the value of Earth Observation for maging coral reefs: An example from the Great Barrier Reef	Assessing the value of Earth Observation for managing coral reefs: An example from the Great Barrier Reef	The Integrated Global Observing Strategy (IGOS, 2003) argues that further investments in Earth Observation information are required to improve coral reef protection worldwide. The IGOS Strategy does not specify what levels of investments are needed nor does it quantify the benefits associated with better-protected reefs. Evaluating costs and benefits is important for determining optimal investmen…	0	0	1	1	Australia and NZ	NA	Bouma-2011-Assessing the value of Earth Observ.pdf	2	Europe	Netherlands	Australia
180	Brewer	2009	138	Brewer-2009-Thresholds and multiple scale inte.pdf	Thresholds and multiple scale interaction of environment, resource use, and market proximity on reef fishery resources in the Solomon Islands	Thresholds and multiple scale interaction of environment, resource use, and market proximity on reef fishery resources in the Solomon Islands	Reef fish are critical in maintaining the ecological function of coral reefs and providing food security for coastal communities in developing countries. Reef fishery stocks are under increasing threat from factors such as climate-related habitat degradation, land use practices, and resource extraction related to human population growth, direct consumption and increasing connectivity between the …	0	1	0	1	Pacific Islands	NA	Brewer-2009-Thresholds and multiple scale inte.pdf	5	Australia and NZ	Australia	Australia	Australia	Australia	Australia
181	Britayev	2013	139	Britayev-2013-Symbiotic assemblage associated.pdf	Symbiotic assemblage associated with the tropical sea urchin, Salmacis bicolor (Echinoidea:Temnopleuridae) in the An Thoi archipelago, Vietm	Symbiotic assemblage associated with the tropical sea urchin, Salmacis bicolor (Echinoidea:Temnopleuridae) in the An Thoi archipelago, Vietnam	The symbiotic assemblage associated with the tropical sea urchin, Salmacis bicolor was studied in the An Thoi archipelago, Vietnam. Five species of macrosymbionts were found on the surface of this echinoid host, including the polychaete, Ophiodromus sp. 3 (Hesionidae), gastropod, Vitreobalcis sp. (Eulimidae), shrimp, Allopontonia iaini (Palaemonidae), crab, Zebrida adamsii (Pilumnidae), and Ophiu…	0	1	0	1	Southeast Asia	NA	Britayev-2013-Symbiotic assemblage associated.pdf	3	Europe	Russia	Russia	Russia
7		2009	140	Brock-2009-The Emerging Role of Lidar Remote S.pdf		NA	Knowledge of coastal elevation is an essential requirement for resource management and scientific research. Recognizing the vast potential of lidar remote sensing in coastal studies, this Special Issue includes a collection of articles intended to represent the state-of-the-art for lidar investigations of nearshore submerged and emergent ecosystems, coastal morphodynamics, and hazards due to sea-…	0	1	0	1	Non-specific	NA	Brock-2009-The Emerging Role of Lidar Remote S.pdf	2	North America	USA	USA
183	Brodie	2009	141	Brodie-2009-Target setting for pollutant disch.pdf	^Target setting for pollutant discharge magement of rivers in the Great Barrier Reef catchment area	Target setting for pollutant discharge management of rivers in the Great Barrier Reef catchment area	Water Quality Improvement Plans (WQIPs) are being developed for individual river basins on the Great Barrier Reef (GBR) catchment associated with the GBR Water Quality Protection Plan. Within each WQIP, marine ecosystem targets are linked to end-of-river pollutant (suspended sediments, nutrients and pesticides) load targets and to farm level management practice targets.The targets are linked thro…	0	1	0	1	Australia and NZ	NA	Brodie-2009-Target setting for pollutant disch.pdf	6	Australia and NZ	Australia	Australia	Australia	Australia	Australia	Australia
184	Brodie	2012	142	Brodie-2012-Terrestrial pollutant runoff to th.pdf	Terrestrial pollutant runoff to the Great Barrier Reef: An update of issues, priorities and magement responses	Terrestrial pollutant runoff to the Great Barrier Reef: An update of issues, priorities and management responses	The Great Barrier Reef (GBR) is a World Heritage Area and contains extensive areas of coral reef, seagrass meadows and fisheries resources. From adjacent catchments, numerous rivers discharge pollutants from agricultural, urban, mining and industrial activity. Pollutant sources have been identified and include suspended sediment from erosion in cattle grazing areas; nitrate from fertiliser applic…	0	1	0	1	Australia and NZ	NA	Brodie-2012-Terrestrial pollutant runoff to th.pdf	10	Australia and NZ	Australia	Australia	Australia	Australia	Australia	Australia	Australia	Australia	Australia	Australia
186	Brook	2009	143	Brook-2009-Can land crabs be used as a rapid e.pdf	Can land crabs be used as a rapid ecosystem evaluation tool? A test using distribution and abundance of several genera from the Seychelles	Can land crabs be used as a rapid ecosystem evaluation tool? A test using distribution and abundance of several genera from the Seychelles	Habitat destruction and the introduction of exotic species are the primary causes of biodiversity loss in tropical island ecosystems. Conservation efforts on oceanic islands are often biased towards charismatic vertebrate faunas, neglecting invertebrate assemblages. We sampled the land crab community on five islands in the central Seychelles; in the intertidal zone, in the supralittoral zone and …	0	1	0	1	Eastern Africa	NA	Brook-2009-Can land crabs be used as a rapid e.pdf	3	Europe	UK	UK	UK
188	Brown	2014	144	Brown-2011-Increased sea level promotes coral.pdf	Trade-offs between fisheries and the conservation of ecosystem function are defined by magement strategy	NA	Sea level in the Indian Ocean is subject to considerable temporal and spatial variabilities. During the period 19602009 at Phuket, Thailand, in the NE Indian Ocean, mean sea level increased by 2.7 mm y-1 . Regular monitoring of coral cover on fringing reef flats at Phuket since 1979 revealed a sensitive response of this habitat to both transient sea-level depressions and sea-level elevation. Sin…	0	0	1	1	Non-specific	NA	Brown-2011-Increased sea level promotes coral.pdf	5	Europe	UK	UK	UK	Thailand	UK
187	Brown	2011	145	Brown-2014-Trade-offs between fisheries and th.pdf	Increased sea level promotes coral cover on shallow reef flats in the Andaman Sea, eastern Indian OceanBr	Increased sea level promotes coral cover on shallow reef flats in the Andaman Sea, eastern Indian Ocean	Efforts to conserve marine biodiversity must move beyond conserving individual species within protected areas and seek to preserve the functional roles that species perform in ecosystems across seascapes. For instance, herbivorous and predatory (including invertebrate-feeding) fish are critical for maintaining coralreef habitat and the diversity of dependent fish assemblages. However, increasing …	0	1	0	1	Southeast Asia	NA	Brown-2014-Trade-offs between fisheries and th.pdf	2	Australia and NZ	Australia	Australia
191	Browne	2012	146	Browne-2012-A Field-Based technique for measur.pdf	A Field-Based Technique for Measuring Sediment Flux on Coral Reefs: Application to Turbid Reefs on the Great Barrier Reef	Coral reefs of the turbid inner-shelf of the Great Barrier Reef, Australia: An environmental and geomorphic perspective on their occurrence, composition and growth	Inshore turbid reefs on the Great Barrier Reef (GBR) are exposed to high and fluctuating sediment loads normally associated with poor reef growth, but many have high coral cover (.30%) and diversity (.50 species). Previous assessments of sediment regimes on these reefs have largely relied on sediment trap data, which overestimate sedimentation rates and may not accurately reflect sedimentary cond…	0	0	1	1	Australia and NZ	NA	Browne-2012-A Field-Based technique for measur.pdf	4	Australia and NZ	Australia	Australia	UK	Australia
192	Browne	2012	146	Browne-2012-A Field-Based technique for measur.pdf	A Field-Based Technique for Measuring Sediment Flux on Coral Reefs: Application to Turbid Reefs on the Great Barrier Reef	A Field-Based technique for measuring sediment flux on coral reefs: Application to turbid reefs on the great barrier reef	Inshore turbid reefs on the Great Barrier Reef (GBR) are exposed to high and fluctuating sediment loads normally associated with poor reef growth, but many have high coral cover (.30%) and diversity (.50 species). Previous assessments of sediment regimes on these reefs have largely relied on sediment trap data, which overestimate sedimentation rates and may not accurately reflect sedimentary cond…	0	0	1	1	Australia and NZ	NA	Browne-2012-A Field-Based technique for measur.pdf	4	Australia and NZ	Australia	Australia	UK	Australia
189	Browne	2012	147	Browne-2012-Coral reefs of the turbid inner-sh.pdf	Coral reefs of the turbid inner-shelf of the Great Barrier Reef, Australia: An environmental and geomorphic perspective on their occurrence, composition and growth	Coral reefs of the turbid inner-shelf of the Great Barrier Reef, Australia: An environmental and geomorphic perspective on their occurrence, composition and growth	Inshore turbid reefs on the Great Barrier Reef (GBR) are exposed to high and fluctuating sediment loads normally associated with poor reef growth, but many have high coral cover (.30%) and diversity (.50 species). Previous assessments of sediment regimes on these reefs have largely relied on sediment trap data, which overestimate sedimentation rates and may not accurately reflect sedimentary cond…	0	0	1	1	Australia and NZ	NA	Browne-2012-Coral reefs of the turbid inner-sh.pdf	3	Australia and NZ	Australia	Australia	UK
190	Browne	2012	147	Browne-2012-Coral reefs of the turbid inner-sh.pdf	Coral reefs of the turbid inner-shelf of the Great Barrier Reef, Australia: An environmental and geomorphic perspective on their occurrence, composition and growth	A Field-Based technique for measuring sediment flux on coral reefs: Application to turbid reefs on the great barrier reef	Inshore turbid reefs on the Great Barrier Reef (GBR) are exposed to high and fluctuating sediment loads normally associated with poor reef growth, but many have high coral cover (.30%) and diversity (.50 species). Previous assessments of sediment regimes on these reefs have largely relied on sediment trap data, which overestimate sedimentation rates and may not accurately reflect sedimentary cond…	0	0	1	1	Australia and NZ	NA	Browne-2012-Coral reefs of the turbid inner-sh.pdf	3	Australia and NZ	Australia	Australia	UK
194	Bruschi	2014	148	Bruschi-2014-Genetic and morphological variati.pdf	Genetic and morphological variation of Rhizophora mangle (red mangrove) along the northern Pacifi c coast of Nicaragua	Genetic and morphological variation of Rhizophora mangle (red mangrove) along the northern Pacific coast of Nicaragua	Red mangrove ( Rhizophora mangle ) dominates in tidally active areas of neotropical mangrove forests. Despite the ecological and economic importance of this species, we still know little about the genetic structure and diversity of its natural populations. In particular, Nicaraguan populations have not yet been investigated although they could be important for a better understanding of the evolut…	0	0	1	1	Central America	NA	Bruschi-2014-Genetic and morphological variati.pdf	5	Europe	Italy	Italy	Nicaragua	Italy	Italy
196	Buchan	2000	149	Buchan-2000-The Bahamas.pdf	The Bahamas	The Bahamas	The archipelago of the Bahamas contains the largest tropical shallow water area in the Western Atlantic. Lo- cated on the northern and eastern margins of two large submerged banks and a number of smaller more isolated banks, the Bahama Islands, of which there are over 700, are low-lying and composed of limestone. A sub-tropical climate and a geographic position between two major warm ocean curren…	1	0	0	1	Caribbean	NA	Buchan-2000-The Bahamas.pdf	1	Caribbean	Bahamas
21		2014	150	Bunt-2014-Movement, habitat utilization and be.pdf		NA	Coral trout Plectropomus leopardus (mean total length = 498.9 ± 19.7 mm, n = 10) were tagged and tracked with ultrasonic transmitters over 81 d at an intra-lagoonal location at One Tree Island, Great Barrier Reef, Australia (23.4979° S, 152.0712° E). Movement and habitat preferences were compared during the transition between the reproductive and post-reproductive period. Overall, mean movement w…	0	0	1	1	Non-specific	NA	Bunt-2014-Movement	2	North America	Canada	Australia
15		2013	151	Burt-2013-The continuing decline of coral reef.pdf		NA	Historically coral reefs of Bahrain were among the most extensive in the southern basin of the Arabian Gulf. However, Bahrains reefs have undergone significant decline in the last four decades as a result of large-scale coastal development and elevated sea surface temperature events. Here we quantitatively surveyed six sites including most major coral reef habitats around Bahrain and a reef loca…	0	0	1	1	Non-specific	NA	Burt-2013-The continuing decline of coral reef.pdf	5	Southwest Asia	UAE	Bahrain	Bahrain	Bahrain	Bahrain
434	Finlayson	2001	152	C. M. Finlayson-2001-Ecological Assessment and.pdf	Ecological Assessment and Monitoring of Coastal Wetlands in Australia's Wet- Dry Tropics: A Paradigm for Elsewhere?	Ecological assessment and monitoring of coastal wetlands in Australia's wet-dry tropics: A paradigm for elsewhere?	The Alligator Rivers Region in northern Australia is renowned for its habitat values but is under threat as a consequence of predicted climate change and sea level rise. In order to determine the likely extent and rate of change an assessment and monitoring framework for the coastal floodplain wetlands was designed. This resulted in a paradigm for developing a wetland assessment and monitoring pr…	0	1	0	1	Australia and NZ	NA	C. M. Finlayson-2001-Ecological Assessment and.pdf	2	Australia and NZ	Australia	Australia
201	Caballero-George	2010	153	Caballero_george_2010.pdf	Protocol to Isolate Sponge-associated Fungi from Tropical waters and an Examition of their Cardioprotective Potential	Protocol to isolate sponge-associated fungi from tropical waters and an examination of their cardioprotective potential	Fungi represent an essential component of biodiversity not only because of their high species richness at multiple scales, but also because of their ecological, evolutionary and socio-economic significance. Despite poorly understood natural history and uncertain estimates of diversity, marine fungi have been identified as a major source of new natural products with pharmacological applications. T…	0	0	1	1	Central America	NA	Caballero_george_2010.pdf	6	Central America	Panama	Panama	Panama	Mexico	Mexico	USA
200	CABALLERO	2012	154	Caballero-2012-Application of multiplex PCR ap.pdf	Application of multiplex PCR approaches for shark molecular identification: feasibility and applications for fisheries magement and conservation in the Eastern Tropical Pacific	NA	Here we describe the application of new and existing multiplex PCR methodologies for shark species molecular identification. Four multiplex systems (group ID, thresher sharks, hammerhead sharks and miscellaneous shark) were employed with primers previously described and some designed in this study, which allow for species identification after running PCR products through an agarose gel. This syst…	0	0	1	1	Central America	NA	Caballero-2012-Application of multiplex PCR ap.pdf	4	South America	Colombia	Colombia	Colombia	USA
207	Calhoun	2008	155	Calhoun-2008-Sand composition and transport hi.pdf	Sand Composition and Transport 11 on a Fringing Coral Reef, Molokai, Hawaii	NA	Composition of sand grains from the beaches, reef flat, and fore reef of south Molokai, Hawaii, provides key information about the origin and transport history of sediment on the reef and adjacent beach. The most common grain types include coralline algae, coral, chemically altered carbonate, and siliciclastic grains. Minor components include calcareous algal plates (Halimeda), mollusk fragments,…	0	1	0	1	Hawaii	NA	Calhoun-2008-Sand composition and transport hi.pdf	2	North America	USA	USA
209	Campbell	2012	156	Campbell-2012-Avoiding conflicts and protectin.pdf	Avoiding conflicts and protecting coral reefs: customary magement benefits marine habitats and fish biomass	Avoiding conflicts and protecting coral reefs: Customary management benefits marine habitats and fish biomass	One of the major goals of coral reef conservation is to determine the most eff ective means of managing marine resources in regions where economic conditions often limit the options available. For example, no-take fi shing areas can be impractical in regions where people rely heavily on reef fi sh for food. In this study we test whether coral reef health diff ered among areas with varying managem…	0	0	1	1	Southeast Asia	NA	Campbell-2012-Avoiding conflicts and protectin.pdf	11	Southeast Asia	Indonesia	Australia	Indonesia	Indonesia	Indonesia	Indonesia	Indonesia	Indonesia	Australia	Australia	Australia
210	Campbell	2014	157	Campbell-2014-Ocean acidification outweighs nu.pdf	Ocean acidification outweighs nutrient effects in structuring seagrass epiphyte communities	Ocean acidification outweighs nutrient effects in structuring seagrass epiphyte communities	1. Developing a framework for assessing interactions between multiple anthropogenic stressors remains an important goal in environmental research. In coastal ecosystems, the relative effects of aspects of global climate change (e.g. CO2 concentrations) and localized stressors (e.g. eutrophication), in combination, have received limited attention. 2. Using a long-term (11 month) field experiment, …	0	1	0	1	Caribbean	NA	Campbell-2014-Ocean acidification outweighs nu.pdf	2	North America	USA	USA
212	Capitini	2010	158	Capitini-2004-Competing perspectives in resour.pdf	Competing Perspectives in Resource Protection: The Case of Marine Protected Areas in West Hawai¥i	NA	This article examines a conflict involving the protection of coral reefs from aquarium fish collecting along the coast of western Hawaii. The involved parties included aquarium fish collectors, dive tour operators, Hawaii Division of Aquatic Resources, reef protection advocates, and administrative=legislature state actors. An attempt was made to resolve the controversy through a combination of …	0	1	0	1	Hawaii	NA	Capitini-2004-Competing perspectives in resour.pdf	5	North America	USA	USA	USA	USA	USA
214	Cappo	2004	159	Cappo-2004-Comparison of baited remote underwa.pdf	Comparison of baited remote underwater video stations (BRUVS) and prawn (shrimp) trawls for assessments of fish biodiversity in inter-reefal areas of the Great Barrier Reef Marine Park	Comparison of baited remote underwater video stations (BRUVS) and prawn (shrimp) trawls for assessments of fish biodiversity in inter-reefal areas of the Great Barrier Reef Marine Park	A field comparison of baited remote underwater video stations (BRUVS) and prawn (shrimp) trawls was made to assess the sampling options for describing patterns of fish biodiversity in the lagoonal waters of the Great Barrier Reef Marine Park. Replicated comparisons were made during the day and night on trawl grounds with different biophysical characteristics. Each trawl was made close and paralle…	0	1	0	1	Australia and NZ	NA	Cappo-2004-Comparison of baited remote underwa.pdf	3	Australia and NZ	Australia	Australia	Australia
216	Caras	2009	160	Caras-2009-Long-term environmental impact of c.pdf	Long-term environmental impact of coral mining at the Wakatobi marine park, Indonesia	Long-term environmental impact of coral mining at the Wakatobi marine park, Indonesia	Coral mining for use as construction material is a major cause of reef degradation in several coastal nations.We studied the long-term impact of coral mining at theWakatobi marine park, Indonesia, where a substantial mining event was undertaken two decades ago in order to supply building material for a jetty. The mined area shows significant differences in reef viability compared to a control ree…	0	0	1	1	Southeast Asia	NA	Caras-2009-Long-term environmental impact of c.pdf	2	Europe	UK	Israel
217	Carballo	2008	161	Carballo-2008-Short- and long-term patterns of.pdf	Short- and long-term patterns of sponge diversity on a rocky tropical coast: evidence of large-scale structuring factors	Short- and long-term patterns of sponge diversity on a rocky tropical coast: Evidence of large-scale structuring factors	The importance of a long-term ecological perspective is well documented, yet long-term data are not widely available. This paper represents the first quantitative description of sublittoral sponge assemblages over long temporal scales (6 years) along the coast of the East Pacific Ocean (Mazatlan Bay), with the goal of describing their levels of intra- and inter-annual variability, and their relat…	0	1	0	1	Central America	NA	Carballo-2008-Short- and long-term patterns of.pdf	7	Central America	Mexico	Mexico	Mexico	Mexico	Mexico	Mexico	Mexico
218	Carberry	2006	162	Carbery-2006-Contamition of Caribbean coasta.pdf	Contamition of Caribbean coastal waters by the antifouling herbicide Irgarol 1051	NA	Irgarol 1051 is a s-triazine herbicide used in popular slimeresistant antifouling paints. It has been shown to be acutely toxic to corals, mangroves and sea grasses, inhibiting photosynthesis at low concentrations (>50 ng l 1). We present the first data describing the occurrence of Irgarol 1051 in coastal waters of the Northeastern Caribbean (Puerto Rico (PR) and the US Virgin Islands (USVI)). L…	0	0	1	1	Caribbean	NA	Carbery-2006-Contamination of Caribbean coasta.pdf	5	North America	USA	UK	UK	USA	UK
54	Alcolado	2001	163	Caribbean Coastal Marine Productivity Programme_COMPL1.pdf	THE CARIBBEAN COASTAL MARINE PRODUCTIVITY PROGRAM (CARICOMP)	NA	CARICOMP is a regional scientific program to study land-sea interaction processes in the Caribbean coastal zone. It has been collecting data since 1992, when a Data Management Centre was established at the University of the West Indies in Jamaica. Initially it focuses on documenting the structure and productivity of major coastal communities (mangrove forests, seagrass meadows and coral reefs) at…	0	0	1	1	Caribbean	NA	Caribbean Coastal Marine Productivity Programme_COMPL1.pdf	24	Caribbean	Cuba	Trinidad & Tobago	Trinidad & Tobago	Venezuela	Netherlands Antilles	Netherlands Antilles	Netherlands Antilles	Puerto Rico	Colombia	Jamaica	Bahamas	Dominican Republic	Mexico	USA	Venezuela	USA	Trinidad & Tobago	Jamaica	USA	Barbados	Barbados	Venezuela	Netherlands Antilles
221	Carr	2009	164	carr_2009_jamaica_bound.pdf	Jamaica bound? Marine resources and magement at a crossroads in Antigua and Barbuda	Jamaica bound? Marine resources and management at a crossroads in Antigua and Barbuda	Antigua and Barbuda is rapidly developing a tourism industry built around a marketed perception of a healthy marine and coastal environment. Yet economic indicators suggest that Antigua and Barbuda is overexploiting its marine resources, particularly its fish and coral reef communities. Although its marine resources remain relatively healthy, Antigua and Barbuda will jeopardise the ecological bas…	0	1	0	1	Caribbean	NA	carr_2009_jamaica_bound.pdf	2	North America	USA	USA
222	Carreiro-Silva	2012	165	Carreiro-Silva-2012-Macrobioerosion of dead br.pdf	Macrobioerosion of dead branching Porites ,4 and 6 years after coral mass mortality	Macrobioerosion of dead branching Porites, 4 and 6 years after coral mass mortality	Internal bioerosion by macroborers (polychaetes, sipunculans, bivalves, and sponges) was investigated in dead Porites branches collected from 8 coral reefs along the Kenyan coast, 4 and 6 yr after the 1998 mass mortality of corals. Levels of nutrients, benthic cover, and numbers of grazing and invertebrate-eating fish and sea urchins were measured and evaluated for their influence on macrobioeros…	0	0	1	1	Eastern Africa	NA	Carreiro-Silva-2012-Macrobioerosion of dead br.pdf	2	Europe	Portugal	USA
16		2013	166	Carriger-2013-Advancing the GuaÌnica Bay (Puert.pdf		NA	Consideration of stakeholder values in watershed planning and management is a necessity, but sufficiently eliciting, understanding, and organizing those values can be daunting. Many studies have demonstrated the usefulness of formal decision analysis to integrate expert knowledge with stakeholder values. Here, some decision analysis structuring tools were used to advance a proposed watershed mana…	0	1	0	1	Non-specific	NA	Carriger-2013-Advancing the Gua?nica Bay (Puert.pdf	4	North America	USA	USA	USA	USA
227	Cartier	2014	167	Cartier-2014-The influence of pearl oyster far.pdf	The influence of pearl oyster farming on reef fish abundance and diversity in Ahe, French Pacific Islands	The influence of pearl oyster farming on reef fish abundance and diversity in Ahe, French Polynesia	Many cultured pearl farms are located in areas of the Pacific that have thriving, highly diverse fish communities but the impacts of farming on these communities are poorly understood. We studied the effects of pearl oyster farming on shore fish abundance and diversity in the lagoon of Ahe, French Polynesia by adapting roving diver census methods to the coral reef bommies of the lagoon and compar…	0	0	1	1	Pacific Islands	NA	Cartier-2014-The influence of pearl oyster far.pdf	2	Europe	Switzerland	USA
18		2013	168	Carvalho-2013-ReefBahia, an integrated GIS app.pdf		NA	Coral reefs around the world are facing serious threats. These fragile ecosystems are in need for conservation. The coastal state of Bahia hosts the most extensive and richest area of coral reefs in the South Atlantic Ocean. Assessment, planning and management of coral reef ecosystems are particularly challenging tasks. This work shows how the creation of a GIS improves the process of management,…	0	1	0	1	Non-specific	NA	Carvalho-2013-ReefBahia	2	South America	Brazil	Brazil
12		2011	169	Cassata-2008-Coral reef communities, habitats2.pdf		NA	As Australias longest fringing reef, Ningaloo Reef lies close to the mainland of northwest Australia in an area of high tourism potential. The establishment of sanctuary zones in and around the northern Ningaloo Marine Park has necessitated improvements in understanding of the biodiversity and distribution of habitats and substrates in the reef lagoon, its seaward barrier, and the adjacent shelf…	0	1	0	1	Non-specific	NA	Cassata-2008-Coral reef communities	2	Australia and NZ	Australia	Australia
229	CASTELLANOS-GALINDo	2011	170	Castellanos-Gal-2011-Use of local ecological k.pdf	Use of local ecological knowledge, scientists observations and grey literature to assess marine species at risk in a tropical eastern Pacific estuary	NA	1. The loss of marine biodiversity in tropical regions of the world is a major threat to human welfare. Multiple anthropogenic drivers are responsible for this situation, with complex scenarios for coastal areas in third-world countries, where economic development often competes with conservation plans. 2. The International Union for the Conservation of Nature (IUCN) Red List of Threatened Specie…	0	1	0	1	Central America	NA	Castellanos-Gal-2011-Use of local ecological k.pdf	4	South America	Colombia	Colombia	Colombia	Colombia
3		2005	171	Castillo-CaÌrden-2005-Population genetic struct.pdf		NA	Pelliciera rhizophorae is a Neotropical mangrove species whose distribution is mostly restricted to the Pacific Coast, between the Gulf of Nicoya (Costa Rica) and the Esmeraldas River (Ecuador). In the Caribbean, patches of Pelliciera have been found in Nicaragua, Panama, and Colombia. The genetic variation and the population structure of P. rhizophorae were evaluated in six zones of the Colombia…	0	1	0	1	Non-specific	NA	Castillo-Ca?rden-2005-Population genetic struct.pdf	3	South America	Colombia	Colombia	Colombia
23		2015	172	Cau et al_IJG.pdf		NA	Through a non-invasive and interdisciplinary approach, distribu - tion and size/age structure of deep dwelling populations of the precious red coral Corallium rubrum (LINNAEUS, 1758), were described in two different areas of the south Sardinia continental shelf: San Pietro Island and Capo Carbonara. Although its presence in south Sardinian waters is known, data on coral populations dwelling in de…	0	1	0	1	Non-specific	NA	Cau et al_IJG.pdf	8	Europe	Italy	Italy	Italy	Italy	Italy	Italy	Italy	Italy
1		2001	173	Cavender-Bares_2001_Limnology-and-Oceanography.pdf		NA	Microbial size spectra, including bacteria through nanophytoplankton, were measured by use of flow cytometry across the western north Atlantic Ocean and during two nutrient enrichment studies: bottle enrichments in the Sargasso Sea and an in situ iron enrichment in the equatorial Pacific (IronEx II). Spectral shapes, or the relative conformity to a function described by a power law, ranged from s…	0	1	0	1	Non-specific	NA	Cavender-Bares_2001_Limnology-and-Oceanography.pdf	3	North America	USA	USA	USA
232	Ceccarelli	2014	174	Ceccarelli-2014-Habitat partitioning and vulne.pdf	Habitat partitioning and vulnerability of sharks in the Great Barrier Reef Marine Park	Habitat partitioning and vulnerability of sharks in the Great Barrier Reef Marine Park	Sharks present a critical conservation challenge, but little is known about their spatial distribution and vulnerability, particularly in complex seascapes such as Australias Great Barrier Reef Marine Park (GBRMP). We review (1) the distribution of shark species among the primary habitats of the GBRMP (coral reefs, inshore/shelf, pelagic and deepwater habitats) (2) the relative exploitation of e…	0	1	0	1	Australia and NZ	NA	Ceccarelli-2014-Habitat partitioning and vulne.pdf	5	Australia and NZ	Australia	Australia	Australia	Australia	Australia
233	Cerutti-Pereyra	2014	175	Cerutti-Pereyra-2014-Restricted movements of j.pdf	Restricted movements of juvenile rays in the lagoon of Ningaloo Reef, Western Australia _ evidence for the existence of a nursery	Restricted movements of juvenile rays in the lagoon of Ningaloo Reef, Western Australia - evidence for the existence of a nursery	Little information is available on the movements and behaviour of tropical rays despite their potential ecological roles and economic value as a fishery and a tourism resource. A description of the movement patterns and site fidelity of juvenile rays within a coral reef environment is provided in this study. Acoustic telemetry was used to focus on the use of potential nursery areas and describe m…	0	0	1	1	Australia and NZ	NA	Cerutti-Pereyra-2014-Restricted movements of j.pdf	8	Australia and NZ	Australia	Australia	Malaysia	Australia	Australia	Australia	Australia	Australia
235	Chakalall	2007	176	Chakalall-2007-Governce of fisheries and oth.pdf	4 of fisheries and other living marine resources in the Wider Caribbean	Governance of fisheries and other living marine resources in the Wider Caribbean	Living marine resources are critical for human well-being in the Wider Caribbean region. These are mainly fisheries resources which provide food and employment for many thousands of coastal inhabitants. Other non-exploited resources such as reef corals are also important in sustaining tourism. Many of these resources are transboundary and require collaboration for effective governance. The fact t…	0	1	0	1	Caribbean	NA	Chakalall-2007-Governance of fisheries and oth.pdf	5	Caribbean	Barbados	Barbados	Barbados	Barbados	Barbados
237	Chandrajith	2014	177	Chandrajith-2014-Quantification of groundwater.pdf	Quantification of groundwater_seawater interaction in a coastal sandy aquifer system: a study from Pama, Sri Lanka	Quantification of groundwater-seawater interaction in a coastal sandy aquifer system: A study from Panama, Sri Lanka	The Panama coastal aquifer system is an important water resource in the southeast coast of Sri Lanka that provides adequate supplies of water for agriculture and domestic uses. One of the biggest threats to these fragile aquifers is the sea water intrusion. In this study, recharging mechanism and geochemical evaluation of groundwater in the coastal sandy aquifer of Panama were evaluated using che…	0	0	1	1	Southwest Asia	NA	Chandrajith-2014-Quantification of groundwater.pdf	7	Southwest Asia	Sri Lanka	Sri Lanka	Sri Lanka	Germany	Germany	Sri Lanka	Sri Lanka
238	Chang	2008	178	Chang-2008-A system dymic based DSS for sust.pdf	A system dymic based DSS for sustaible coral reef magement in Kenting coastal zone, Taiwan	A system dynamic based DSS for sustainable coral reef management in Kenting coastal zone, Taiwan	Kenting is located at the southern end of Taiwan, and is famous for its abundant marine resources, especially diverse coral species. This beautiful coastal zone attracts millions of tourists every year. However, growing human activities and increasing land reclamation pressure have resulted in negative impact to the coral reef ecosystem. Thus, exploring an integrated approach for sustainable cora…	0	1	0	1	East Asia	NA	Chang-2008-A system dynamic based DSS for sust.pdf	3	East Asia	Taiwan	Taiwan	Taiwan
248	CHIN	2010	179	Chin-2010-An integrated risk assessment for cl.pdf	An integrated risk assessment for climate change: alysing the vulnerability of sharks and rays on Australias Great Barrier Reef	NA	An Integrated Risk Assessment for Climate Change (IRACC) is developed and applied to assess the vulnerability of sharks and rays on Australias Great Barrier Reef (GBR) to climate change. The IRACC merges a traditional climate change vulnerability framework with approaches from fisheries ecological risk assessments. This semi-quantitative assessment accommodates uncertainty and can be applied at …	0	1	0	1	Australia and NZ	NA	Chin-2010-An integrated risk assessment for cl.pdf	4	Australia and NZ	Australia	Australia	Australia	Australia
249	CHIN	2012	180	Chin-2012-Reef sharks and inshore habitats_ Pa.pdf	Reef sharks and inshore habitats: patterns of occurrence and implications for vulnerability	NA	Reef sharks play important roles in tropical reef environments, but population declines have occurred in various locations including the Great Barrier Reef (GBR). While many reef shark studies focus on coral reefs, some reef sharks have been found across a range of inshore and coastal habitats. This study analyses fisheries observer data across large spatial scales (19 314 km2) to investigate the…	0	1	0	1	Australia and NZ	NA	Chin-2012-Reef sharks and inshore habitats_ Pa.pdf	4	Australia and NZ	Australia	Australia	Australia	Australia
251	Choi	2009	181	Choi-2009-Integrated Stochastic Environmental Risk Assessment of the Harbour Area Treatment Scheme (HATS) in Hong Kong.pdf	Integrated Stochastic Environmental Risk Assessment of the Harbour Area Treatment Scheme (HATS) in Hong Kong	Integrated stochastic environmental risk assessment of the Harbour Area Treatment Scheme (HATS) in Hong Kong	Submarine ocean outfalls are commonly used for the disposal of partially treated effluents in coastal cities. Typically, the greatest environmental risk caused by toxic substances occurs in the near field of the outfall discharge. The ecological impact of the effluent varies greatly under different discharge and environmental conditions that are characterized by both regular and stochastic variat…	0	1	0	1	East Asia	NA	Choi-2009-Integrated Stochastic Environmental Risk Assessment of the Harbour Area Treatment Scheme (HATS) in Hong Kong.pdf	4	East Asia	China	China	China	China
259	Christianen	2011	182	Christianen-2012-Marine megaherbivore grazing.pdf	Marine megaherbivore grazing may increase seagrass tolerance to high nutrient loads	NA	1. Populations of marine megaherbivores including green turtle (Chelonia mydas) have declined dramatically at a global scale as a result of overharvesting and habitat loss. This decline can be expected to also affect the tolerance of seagrass systems to coastal eutrophication. Until now, however, simultaneous effects of topdown control by megaherbivore grazing and bottomup control by nutrient i…	0	0	1	1	Southeast Asia	NA	Christianen-2012-Marine megaherbivore grazing.pdf	6	Europe	Netherlands	Netherlands	Netherlands	Indonesia	Netherlands	Netherlands
260	Christie	2005	183	Christie-2005-Observed and perceived environme.pdf	Observed and perceived environmental impacts of marine protected areas in two Southeast Asia sites	Observed and perceived environmental impacts of marine protected areas in two Southeast Asia sites	Integrated coastal management (ICM) commonly utilizes marine protected areas (MPAs) as a management tool. The study demonstrates that MPAs, embedded within an ICM framework, have had positive impacts on coral reefs in Mabini, the Philippines and within tourism-reserved zones of the Bunaken National Park (BNP), Indonesia. ICM has not been able to stem all coral reef degradation, particularly in co…	1	0	0	1	Southeast Asia	NA	Christie-2005-Observed and perceived environme.pdf	1	North America	USA
265	Cinner	2013	184	Cinner_etal_2013.pdf	Evaluating Social and Ecological Vulnerability of Coral Reef Fisheries to Climate Change	Evaluating social and ecological vulnerability of coral reef fisheries to climate change.	There is an increasing need to evaluate the links between the social and ecological dimensions of human vulnerability to climate change. We use an empirical case study of 12 coastal communities and associated coral reefs in Kenya to assess and compare five key ecological and social components of the vulnerability of coastal social-ecological systems to temperature induced coral mortality [specifi…	0	0	1	1	Eastern Africa	NA	Cinner_etal_2013.pdf	8	Australia and NZ	Australia	Australia	Canada	South Africa	Australia	Australia	Australia	USA
261	Cinner	2007	185	Cinner-2007-Socioeconomic thresholds that affe.pdf	Socioeconomic Thresholds That Affect Use of Customary Fisheries 5 Tools	Socioeconomic thresholds that affect use of customary fisheries management tools	Customary forms of resource management, such as taboos, have received considerable attention as a potential basis for conservation initiatives in the Indo-Pacific. Yet little is known about how socioeconomic factors influence the ability of communities to use customary management practices and whether socioeconomic transformations within communities will weaken conservation initiatives with a cus…	0	0	1	1	Pacific Islands	NA	Cinner-2007-Socioeconomic thresholds that affe.pdf	3	Australia and NZ	Australia	Australia	Hong Kong
263	Cinner	2010	186	Cinner-2010-Livelihood diversification in trop.pdf	Livelihood Diversification in Tropical Coastal Communities: A Network-Based Approach to Alyzing 'Livelihood Landscapes'	Livelihood diversification in tropical coastal communities: A network-based approach to analyzing 'livelihood landscapes'	Background: Diverse livelihood portfolios are frequently viewed as a critical component of household economies in developing countries. Within the context of natural resources governance in particular, the capacity of individual households to engage in multiple occupations has been shown to influence important issues such as whether fishers would exit a declining fishery, how people react to poli…	0	0	1	1	Eastern Africa	NA	Cinner-2010-Livelihood diversification in trop.pdf	2	Australia and NZ	Australia	Sweden
264	Cinner	2012	187	Cinner-2012-Vulnerability of coastal communiti.pdf	Vulnerability of coastal communities to key impacts of climate change on coral reef fisheries	Vulnerability of coastal communities to key impacts of climate change on coral reef fisheries	Coral reefs support the livelihood of millions of people especially those engaged in marine fisheries activities. Coral reefs are highly vulnerable to climate change induced stresses that have led to substantial coral mortality over large spatial scales. Such climate change impacts have the potential to lead to declines in marine fish production and compromise the livelihoods of fisheries depende…	0	0	1	1	Eastern Africa	NA	Cinner-2012-Vulnerability of coastal communiti.pdf	9	Australia and NZ	Australia	USA	Australia	UK	Kenya	UK	Kenya	UK	Sweden
266	Cinner	2014	188	Cinner-2014-Winners and Losers in Marine Conse.pdf	Winners and Losers in Marine Conservation: Fishers' Displacement and Livelihood Benefits from Marine Reserves	Winners and Losers in Marine Conservation: Fishers' Displacement and Livelihood Benefits from Marine Reserves	Marine reserves can create both benefits and costs to fishers. This article explores the perceptions of fishers in Kenya and Seychelles about displacement, spillover, and overall impacts of local marine reserves on their livelihoods. We test whether these perceptions are different among fishers from different geographic and socioeconomic conditions. Sixty-six percent of fishers had been displaced…	0	0	1	1	Eastern Africa	NA	Cinner-2014-Winners and Losers in Marine Conse.pdf	7	Australia and NZ	Australia	UK	Australia	Kenya	Sweden	Seychelles	Kenya
267	Cinner	2015	189	Cinner-2015-A sea change on the African coast_.pdf	A sea change on the African coast? Prelimiry social and ecological outcomes of a governce transformation in Kenyan fisheries	A sea change on the African coast? Preliminary social and ecological outcomes of a governance transformation in Kenyan fisheries	We examined social and ecological outcomes over a period of transformational change in the governance of Kenyan fisheries. Devolving decision-making power to local communities initially promoted a perception of winners and losers among resource users, but after just 6 years, there were virtually no resource users who felt that the new governance arrangement was detrimental to their livelihood. Th…	0	0	1	1	Eastern Africa	NA	Cinner-2015-A sea change on the African coast_.pdf	2	Australia and NZ	Australia	USA
22		2014	190	CisseÌ-2014-Sustaibility of tropical small-sc.pdf		NA	Like many tropical small-scale fisheries, the French Guiana coastal fishery is characterized by the high fish biodiversity of its ecosystem, the weak selectivity of the fleets exploiting the resources, and the heterogeneity of the vessels in terms of size and fishing techniques. The Rapfish method is used to assess sustainability within 11 fishery systems by means of 27 attributes relating to eco…	0	1	0	1	Non-specific	NA	Cisse?-2014-Sustainability of tropical small-sc.pdf	3	Europe	France	France	France
24		2015	191	Cleaver_Konnig_2015.pdf		NA	This special issue furthers the study of natural resource management from a critical institutional perspective. Critical institutionalism (CI) is a contemporary body of thought that explores how institutions dynamically mediate relationships between people, natural resources and society. It focuses on the complexity of institutions entwined in everyday social life, their historical formation, the…	0	0	1	1	Non-specific	NA	Cleaver_Konnig_2015.pdf	2	Europe	UK	Netherlands
860	Mir	2013	192	climate chane paper.pdf	Climate Change and Coastal Zone of Bangladesh: Vulnerability, Resilience and Adaptability	NA	The coastal region of Bangladesh covers about 20% of total land area and over 30% of the cultivable lands of the country. It includes highly diverse ecosystems e.g. the worlds largest single tract of mangroves (the Sundarbans), beaches, coral reefs, dunes and wetlands. With its dynamic natural environments, provides a range of goods and services to the peoples of Bangladesh. It is agreed and doc…	0	1	0	1	Southwest Asia	NA	climate chane paper.pdf	3	Southwest Asia	Bangladesh	Bangladesh	Bangladesh
273	Cochard	2008	193	Cochard-2008-The 2004 tsumi in Aceh and Sout.pdf	The 2004 tsumi in Aceh and Southern Thailand: A review on coastal ecosystems, wave hazards and vulnerability	The 2004 tsunami in Aceh and Southern Thailand: A review on coastal ecosystems, wave hazards and vulnerability	In December 2004, a huge tsunami in SE Asia claimed many lives and caused catastrophic damage. This event has stimulated a debate about the role played by coastal ecosystems such as mangrove forests and coral reefs in protecting low-lying coastal areas. While some observers claim that these ecosystems play an important role, others are more sceptical and fear that financial resources may be diver…	0	0	1	1	Southeast Asia	NA	Cochard-2008-The 2004 tsunami in Aceh and Sout.pdf	6	Europe	Switzerland	Thailand	Thailand	Thailand	Switzerland	Switzerland
275	Cohen	2013	194	Cohen-2013-Fishing dymics associated with pe.pdf	Fishing dymics associated with periodically harvested marine closures	Fishing dynamics associated with periodically harvested marine closures	Periodically-harvested fisheries closures are emerging as a socially acceptable and locally implemen- table way to balance concerns about conserving ecosystem function and sustaining livelihoods. Across the Indo-Pacific periodically-harvested closures are commonly employed, yet their contribution towards more sustainable fisheries remains largely untested in the social and ecological context of t…	0	1	0	1	Pacific Islands	NA	Cohen-2013-Fishing dynamics associated with pe.pdf	3	Australia and NZ	Australia	Australia	Australia
277	COHEN	2015	195	Cohen-2015-Social dimensions of local fisherie.pdf	Social dimensions of local fisheries co-magement in the Coral Triangle	NA	The challenge tomanage coastal resources within Asia- Pacifics Coral Triangle has gained global attention. Co-management is promoted as a key strategy to address this challenge. Contemporary communitybased co-management often leads to hybridization between local (customary) practices, and science-based management and conservation. However, the form of this hybrid has rarely been critically ana…	0	0	1	1	Pacific Islands	NA	Cohen-2015-Social dimensions of local fisherie.pdf	2	Pacific Islands	Solomon Islands	Australia
279	Coles	2009	196	Coles-2009-Spatial distribution of deepwater s.pdf	1 distribution of deepwater seagrass in the inter-reef lagoon of the Great Barrier Reef World Heritage Area	Spatial distribution of deepwater seagrass in the inter-reef lagoon of the Great Barrier Reef World Heritage Area	Seagrasses in waters deeper than 15 m in the Great Barrier Reef World Heritage Area (adjacent to the Queensland coast) were surveyed using a camera and dredge (towed for a period of 4 to 6 min); 1426 sites were surveyed, spanning from 10 to 25°S, and from inshore to the edge of the reef (out to 120 nautical miles from the coast). At each site seagrass presence, species, and biomass were recorded;…	0	1	0	1	Australia and NZ	NA	Coles-2009-Spatial distribution of deepwater s.pdf	5	Australia and NZ	Australia	Australia	Australia	Australia	Australia
280	Coles	2014	197	Coles-2014-The Great Barrier Reef World Herita.pdf		NA	The Great Barrier Reef World Heritage Area (GBRWHA) includes one of the world's largest areas of seagrass (35,000 km2) encompassing approximately 20% of the world's species. Mapping and monitoring programs sponsored by the Australian and Queensland Governments and Queensland Port Authorities have tracked a worrying decrease in abundance and area since 2007. This decline has almost certainly been …	0	1	0	1	Australia and NZ	NA	Coles-2014-The Great Barrier Reef World Herita.pdf	8	Australia and NZ	Australia	Australia	Australia	Australia	Australia	Australia	Australia	Australia
282	Collado-Vides	2007	198	Collado-Vides-2007-Tropical seagrass-associate.pdf	Tropical seagrass-associated macroalgae distributions and trends relative to water quality	Tropical seagrass-associated macroalgae distributions and trends relative to water quality	Tropical coastal marine ecosystems including mangroves, seagrass beds and coral reef communities are undergoing intense degradation in response to natural and human disturbances, therefore, understanding the causes and mechanisms present challenges for scientist and managers. In order to protect our marine resources, determining the effects of nutrient loads on these coastal systems has become a …	0	1	0	1	Caribbean	NA	Collado-Vides-2007-Tropical seagrass-associate.pdf	4	North America	USA	USA	USA	USA
283	Collard	2014	199	Collard-2014-Acidâbase physiology response to.pdf	Acid_base physiology response to ocean acidification of two ecologically and economically important holothuroids from contrasting habitats, Holothuria scabra and Holothuria parva	Acidbase physiology response to ocean acidification of two ecologically and economically important holothuroids from contrasting habitats, Holothuria scabra and Holothuria parva	Sea cucumbers are dominant invertebrates in several ecosystems such as coral reefs, seagrass meadows and mangroves. As bioturbators, they have an important ecological role in making available calcium carbonate and nutrients to the rest of the community. However, due to their commercial value, they face overexploitation in the natural environment. On top of that, occurring ocean acidification coul…	0	1	0	1	Eastern Africa	NA	Collard-2014-Acidbase physiology response to.pdf	4	Europe	Belgium	Belgium	Belgium	Belgium
284	Collier	2012	200	Collier-2012-Light thresholds derived from sea.pdf	Light thresholds derived from seagrass loss in the coastal zone of the northern Great Barrier Reef, Australia	Light thresholds derived from seagrass loss in the coastal zone of the northern Great Barrier Reef, Australia	There is a world-wide trend for deteriorating water quality and light levels in the coastal zone, and this has been linked to declines in seagrass abundance. Localized management of seagrass meadow health requires that water quality guidelines for meeting seagrass growth requirements are available. Tropical seagrass meadows are diverse and can be highly dynamic and we have used this dynamism to i…	0	1	0	1	Australia and NZ	NA	Collier-2012-Light thresholds derived from sea.pdf	3	Australia and NZ	Australia	Australia	Australia
285	Collin	2013	201	Collin-2013-Bridging ridge-to-reef patches_ Se.pdf	Bridging Ridge-to-Reef Patches: Seamless Classification of the Coast Using Very High Resolution Satellite	Bridging ridge-to-reef patches: Seamless classification of the coast using very high resolution satellite	The structure and functioning of coral reef coastal zones are currently coping with an increasing variety of threats, thereby altering the coastal spatial patterns at an accelerated pace. Understanding and predicting the evolution of these highly valuable coastal ecosystems require reliable and frequent mapping and monitoring of both inhabited terrestrial and marine areas at the individual tree a…	0	0	1	1	Pacific Islands	NA	Collin-2013-Bridging ridge-to-reef patches_ Se.pdf	3	East Asia	Japan	Canada	French Polynesia
286	COLLIN	2005	202	Collin2005.pdf	Ecological Monitoring and Biodiversity Surveys at the Smithsonian Tropical Research Institutes Bocas del Toro Research Station	NA	The Bocas del Toro Archipelago, site of the Smithsonian Tropical Research Institutes new Bocas Research Station, is a complex area of islands, mangrove cays, peninsulas, fringing reefs and seagrass beds on the Caribbean coast of Panama. The state-of-the-art research station runs long-term monitoring of physical and biological aspects of the local environments, that includes water and air tempera…	1	0	0	1	Central America	NA	Collin2005.pdf	1	Central America	Panama
2		2004	203	Coma_2004_Ecological-Applications.pdf		NA	The red gorgonian Paramuricea clavata is a long-lived, slow-growing sessile invertebrate of ecological and conservation importance in the northwestern Mediterranean Sea. We develop a series of size-based matrix models for two Paramuricea clavata populations. These models were used to estimate basic life history traits for this species and to evaluate the viability of the red gorgonian populations…	0	1	0	1	Non-specific	NA	Coma_2004_Ecological-Applications.pdf	5	Europe	Spain	Spain	Spain	Spain	Spain
1209	Stacey	2012	204	ConservatSoc10163-3928133_105441.pdf	Prospects for Whale Shark Conservation in Eastern Indonesia Through Bajo Traditiol Ecological 8 and Community-based Monitoring	Prospects for whale shark conservation in Eastern Indonesia through bajo traditional ecological knowledge and community-based monitoring	The whale shark, Rhincodon typus , is a long-lived migratory species inhabiting tropical and warm-temperate waters worldwide. Seasonal aggregations of whale sharks in shallow coastal waters of many countries have led to the development of ecotourism industries. Whale sharks that aggregate seasonally at Ningaloo Reef in Western Australia have a migration range within Indonesian and Southeast Asian…	0	0	1	1	Southeast Asia	NA	ConservatSoc10163-3928133_105441.pdf	5	Australia and NZ	Australia	Australia	Australia	Australia	Indonesia
526	Green	2011	205	ConservatSoc93173-3920879_105328.pdf		Emerging marine protected area networks in the coral triangle: Lessons and way forward	Marine protected areas (MPAs) and MPA networks are valuable tools for protecting coral reef habitats and managing near-shore fi sheries, while playing an essential role in the overall conservation of marine biodiversity. In addition, MPAs and their networks are often the core strategy for larger scale and more integrated forms of marine resource management that can lead to ecosystem-based managem…	0	0	1	1	Non-specific	NA	ConservatSoc93173-3920879_105328.pdf	10	Southeast Asia	Philippines	NA	USA	NA	NA	NA	NA	NA	NA	NA
527	Green	2011	205	ConservatSoc93173-3920879_105328.pdf		Spatio-temporal variability of coral recruitment on shallow reefs in St. John, US Virgin Islands	Marine protected areas (MPAs) and MPA networks are valuable tools for protecting coral reef habitats and managing near-shore fi sheries, while playing an essential role in the overall conservation of marine biodiversity. In addition, MPAs and their networks are often the core strategy for larger scale and more integrated forms of marine resource management that can lead to ecosystem-based managem…	0	0	1	1	Non-specific	NA	ConservatSoc93173-3920879_105328.pdf	10	Southeast Asia	Philippines	NA	USA	NA	NA	NA	NA	NA	NA	NA
636	JianWei	2013	206	Coral%20community%20dymics%20and%20shallow-water%20carbote%20deposition%20of%20the%20reef-flat%20around%20Yongxing%20Island%2c%20the%20Xisha%20Islands.pdf	Coral community dymics and shallow-water carbote deposition of the reef-flat around Yongxing Island, the Xisha Islands	NA	Microbes and microbial carbonates in reef-flat and coral community dynamics and submarine geomorphologic features in reef crest and fore reef of Yongxing Island, the Xisha Islands, South China Sea, were studied by means of scuba diving, underwater investigation, and line intercept transect survey. Studies indicate a very high coral mortality with few living corals in the reef flat of Yongxing Isl…	0	0	1	1	East Asia	NA	Coral%20community%20dynamics%20and%20shallow-water%20carbonate%20deposition%20of%20the%20reef-flat%20around%20Yongxing%20Island%2c%20the%20Xisha%20Islands.pdf	5	East Asia	China	China	China	USA	China
290	Cordeiro	2010	207	Cordeiro-2010-Evaluation of solid residues rem.pdf	Evaluation of solid residues removed from a mangrove swamp in the S o Vicente Estuary, SP, Brazil	Evaluation of solid residues removed from a mangrove swamp in the São Vicente Estuary, SP, Brazil	Mangrove swamps are found in estuaries along the coastal plains of tropical regions and have be subjected to heavy occupation and use pressure due to their privileged locations and abundance of biological resources. The present work evaluated the ecological characteristics and solid wastes accumulated in eight areas along the Santos  São Vicente Estuary Complex. The superficially deposited resid…	0	1	0	1	South America	NA	Cordeiro-2010-Evaluation of solid residues rem.pdf	2	South America	Brazil	Brazil
292	Cort_s	2001	208	Cortes_2001.pdf	Requiem for an eastern Pacific seagrass bed	NA	Few papers concerning seagrasses of the eastern Pacific have been published. This paper presents the first ecological data on the seagrass, Ruppia maritima, from a non-lagoonal setting in the eastern Pacific. A 5 000 m2 patch formed by R. maritima, at Playa Iguanita, Bahía Culebra, Pacific coast of Costa Rica was studied. Plant density and leaf length of R. maritima were determined along two tran…	1	0	0	1	Central America	NA	Cortes_2001.pdf	1	Central America	Costa Rica
295	Costa	2009	209	Costa-2009-Seasol differences in mercury acc.pdf	Seasol differences in mercury accumulation in Trichiurus lepturus (Cutlassfish) in relation to length and weight in a Northeast Brazilian estuary	Seasonal differences in mercury accumulation in Trichiurus lepturus (Cutlassfish) in relation to length and weight in a Northeast Brazilian estuary	Background, aim, and scope At tropical latitudes, and especially on the semi-arid coasts of the Brazilian Northeast, the rainfall regime governs the water quality of estuaries due to the pronounced difference between the rainy and dry seasons. These changes may be responsible for seasonal changes in bioavailability of mercury (Hg) and other pollutants to the estuarine and coastal biota. Mercury b…	0	1	0	1	South America	NA	Costa-2009-Seasonal differences in mercury acc.pdf	7	South America	Brazil	Brazil	Brazil	Brazil	Brazil	Brazil	Brazil
296	Costa	2014	210	Costa-2014-Biological impacts of the port comp.pdf	Biological Impacts of the Port Complex of Suape on Benthic Reef Communities (Permbuco_Brazil)	Mapping reef fish and the seascape: Using acoustics and spatial modeling to guide coastal management	The construction of Suapes port in 1979 divided a natural reef line into two reefs (Suape and Muro Alto) and generated changes in the hydrodynamics along the coast of Pernambuco State, Brazil. We compared the composition of the macrobenthic communities on the two reefs to determine how they were affected by the construction of the port. Two seasonal collections were made along each reef utilizin…	0	0	1	1	South America	NA	Costa-2014-Biological impacts of the port comp.pdf	9	South America	Brazil	Brazil	Brazil	Brazil	Brazil	Brazil	Canada	Brazil	Brazil
297	Costa	2014	210	Costa-2014-Biological impacts of the port comp.pdf	Biological Impacts of the Port Complex of Suape on Benthic Reef Communities (Permbuco_Brazil)	Biological impacts of the port complex of suape on benthic reef communities (Pernambuco-Brazil)	The construction of Suapes port in 1979 divided a natural reef line into two reefs (Suape and Muro Alto) and generated changes in the hydrodynamics along the coast of Pernambuco State, Brazil. We compared the composition of the macrobenthic communities on the two reefs to determine how they were affected by the construction of the port. Two seasonal collections were made along each reef utilizin…	0	0	1	1	South America	NA	Costa-2014-Biological impacts of the port comp.pdf	9	South America	Brazil	Brazil	Brazil	Brazil	Brazil	Brazil	Canada	Brazil	Brazil
298	Courtney	2010	211	Courtney-2002-Building Philippine Local Govern.pdf	Building Philippine Local Government Capacity for Coastal Resource 5	NA	The responsibility for managing coral reefs and other coastal resources was largely devolved to coastal municipalities and cities in the Philippines in 1991 with the passage of the Local Government Code. Devolution of powers and responsibilities to local government has paved the way for mainstreaming coastal resource management at the local level. However, the capacity to carry out this mandate h…	0	1	0	1	Southeast Asia	NA	Courtney-2002-Building Philippine Local Govern.pdf	3	Southeast Asia	Philippines	Philippines	Philippines
301	Crase	2013	212	Crase-2013-Hydroperiod is the main driver of t.pdf	Hydroperiod is the main driver of the spatial pattern of domince in mangrove communities	Hydroperiod is the main driver of the spatial pattern of dominance in mangrove communities	Aim Many mangrove communities form bands parallel to the shoreline with each community dominated by a single species. However, the key determinants of mangrove species distribution across the intertidal zone are not well understood. We aimed to quantify the relationship between species dominance and the hydroperiod (defined as the duration of inundation in a year), soil salinity and the salinity…	0	1	0	1	Australia and NZ	NA	Crase-2013-Hydroperiod is the main driver of t.pdf	5	Australia and NZ	Australia	Australia	Australia	Australia	Australia
302	CRAWFORD	2010	213	Crawford-2004-Compliance and enforcement of co.pdf	Compliance and Enforcement of Community-Based Coastal Resource 5 Regulations in North Sulawesi, Indonesia	NA	Community-based coastal resources management has become a popular approach to marine conservation and sustainable fisheries management in the Asia-Pacific region. One premise of this approach is that enforcement of community management initiatives is the primary responsibility of the community and that, in most instances, they have the capability to effectively enforce locally developed regulatio…	0	0	1	1	Southeast Asia	NA	Crawford-2004-Compliance and enforcement of co.pdf	4	North America	USA	Indonesia	Indonesia	Indonesia
305	Cribb	2012	214	Cribb-2012-Site fidelity and behaviour of spin.pdf	Site fidelity and behaviour of spinner dolphins (Stenella longirostris) in Moon Reef, Fiji Islands: implications for conservation	Site fidelity and behaviour of spinner dolphins (Stenella longirostris) in Moon Reef, Fiji Islands: Implications for conservation	Spinner dolphins (Stenella longirostris) were observed to frequent a tropical reef complex off the coast of Fiji on a regular basis. Boats from surrounding tourist destinations visit this reef on a nearly daily basis to observe the dolphins and partake in various tourist activities, such as snorkelling. The aim of the study was to determine whether this reef is a resting habitat for this populati…	0	1	0	1	Pacific Islands	NA	Cribb-2012-Site fidelity and behaviour of spin.pdf	3	Australia and NZ	Australia	Australia	Australia
309	Cruz-Trinidad	2009	215	Cruz-Trinidad-2009-Development trajectories an.pdf	Development trajectories and impacts on coral reef use in Lingayen Gulf, Philippines	Development trajectories and impacts on coral reef use in Lingayen Gulf, Philippines	Management interventions to reduce pressures on coral reefs often include attracting fishers to nonextractive non-fishery supplemental livelihoods. We look at the case of coral reefs in Lingayen Gulf, Philippines to understand the impacts of local (i.e., aquaculture and tourism), regional, and national development on the artisanal fisheries sector. Using household surveys and a coral reef interac…	0	1	0	1	Southeast Asia	NA	Cruz-Trinidad-2009-Development trajectories an.pdf	3	Southeast Asia	Philippines	Philippines	Philippines
312	Cull	2014	216	Cull-2015-Consequences of experimental cortiso.pdf	Consequencesofexperimentalcortisolmanipulationsonthethermal biology ofthecheckeredpuffer(Sphoeroidestestudineus) inlaboratory and field environments	NA	Anthropogenic climate change is altering temperature regimes for coastal marine fishes. However, given that temperature changes will not occur in isolation of other stressors, it is necessary to explore the potential consequences of stress on the thermal tolerances and preferences of tropical marine fish in order to understand the thresholds for survival, and predict the associated coastal ecolog…	0	0	1	1	Caribbean	NA	Cull-2015-Consequences of experimental cortiso.pdf	7	North America	Canada	USA	USA	USA	Canada	Bahamas	Canada
315	Cvitanovic	2013	217	Cvitanovic-2013-Critical research needs for ma.pdf	Critical research needs for maging coral reef marine protected areas: Perspectives of academics and magers	Critical research needs for managing coral reef marine protected areas: Perspectives of academics and managers	Marine protected areas (MPAs) are a primary policy instrument for managing and protecting coral reefs. Successful MPAs ultimately depend on knowledge-based decision making, where scientific research is integrated into management actions. Fourteen coral reef MPA managers and sixteen academics from eleven research, state and federal government institutions each outlined at least five pertinent rese…	0	1	0	1	Non-specific	NA	Cvitanovic-2013-Critical research needs for ma.pdf	23	Australia and NZ	Australia	Australia	Australia	Australia	Australia	Australia	Australia	Australia	Australia	Australia	Australia	Australia	Australia	Australia	Australia	Australia	Australia	Australia	Australia	Australia	Australia	Australia	Australia
316	Cyrok	2014	218	Cyrok-2014-Drivers of pCO2 variability in tw.pdf	Drivers of pCO2 variability in two contrasting coral reef lagoons: The influence of submarine groundwater discharge	NA	The impact of groundwater on pCO2 variability was assessed in two coral reef lagoons with distinct drivers of submarine groundwater discharge (SGD). Diel variability of pCO2 in the two ecosystems was explained by a combination of biological drivers and SGD inputs. In Rarotonga, a South Pacific volcanic island, 222Rn-derived SGD was driven primarily by a steep terrestrial hydraulic gradient, and t…	0	1	0	1	Pacific Islands	NA	Cyronak-2014-Drivers of pCO2 variability in tw.pdf	5	Australia and NZ	Australia	Australia	Australia	Australia	Australia
319	Daby	2006	219	Daby-2006-Current patterns and the distributio.pdf	Current patterns and the distribution of benthic habitats in a coastal lagoon of Mauritius	Current patterns and the distribution of benthic habitats in a coastal lagoon of Mauritius	The oceanography around Mauritius (in the Western Indian Ocean) remains largely unstudied, hence there is an acute scarcity of marine environmental data for management purposes. Rigorous water depth and current measurements were made on a system of grids inside Le Morne lagoon (in the south western part of Mauritius) inMarchApril 2000 to generate semi-quantitative models of general flow pattern …	1	0	0	1	Eastern Africa	NA	Daby-2006-Current patterns and the distributio.pdf	1	East Africa	Mauritius
320	Dale	2013	220	Dale-2013-A method for risk alysis across go.pdf	A method for risk alysis across governce systems: a Great Barrier Reef case study	A method for risk analysis across governance systems: A Great Barrier Reef case study	Healthy governance systems are key to delivering sound environmental management outcomes from global to local scales. There are, however, surprisingly few risk assessment methods that can pinpoint those domains and sub-domains within governance systems that are most likely to influence good environmental outcomes at any particular scale, or those if absent or dysfunctional, most likely to prevent…	0	1	0	1	Australia and NZ	NA	Dale-2013-A method for risk analysis across go.pdf	6	Australia and NZ	Australia	Australia	Australia	Australia	Australia	Australia
323	Dalzell	1998	221	Dalzell-1998-The role of archaeological and cu.pdf	The role of archaeological and cultural-historical records in long-range coastal _sheries resources magement strategies and policies in the Paci_c Islands	The role of archaeological and cultural-historical records in long-range coastal fisheries resources management strategies and policies in the Pacific Islands	The usefulness of conventional ?sheries science for long-term ?sheries management and policies in the resource-poor islands of the Paci?c is very limited. Fishery managers can, however, make use of such alternative sources of information as archaeological and historical data to develop ?shery management initiatives. Most Paci?c Islands were settled by humans over the last three millennia, althoug…	1	0	0	1	Pacific Islands	NA	Dalzell-1998-The role of archaeological and cu.pdf	1	Pacific Islands	New Caledonia
317	D A M B A C H E R	2007	222	Dambacher_2007_Environmental-Science-and-Techn.pdf	Qualitative Modelling of Gold Mine Impacts on Lihir Islands Socioeconomic System and Reef-Edge Fish Community	NA	Inhabitants of Lihir Island, Papua New Guinea, have traditionally relied on reef fishing and rotational farming of slash-burn forest plots for a subsistence diet. However, a new gold mine has introduced a cash economy to the islands socioeconomic system and impacted the fringing coral reef through sedimentation from the near-shore dumping of mine wastes. Studies of the Lihirian people have docum…	0	1	0	1	Pacific Islands	NA	Dambacher_2007_Environmental-Science-and-Techn.pdf	5	Australia and NZ	Australia	Australia	Australia	Australia	Australia
326	Dankwa	2004	223	Dankwa-2004-Fisheries of two tropical lagoons.pdf	Fisheries of two tropical lagoons in Gha, West Africa	Fisheries of two tropical lagoons in Ghana, West Africa	The fisheries of two coastal lagoons, Keta and Songor, were studied as part of Ghana Coastal Wetlands Management Project (GCWMP) aimed at sustainable exploitation of wetland resources. Fish samples were obtained with seine nets and cast net as well as from local fishermen. Water quality parameters (pH, dissolved oxygen, temperature and turbidity) were similar in the two lagoons, except for salini…	0	0	1	1	Western Africa	NA	Dankwa-2004-Fisheries of two tropical lagoons.pdf	5	West Africa	Ghana	USA	USA	Ghana	Ghana
327	Darling	2014	224	Darling-2014-Assessing the effect of marine re.pdf	Assessing the Effect of Marine Reserves on Household Food Security in Kenyan Coral Reef Fishing Communities	Assessing the effect of marine reserves on household food security in Kenyan coral reef fishing communities	Measuring the success or failure of natural resource management is a key challenge to evaluate the impact of conservation for ecological, economic and social outcomes. Marine reserves are a popular tool for managing coastal ecosystems and resources yet surprisingly few studies have quantified the socialeconomic impacts of marine reserves on food security despite the critical importance of this ou…	1	0	0	1	Eastern Africa	NA	Darling-2014-Assessing the effect of marine re.pdf	1	East Africa	Kenya
330	Daskalov	2003	225	Daskalov-2003-Relating sardine Sardinops sagax.pdf	Relating sardine Sardinops sagax abundance to environmental indices in northern Benguela	NA	Most attempts to define relationships between the environment and Sardinops sagax recruitment success in the northern Benguela have focused on regional indices. This study used a large-scale perspective and proposed two new indices: one based on the sea surface temperature in the tropical Atlantic, and the other on coastal wind stress. The proposed indices were not only consistent with empirical …	0	1	0	1	Middle Africa	NA	Daskalov-2003-Relating sardine Sardinops sagax.pdf	3	East Africa	Namibia	Namibia	Namibia
332	David	2010	226	David-2010-Integrated coastal zone magement.pdf	Integrated coastal zone magement perspectives to ensure the sustaibility of coral reefs in New Caledonia	Integrated coastal zone management perspectives to ensure the sustainability of coral reefs in New Caledonia	Based on a pluridisciplinary research programme on New Caledonias lagoon (20042008), this paper addresses economic, ecological and political issues in order to implement integrated coastal zone management (ICZM) in this French Pacific territory. The nickel mining industry constitutes the core of the re-balancing economic and social strategy between the Northern and Southern provinces. But major…	0	0	1	1	Pacific Islands	NA	David-2010-Integrated coastal zone management.pdf	6	Europe	France	New Caledonia	New Caledonia	France	New Caledonia	France
333	Day	2008	227	Day-2008-The need and practice of monitoring.pdf	The need and practice of monitoring, evaluating and adapting marine planning and magement  lessons from the Great Barrier Reef	The need and practice of monitoring, evaluating and adapting marine planning and management-lessons from the Great Barrier Reef	An increasing number of scientists and resource managers recognise that successful marine management approaches, including marine spatial planning (MSP), cannot occur without effective monitoring, evaluation and adaptation. These basic components are necessary to ensure that any marine planning or marine management measures are both effective and efficient. While a number of fundamental principle…	1	0	0	1	Australia and NZ	NA	Day-2008-The need and practice of monitoring.pdf	1	Australia and NZ	Australia
334	Day	2013	228	Day-2013-Effective governce of a large and c.pdf	Effective governce of a large and complex cross-jurisdictiol marine protected area: Australias Great Barrier Reef	Effective governance of a large and complex cross-jurisdictional marine protected area: Australia's Great Barrier Reef	Australias Great Barrier Reef is the largest coral reef ecosystem on earth. The governance of such a large and iconic area is complex due to the overlapping federal and state (Queensland) jurisdictions. Since 1975 this globally significant area has been protected by pioneering federal legislation which enabled the reasonable use of natural resources to co-exist with conservation	0	1	0	1	Australia and NZ	NA	Day-2013-Effective governance of a large and c.pdf	2	Australia and NZ	Australia	Australia
339	DE LA TORRE-CASTRO	2012	229	de la Torre-Cas-2012-Governce for Sustaibi.pdf	4 for Sustaibility: Insights from Marine Resource Use in a Tropical Setting in the Western Indian Ocean	NA	The last decade has seen a shift in the Natural Resource Management discourse, a shift from management to governance. Governance is held forward as a prime solution to problems associated with the sustainability of natural resources, including fisheries and other marine resources. Several countries in the Western Indian Ocean are framing governance solutions as a response to coastal/marine resour…	1	0	0	1	Eastern Africa	NA	de la Torre-Cas-2012-Governance for Sustainabi.pdf	1	Europe	Sweden
335	De ath	2010	230	DeÌath-2010-Water quality as a regiol driver.pdf	Water quality as a regiol driver of coral biodiversity and macroalgae on the Great Barrier Reef	NA	Degradation of inshore coral reefs due to poor water quality is a major issue, yet it has proved difficult to demonstrate this linkage at other than local scales. This study modeled the relationships between large-scale data on water clarity and chlorophyll and four measures of reef status along the whole Great Barrier Reef, Australia (GBR; 12248 S). Four biotic groups with different trophic req…	0	1	0	1	Australia and NZ	NA	De?ath-2010-Water quality as a regional driver.pdf	2	Australia and NZ	Australia	Australia
346	DeGeorges	2010	231	DeGeorges-2010-Land-sourced pollution with an.pdf	Land-Sourced Pollution with an Emphasis on Domestic Sewage: Lessons from the Caribbean and Implications for Coastal Development on Indian Ocean and Pacific Coral Reefs	Land-sourced pollution with an emphasis on domestic sewage: Lessons from the caribbean and implications for coastal development on indian ocean and pacific coral reefs	This paper discusses land-sourced pollution with an emphasis on domestic sewage in the Caribbean in relation to similar issues in the Indian Ocean and Pacific. Starting on a large-scale in the 1980s, tropical Atlantic coastlines of Florida and Caribbean islands were over-developed to the point that traditional sewage treatment and disposal were inadequate to protect fragile coral reefs from eutro…	0	0	1	1	Southwest Asia	NA	DeGeorges-2010-Land-sourced pollution with an.pdf	3	North America	USA	USA	South Africa
350	DeMartini	2013	232	DeMartini-2013-Persistent spatial patterns of.pdf	Persistent spatial patterns of recruitment in a guild of Hawaiian coral reef fishes	Persistent spatial patterns of recruitment in a guild of Hawaiian coral reef fishes	We herein describe a long-term (22 consecutive yr, 1990 to 2011) time series of recruitment surveys for a guild of coral-sheltering fishes at 7 to 12 sites along a 26 km section of the west coast of Hawaii Island. For arc-eye hawkfish, the numerically dominant species, recruitment (defined as the contribution of young-of-year to the benthic population within several months after settlement from t…	0	1	0	1	Hawaii	NA	DeMartini-2013-Persistent spatial patterns of.pdf	3	North America	USA	USA	USA
351	Devlin	2005	233	Devlin-2005-Terrestrial discharge into the Gre.pdf	Terrestrial discharge into the Great Barrier Reef Lagoon: nutrient behavior in coastal waters	NA	Pollution of coastal regions of the Great Barrier Reef World Heritage Area (GBRWHA) is dominated by river discharge associated with agricultural development of the adjacent catchments. Runoff of sediment, nutrients and pesticides has sharply increased since European settlement. Since 1991 plumes from river discharge entering the GBRWHA have been mapped by aerial mapping of plume edges and concent…	0	0	1	1	Australia and NZ	NA	Devlin-2005-Terrestrial discharge into the Gre.pdf	2	Europe	UK	Australia
352	Devlin	2012	234	Devlin-2012-Catchment-to-reef continuum_ Case.pdf	Catchment-to-reef continuum: Case studies from the Great Barrier Reef	Catchment-to-reef continuum: Case studies from the Great Barrier Reef. A special issue - Marine Pollution Bulletin 2012	This Special Issue of the Marine Pollution Bulletin aims to present an overview of current science addressing the inter-connectivity between the water quality and ecological condition of the coastal and inshore areas of the Great Barrier Reef (GBR) and the land-use and processes on the adjacent catchment. This is the third Special Issue in the Marine Pollution Bulletin on this topic (Hutchings an…	0	1	0	1	Australia and NZ	NA	Devlin-2012-Catchment-to-reef continuum_ Case.pdf	2	Australia and NZ	Australia	Australia
356	Diaz-Ferguson	2010	235	Diaz-Ferguson-2010-Population genetics of a tr.pdf	Population Genetics of a Trochid Gastropod Broadens Picture of Caribbean Sea Connectivity	NA	Background: Regional genetic connectivity models are critical for successful conservation and management of marine species. Even though rocky shore invertebrates have been used as model systems to understand genetic structure in some marine environments, our understanding of connectivity in Caribbean communities is based overwhelmingly on studies of tropical fishes and corals. In this study, we i…	0	1	0	1	Caribbean	NA	Diaz-Ferguson-2010-Population genetics of a tr.pdf	3	North America	USA	USA	USA
359	Diedrich	2007	236	Diedrich-2007-The impacts of tourism on coral.pdf	The impacts of tourism on coral reef conservation awareness and support in coastal communities in Belize	The impacts of tourism on coral reef conservation awareness and support in coastal communities in Belize	Marine recreational tourism is one of a number of threats to the Belize Barrier Reef but, conversely, represents both a motivation and source of resources for its conservation. The growth of tourism in Belize has resulted in the fact that many coastal communities are in varying stages of a socio-economic shift from dependence on W shing to dependence on tourism. In a nation becoming increasingly …	1	0	0	1	Central America	NA	Diedrich-2007-The impacts of tourism on coral.pdf	1	North America	USA
363	Dirhamsyah	2005	237	Dirhamsyah-2006-Indonesian legislative framewo.pdf	Indonesian legislative framework for coastal resources magement: A critical review and recommendation	NA	This paper addresses development and problems of the legislative framework for coastal and coral reef resources management in Indonesia. It describes the background to the legal framework of Indonesian coastal and coral reef legislation and proposes an appropriate legal framework for addressing Indonesian coastal and coral reef management. This paper outlines several major challenges faced by the…	1	0	0	1	Southeast Asia	NA	Dirhamsyah-2006-Indonesian legislative framewo.pdf	1	Southeast Asia	Indonesia
364	Dixson	2011	238	Dixson-2011-Terrestrial chemical cues help cor.pdf	Terrestrial chemical cues help coral reef fish larvae locate settlement habitat surrounding islands	Terrestrial chemical cues help coral reef fish larvae locate settlement habitat surrounding islands	Understanding the degree of connectivity between coastal and island landscapes and nearby coral reefs is vital to the integrated management of terrestrial and marine environments in the tropics. Coral reef fish are capable of navigating appropriate settlement habitats following their pelagic larval phase, but the mechanisms by which they do this are unclear. The importance of olfactory cues in se…	0	0	1	1	Pacific Islands	NA	Dixson-2011-Terrestrial chemical cues help cor.pdf	7	Australia and NZ	Australia	Australia	Australia	Australia	Australia	France	USA
367	Dodge	2008	239	Dodge-2008-A call to action for coral reefs.pdf	A Call to Action for Coral Reefs	A call to action for coral reefs	IN ASSOCIATION WITH THE NATIONAL CAUCUS of Basic Biomedical Science Chairs, we have tracked funding of R01 grants (13). We found an R01 decline, which slows progress in fundamental research and deters bright young people from entering science. In 2006, we reported (3) that between fiscal years (FY) 1999 and 2005, there was a sharp decline in the funding of unamended (i.e., as originally submitte…	0	1	0	1	Non-specific	NA	Dodge-2008-A call to action for coral reefs.pdf	2	North America	USA	USA
368	Doiron	2014	240	Doiron-2014-Sustaible dive tourism_ Social a.pdf	Sustaible dive tourism: Social and environmental impacts  The case of Roatan, Honduras	Sustainable dive tourism: Social and environmental impacts - The case of Roatan, Honduras	The rapidly expanding coral diving tourism and the associated residential and commercial development exert a considerable pressure on the ecological and social fabric of Roatan, Honduras, and in particular on coral reefs and on mangroves. Due to its strong reliance on healthy and attractive coral reefs, the tourism sector on Roatan is particularly vulnerable to the impacts of climate change. This…	0	1	0	1	Central America	NA	Doiron-2014-Sustainable dive tourism_ Social a.pdf	2	North America	Canada	Canada
371	Donner	2014	241	Donner-2014-Obstacles to climate change adapta.pdf	Obstacles to climate change adaptation decisions: a case study of sea-level rise and coastal protection measures in Kiribati	Obstacles to climate change adaptation decisions: A case study of sea-level rise and coastal protection measures in Kiribati	International aid is increasingly focused on adaptation to climate change. At recent meetings of the parties to the United Nations Framework Convention on Climate Change, the developed world agreed to rapidly increase international assistance to help the developing world respond to the impacts of climate change. In this paper, we examine the decision-making challenges facing internationally suppo…	0	1	0	1	Pacific Islands	NA	Donner-2014-Obstacles to climate change adapta.pdf	2	North America	Canada	Canada
372	Donohue	2003	242	Donohue-2003-How multiagency partnerships can.pdf	How multiagency partnerships can successfully address large-scale pollution problems: a Hawaii case study	NA	Oceanic circulation patterns deposit significant amounts of marine pollution, including derelict fishing gear from North Pacific Ocean fisheries, in the Hawaiian Archipelago [Mar. Pollut. Bull. 42(12) (2001) 1301]. Management responsibility for these islands and their associated natural resources is shared by several government authorities. Non-governmental organizations (NGOs) and private indust…	1	0	0	1	Hawaii	NA	Donohue-2003-How multiagency partnerships can.pdf	1	North America	USA
375	Downs	2011	243	Downs-2011-A survey of environmental pollutant.pdf	A survey of environmental pollutants and cellular-stress markers of Porites astreoides at six sites in St. John, U.S. Virgin Islands	A survey of environmental pollutants and cellular-stress markers of Porites astreoides at six sites in St. John, U.S. Virgin Islands	Coral communities along the coast of St. John, U.S. Virgin Islands have exhibited site-specific behavior in declines. In order to determine if these specific coral communities are stressed and whether a pollutant or environmental factor present at this site is a probable stressor, we surveyed six near-shore coral communities in St. John, USVI for environmental pollutants and to determine the cell…	0	1	0	1	Caribbean	NA	Downs-2011-A survey of environmental pollutant.pdf	8	North America	USA	USA	USA	USA	UK	USA	USA	USA
379	Dung	2009	244	Dung-2009-Nha Trang Bay marine protected area.pdf	Nha Trang Bay marine protected area, Vietm: Initial trends in coral structure and some prelimiry linkages between these trends and human activities (2002 _ 2005)	Nha Trang Bay marine protected area, Vietnam: Initial trends in coral structure and some preliminary linkages between these trends and human activities (2002-2005)	Nha Trang Bay marine protected area was establishted in 2002 as a pilot initiative to enable adequate management of the reef communities, while providing opportunities for alternative income to the local community. A re-assessment of the data obtained during the baseline survey performed in 2002 and of an inventory performed in 2005 indicates a reasonable decline in hard coral structure in the ma…	1	0	0	1	Southeast Asia	NA	Dung-2009-Nha Trang Bay marine protected area.pdf	1	Southeast Asia	Vietnam
384	Edgar	2011	245	Edgar-2011-Variation in reef fish and inverteb.pdf	Variation in reef fish and invertebrate communities with level of protection from fishing across the Eastern Tropical Pacific seascape	Variation in reef fish and invertebrate communities with level of protection from fishing across the Eastern Tropical Pacific seascape	Aim To quantify general differences in reef community structure between wellenforced and poorly enforced marine protected areas (MPAs) and fished sites across the Eastern Tropical Pacific (ETP) regional seascape Location The Pacific continental margin and oceanic islands of Costa Rica, Panama, Colombia and Ecuador, including World Heritage sites at Galapagos, Coiba, Cocos and Malpelo Methods Dens…	0	0	1	1	Pacific Islands	NA	Edgar-2011-Variation in reef fish and inverteb.pdf	11	South America	Ecuador	Ecuador	Colombia	Costa Rica	Panama	Ecuador	Ecuador	Ecuador	Colombia	Ecuador	Colombia
385	Edmunds	2014	246	Edmunds-2014-The effects of storms, heavy rain.pdf	The effects of storms, heavy rain, and sedimentation on the shallow coral reefs of St. John, US Virgin Islands	The effects of storms, heavy rain, and sedimentation on the shallow coral reefs of St. John, US Virgin Islands	Disturbances are integral features of coral reefs, but since the 1970s they have degraded reefs throughout the world. While these events are well known, it is unclear how the perturbed communities will respond to further assaults. Here, we describe the effects of disturbances on reefs in St. John, US Virgin Islands, where coral cover has been\ 4.5% for decades. In early 2010, seawater temperature…	0	1	0	1	Caribbean	NA	Edmunds-2014-The effects of storms	2	North America	USA	USA
389	Ekl_f	2006	247	EkloÌf-2006-Effects of tropical open-water seaw.pdf	Effects of tropical open-water seaweed farming on seagrass ecosystem structure and function	NA	Seaweed farming is often depicted as a sustainable form of aquaculture, but suspected habitat alterations and spread of algae outside farms have rendered speculations on the actual degree of sustainability. We conducted an experimental field study on Unguja Island (Zanzibar, Tanzania) to investigate the effects of off-bottom seaweed farming on a tropical seagrass ecosystem, using 1.5 Å~ 2.5 m exp…	0	1	0	1	Eastern Africa	NA	Eklo?f-2006-Effects of tropical open-water seaw.pdf	3	Europe	Sweden	Sweden	Sweden
394	Erftemeijer	2002	248	Erftemeijer-2002-A new technique for rapid ass.pdf	A new technique for rapid assessment of mangrove degradation: a case study of shrimp farm encroachment in Thailand	NA	A new technique (Aerial Video Manta Analysis) was developed for the rapid assessment of mangrove degradation due to logging and conversion for shrimp aquaculture. Video recordings were made of mangroves along the Andaman Sea coastline, Thailand, during a 2- day aerial survey (1617 September 1997) in a small Cessna 206 aircraft at an altitude of 8001,000 feet and flying speed of 100 knots/h. The…	1	0	0	1	Southeast Asia	NA	Erftemeijer-2002-A new technique for rapid ass.pdf	1	East Africa	Tanzania
591	Hicks	2009	249	ES-2008-2712.pdf	Trade-Offs in Values Assigned to Ecological Goods and Services Associated with Different Coral Reef 5 Strategies	Trade-offs in values assigned to ecological goods and services associated with different coral reef management strategies	Societies value ecosystems and the services they provide in a number of ways. These values can help inform the management of ecosystems such as coral reefs. However, the trade-offs in ecosystem goods and services associated with different social and management conditions are poorly understood. Consequently, we examined values assigned to the goods and services identified across three types of man…	0	0	1	1	Eastern Africa	NA	ES-2008-2712.pdf	4	Europe	UK	NA	Australia	NA
262	Cinner	2009	250	ES-2009-2881.pdf	Exploring Social Resilience in Madagascars Marine Protected Areas	Exploring social resilience in Madagascar's marine protected areas	We examined and compared aspects of local-level resilience in 13 coastal communities within and adjacent to all of Madagascars national marine protected areas. Our examination of social resilience focused on indicators of the flexibility of household livelihood portfolios and both formal and informal governance institutions, the capacity of communities to organize, their capacity to learn, and a…	0	0	1	1	Eastern Africa	NA	ES-2009-2881.pdf	3	Australia and NZ	Australia	Australia	NA
11		2011	251	ES-2011-4084.pdf		NA	Adaptive governance can be conceptualized as distinct phases of: 1) understanding environmental change; 2) using this understanding to inform decision making; and 3) acting on decisions in a manner that sustains resilience of desirable system states. Using this analytical framework, we explore governance in practice in two case studies in Kenya, that reflect the messiness of contemporary coasta…	0	0	1	1	Non-specific	NA	ES-2011-4084.pdf	3	Europe	UK	UK	NA
398	Escudero	2014	252	Escudero-2014-Beach Erosion Driven by tural.pdf	Beach Erosion Driven by tural and Human Activity at Isla del Carmen Barrier Island, Mexico	Beach erosion driven by natural and human activity at Isla del Carmen Barrier Island, Mexico	The study site is located on the Gulf of Mexico and is part of the most valuable lagoon-estuarine system in Mexico, not only in ecological terms but also as an important economic and social site for the country. Although the current state of the environment is still reasonably healthy over much of its area, the natural equilibrium has been greatly affected by human activities, as in many of other…	0	1	0	1	Central America	NA	Escudero-2014-Beach Erosion Driven by Natural.pdf	3	Central America	Mexico	Mexico	Mexico
399	Espinoza	2013	253	Espinoza-2013-Diet composition and diel feedin.pdf	Diet composition and diel feeding behaviour of the banded guitarfish Zapteryxxyster along the Pacific coast of Costa Rica, Central America	Diet composition and diel feeding behaviour of the banded guitarfish Zapteryx xyster along the Pacific coast of Costa Rica, Central America	The diet and diel feeding behaviour of the banded guitarfish Zapteryx xyster were examined along the Pacific coast of Costa Rica. A sample of 235 stomachs was collected between March 2010 and December 2011 as part of an ongoing shrimp-trawl by-catch monitoring programme. Samples from multiple day and night periods allowed testing the hypothesis that Z. xyster is more active at night, thus increas…	0	1	0	1	Central America	NA	Espinoza-2013-Diet composition and diel feedin.pdf	4	Central America	Costa Rica	Costa Rica	Costa Rica	Costa Rica
402	Etile ?	2009	254	EtileÌ-2009-Spatio-temporal variations of the z.pdf	Spatio-temporal variations of the zooplankton abundance and composition in a West African tropical coastal lagoon (Grand-Lahou, Cote dIvoire)	NA	Zooplankton constitutes a sensitive tool for monitoring environmental changes in coastal lagoons; however, the available information on zooplankton communities is not sufficient to optimize their rational management. The relationships between zooplankton distribution and environmental factors were studied in a tropical lagoon to test whether the indicator properties of zooplankton assemblages cou…	0	0	1	1	Western Africa	NA	Etile?-2009-Spatio-temporal variations of the z.pdf	6	West Africa	Ivory Coast	Ivory Coast	Ivory Coast	France	Ivory Coast	Ivory Coast
405	Evans	2014	255	Evans_2014_Keeping the Great.pdf	Keeping the ¥Great in the Great Barrier Reef: large-scale governce of the Great Barrier Reef Marine Park	Keeping the Great in the Great Barrier Reef: Large-scale governance of the Great Barrier Reef Marine Park	As part of an international collaboration to compare large-scale commons, we used the Social-Ecological Systems Meta-Analysis Database (SESMAD) to systematically map out attributes of and changes in the Great Barrier Reef Marine Park (GBRMP) in Australia. We focus on eight design principles from common-pool resource (CPR) theory and other key social-ecological systems governance variables, and ex…	0	0	1	1	Australia and NZ	NA	Evans_2014_Keeping the Great.pdf	4	Europe	UK	Canada	USA	USA
404	Evans	2011	256	Evans-2011-Factors influencing adaptive marine.pdf	Factors Influencing Adaptive Marine 4 in a Developing Country Context: a Case Study of Southern Kenya	Factors influencing adaptive marine governance in a developing country context: A case study of Southern Kenya	Adaptive governance can be conceptualized as distinct phases of: 1) understanding environmental change; 2) using this understanding to inform decision making; and 3) acting on decisions in a manner that sustains resilience of desirable system states. Using this analytical framework, we explore governance in practice in two case studies in Kenya, that reflect the messiness of contemporary coasta…	0	0	1	1	Eastern Africa	NA	Evans-2011-Factors influencing adaptive marine.pdf	5	Australia and NZ	Australia	Australia	Australia	Australia	Spain
14		2013	257	Evans-2013-Future Scerios as a Research Tool.pdf		NA	Climate change is a significant future driver of change in coastal social-ecological systems. Our knowledge of impacts, adaptation options, and possible outcomes for marine environments and coastal industries is expanding, but remains limited and uncertain. Alternative scenarios are a way to explore potential futures under a range of conditions. We developed four alternative future scenarios for …	0	0	1	1	Non-specific	NA	Evans-2013-Future Scenarios as a Research Tool.pdf	5	Australia and NZ	Australia	Australia	Australia	Australia	Spain
407	Fabinyi	2008	258	Fabinyi-2008-Dive tourism, fishing and marine.pdf	Dive tourism, fishing and marine protected areas in the Calamianes Islands, Philippines	Dive tourism, fishing and marine protected areas in the Calamianes Islands, Philippines	Many conservationists and local governments in the Philippines (and other tropical countries) have attempted to link marine protected areas (MPAs) with dive tourism, arguing that the user fees generated by dive tourism can potentially generate satisfactory outcomes for all stakeholders. In this paper, an account of the relationship between MPAs, dive tourism and small-scale fisheries in the Calam…	1	0	0	1	Southeast Asia	NA	Fabinyi-2008-Dive tourism	1	Australia and NZ	Australia
408	Fabinyi	2014	259	Fabinyi-2014-Social-ecological systems, social.pdf	Social-ecological systems, social diversity, and power: insights from anthropology and political ecology	NA	A social-ecological system (SES) framework increasingly underpins the resilience paradigm. As with all models, the SES comes with particular biases. We explore these key biases. We critically examine how the SES resilience literature has attempted to define and analyze the social arena. We argue that much SES literature defines peoples interests and livelihoods as concerned primarily with the …	0	0	1	1	Non-specific	NA	Fabinyi-2014-Social-ecological systems	3	Australia and NZ	Australia	UK	Australia
409	Fabricius	2000	260	Fabricius-2000-Rapid smothering of coral reef.pdf	Rapid Smothering of Coral Reef Organisms by Muddy Marine Snow	Rapid smothering of coral reef organisms by muddy marine snow	Estuarine mud, when resuspended in nutrient-rich near-shore water, aggregates to marine snow, and within minutes to hours can exert detrimental or even lethal effects on small coral reef organisms. In a pilot study, estuarine mud was suspended in near-shore and off-shore waters of the Great Barrier Reef to a final concentration of 170 mg l 1. The short-term responses of a coral (Acropora sp.) and…	0	1	0	1	Australia and NZ	NA	Fabricius-2000-Rapid smothering of coral reef.pdf	2	Australia and NZ	Australia	Australia
410	Fabricius	2013	261	Fabricius-2013-Does Trophic Status Enhance or.pdf	Does Trophic Status Enhance of Reduce the Thermal Tolerance of Scleractinian Corals? A Review, Experiment and Conceptual Framework	Intra-annual variation in turbidity in response to terrestrial runoff on near-shore coral reefs of the Great Barrier Reef	Global warming, and nutrient and sediment runoff from coastal development, both exert increasing pressures on coastal coral reefs. The objective of this study was to resolve the question of whether coastal eutrophication may protect corals from thermal stress by improving their nutritional status, or rather diminish their thermal tolerance through the synergy of dual stressors. A review of previo…	0	1	0	1	Australia and NZ	NA	Fabricius-2013-Does Trophic Status Enhance or.pdf	4	Australia and NZ	Australia	Australia	Australia	Australia
411	Fabricius	2013	261	Fabricius-2013-Does Trophic Status Enhance or.pdf	Does Trophic Status Enhance of Reduce the Thermal Tolerance of Scleractinian Corals? A Review, Experiment and Conceptual Framework	Does Trophic Status Enhance or Reduce the Thermal Tolerance of Scleractinian Corals? A Review, Experiment and Conceptual Framework	Global warming, and nutrient and sediment runoff from coastal development, both exert increasing pressures on coastal coral reefs. The objective of this study was to resolve the question of whether coastal eutrophication may protect corals from thermal stress by improving their nutritional status, or rather diminish their thermal tolerance through the synergy of dual stressors. A review of previo…	0	1	0	1	Australia and NZ	NA	Fabricius-2013-Does Trophic Status Enhance or.pdf	4	Australia and NZ	Australia	Australia	Australia	Australia
412	Fabricius	2013	262	Fabricius-2013-Intra-annual variation in turbi.pdf	Intra-annual variation in turbidity in response to terrestrial runoff on near-shore coral reefs of the Great Barrier Reef	Intra-annual variation in turbidity in response to terrestrial runoff on near-shore coral reefs of the Great Barrier Reef	Seawater turbidity is a fundamental driver of the ecology of coastal marine systems, and is widely used as indicator for environmental reporting. However, the time scales and processes leading to changes in turbidity in tropical coastal waters remain poorly understood. This study investigates the main determinants of inshore turbidity in four inshore regions alongw1000 km of the Australian Great …	0	1	0	1	Australia and NZ	NA	Fabricius-2013-Intra-annual variation in turbi.pdf	5	Australia and NZ	Australia	Australia	Australia	Australia	Australia
413	Fabricius	2013	262	Fabricius-2013-Intra-annual variation in turbi.pdf	Intra-annual variation in turbidity in response to terrestrial runoff on near-shore coral reefs of the Great Barrier Reef	Does Trophic Status Enhance or Reduce the Thermal Tolerance of Scleractinian Corals? A Review, Experiment and Conceptual Framework	Seawater turbidity is a fundamental driver of the ecology of coastal marine systems, and is widely used as indicator for environmental reporting. However, the time scales and processes leading to changes in turbidity in tropical coastal waters remain poorly understood. This study investigates the main determinants of inshore turbidity in four inshore regions alongw1000 km of the Australian Great …	0	1	0	1	Australia and NZ	NA	Fabricius-2013-Intra-annual variation in turbi.pdf	5	Australia and NZ	Australia	Australia	Australia	Australia	Australia
416	Failler	2015	263	Failler-2015-Valuation of marine and coastal e.pdf	Valuation of marine and coastal ecosystem services as a tool for conservation: The case of Martinique in the Caribbean	Valuation of marine and coastal ecosystem services as a tool for conservation: The case of Martinique in the Caribbean	Martinique possesses 55 km2 of coral reefs, 50 km2 of sea grass and 20 km2 of mangroves. These three ecosystems produce services to a value estimated at 250 million  (M)/year (valuation recently undertaken under the French initiative for Coral Reef Conservationthe IFRECOR program). It is estimated that around 60% of this value originates from direct uses such as recreational activities (diving…	0	0	1	1	Caribbean	NA	Failler-2015-Valuation of marine and coastal e.pdf	4	Europe	UK	UK	UK	Martinique
419	Feller	2010	264	Feller-2010-Biocomplexity in mangrove ecosyste.pdf	Biocomplexity in Mangrove 4s	Biocomplexity in mangrove ecosystems	Mangroves are an ecological assemblage of trees and shrubs adapted to grow in intertidal environments along tropical coasts. Despite repeated demonstration of their economic and societal value, more than 50% of the worlds mangroves have been destroyed, 35% in the past two decades to aquaculture and coastal development, altered hydrology, sea-level rise, and nutrient overenrichment. Variations in…	0	0	1	1	Non-specific	NA	Feller-2010-Biocomplexity in mangrove ecosyste.pdf	6	North America	USA	Australia	Germany	USA	USA	Australia
422	Ferndes	1999	265	Ferndes-1999-Multiple criteria alysis inte.pdf	Multiple criteria alysis integrates economic, ecological and social objectives for coral reef magers	NA	Managing a coral reef in a small island state is a di$cult task. Apart from having con#icting objectives and few data there is the added problem of how to evaluate the less tangible bene"ts of management. This study reports the successful use of multiple criteria analysis to help the managers of a coral reef to make &&good'' decisions. &&Good'' decisions are consistent with the community's desire…	0	0	1	1	Caribbean	NA	Fernandes-1999-Multiple criteria analysis inte.pdf	3	North America	USA	USA	Netherlands Antilles
423	Ferndes	2015	266	Ferndes-2015-Atlantic surgeonfishes bear onl.pdf	Atlantic surgeonfishes bear only minor microstructural changes in highly derived karyotypes	NA	Acanthurus is a representative and widespread genus of marine fish that plays a key role in ecological dynamics of coral reefs. Three species are common along coastal reefs of Western Atlantic: A. coeruleus, A. bahianus, and A. chirurgus. The cytogenetic patterns of these species indicated sequential steps of chromosomal rearrangements dating back 195 millions of years ago (M.a.) that accounted …	0	1	0	1	South America	NA	Fernandes-2015-Atlantic surgeonfishes bear onl.pdf	6	South America	Brazil	Brazil	Brazil	Brazil	Brazil	Brazil
424	Fernöndez-lamo	2006	267	FerÌndez-AÌlamo-2006-Zooplankton and the ocean.pdf	Zooplankton and the oceanography of the eastern tropical Pacific: A review	NA	We review the spatial and temporal patterns of zooplankton in the eastern tropical Pacific Ocean and relationships with oceanographic factors that affect zooplankton distribution, abundance and trophic relationships. Large-scale spatial patterns of some zooplankton groups show broad coincidence with surface water masses, circulation, and upwelling regions, in agreement with an ecological and dyna…	0	1	0	1	Pacific Islands	NA	Ferna?ndez-A?lamo-2006-Zooplankton and the ocean.pdf	2	Central America	Mexico	Mexico
425	Ferreira	2013	268	Ferreira-2013-Habitat use of the nurse shark.pdf	Habitat use of the nurse shark, Ginglymostoma cirratum , off Recife, Northeast Brazil: a combined survey with longline and acoustic telemetry	Habitat use of the nurse shark, Ginglymostoma cirratum, off Recife, Northeast Brazil: A combined survey with longline and acoustic telemetry	The nurse shark, Ginglymostoma cirratum, is an abundant coastal species widely distributed on both sides of the tropical and subtropical Atlantic Ocean. Despite being an endangered species in Brazil, information on bio-ecological aspects of this species is still very scarce. This study investigates seasonal fluctuations in abundance, sex ratio and residency of nurse sharks in coastal waters off R…	0	1	0	1	South America	NA	Ferreira-2013-Habitat use of the nurse shark.pdf	4	South America	Brazil	Brazil	Brazil	Brazil
428	Ferrol-Schulte	2013	269	Ferrol-Schulte-2013-Sustaible Livelihoods Ap.pdf	Sustaible Livelihoods Approach in tropical coastal and marine social-ecological systems: A review	Sustainable Livelihoods Approach in tropical coastal and marine social-ecological systems: A review	Tropical coastal and marine socialecological systems (CM-SESs) differ from other socialecological systems through the higher degree of risk and uncertainty associated with coastal and marine resource extraction, the dynamic nature of aquatic and human resources, and often unclear tenure. CM-SES resource management and poverty-alleviation strategies must be adaptive and holistic. The Sustainable…	0	1	0	1	Southeast Asia	NA	Ferrol-Schulte-2013-Sustainable Livelihoods Ap.pdf	4	Europe	Germany	Germany	Germany	Germany
429	Ferrol-Schulte	2014	270	Ferrol-Schulte-2014-Patron-client relationship.pdf	Patroneclient relationships, livelihoods and tural resource magement in tropical coastal communities	Patron-client relationships, livelihoods and natural resource management in tropical coastal communities	Coastal and marine management cannot ignore the role of community livelihoods and vulnerability if it is to be effective and just, especially when the targeted coastal communities are highly resourcedependent. Previous studies have highlighted the potential role that patrons, or middlemen, can play as knowledge-brokers in marine natural resource management. On Zanzibar, where small-scale fishing …	0	1	0	1	Eastern Africa	NA	Ferrol-Schulte-2014-Patron-client relationship.pdf	3	Europe	Germany	Germany	Germany
431	Fidelman	2012	271	Fidelman-2012-Mapping seascapes of intertion.pdf	Mapping seascapesofintertiolenvironmentalarrangementsinthe Coral Triangle	Mapping seascapes of international environmental arrangements in the Coral Triangle	The Coral Triangle Initiative on Coral Reefs, Fisheries and Food Security (CTI), adopted recently in response to the degradation of coastal and marine environments in the Southeast Asia-Pacifics Coral Triangle, emphasises the need for using existing international and regional fora to promote implementation. Large-scale marine initiatives, including the CTI, very often must contend with a remarka…	0	0	1	1	Southeast Asia	NA	Fidelman-2012-Mapping seascapes of internation.pdf	2	Australia and NZ	Australia	USA
432	Fidelman	2014	272	Fidelman-2014-Coalition cohesion for regiol.pdf	Coalition cohesion for regiol marine governce: A stakeholder alysis of the Coral Triangle Initiative	Coalition cohesion for regional marine governance: A stakeholder analysis of the Coral Triangle Initiative	The state of Bahia has the largest coastal extension among all Brazilian states. This extension includes some of the most desirable tourist destinations within the country. The local preference is directed to the model "sun, sand and sea." The Marau Peninsula represents one of the most important drivers of economic development in the region. The intensification of activities on the beaches of Mar…	0	0	1	1	Southeast Asia	NA	Fidelman-2014-Coalition cohesion for regional.pdf	6	Australia and NZ	Australia	Australia	Australia	USA	Sweden	USA
433	Filho	2011	273	Filho-2011-Socio-environment alysis as a too.pdf	Socio-Environment Alysis as a Tool for Coastal 5: the Case of Mara Peninsula, Bahia, Brazil	NA	The vast Brazilian coast harbors unique and diverse reef fish communities. Unfortunately, relatively little is known about the impact of fishing on these fish species, and few management or conservation efforts are being made to protect them. Here, we examine the effect of different levels of protection on the composition, abundance, and size structure of reef fish species along a 2500 km portion…	0	1	0	1	South America	NA	Filho-2011-Socio-environment analysis as a too.pdf	3	South America	Brazil	Brazil	Brazil
436	Floeter	2006	274	Floeter-2006-Effects of fishing and protection.pdf	Effects of fishing and protection on Brazilian reef fishes	Effects of fishing and protection on Brazilian reef fishes	The vast Brazilian coast harbors unique and diverse reef fish communities. Unfortunately, relatively little is known about the impact of fishing on these fish species, and few management or conservation efforts are being made to protect them. Here, we examine the effect of different levels of protection on the composition, abundance, and size structure of reef fish species along a 2500 km portion…	0	0	1	1	South America	NA	Floeter-2006-Effects of fishing and protection.pdf	3	North America	USA	USA	Brazil
439	Foale	2004	275	Foale_et_al-2004-Asia_Pacific_Viewpoint.pdf	Social and political barriers to the use of Marine Protected Areas for conservation and fishery magement in Pacific Islands	Social and political barriers to the use of Marine Protected Areas for conservation and fishery management in Melanesia	In this paper we examine the strengths and weaknesses of state-supported Customary Marine Tenure (CMT) systems in two independent Melanesian states (Solomon Islands and Papua New Guinea) in the context of the management of rapidly intensifying commercial and subsistence fisheries. We focus particularly on the proposed use of permanent no-take Marine Protected Areas (MPAs), which are at present st…	0	1	0	1	Pacific Islands	NA	Foale_et_al-2004-Asia_Pacific_Viewpoint.pdf	2	Australia and NZ	Australia	Australia
440	Foale	2013	276	Foale-2013-Food security and the Coral Triangl.pdf	Food security and the Coral Triangle Initiative	Food security and the Coral Triangle Initiative	The Asia-Pacific's Coral Triangle is defined by its extremely high marine biodiversity. Over one hundred million people living in its coastal zones use this biodiversity to support their livelihoods. Hundreds of millions more derive nutritious food directly from the region?s marine resources and through local, regional and global trade. Biodiversity and its values to society are threatened by dem…	0	0	1	1	Southeast Asia	NA	Foale-2013-Food security and the Coral Triangl.pdf	13	Australia and NZ	Australia	Indonesia	Philippines	Malaysia	Malaysia	Australia	Australia	Australia	Australia	Australia	Australia	Switzerland	Malaysia
442	Forbes	2013	277	Forbes-2013-Physical basis of coastal adaptati.pdf	Physical basis of coastal adaptation on tropical small islands	Physical basis of coastal adaptation on tropical small islands	Small tropical islands are widely recognized as having high exposure and vulnerability to climate change and other natural hazards. Ocean warming and acidification, changing storm patterns and intensity, and accelerated sea-level rise pose challenges that compound the intrinsic vulnerability of small, remote, island communities. Sustainable development requires robust guidance on the risks associ…	0	0	1	1	Non-specific	NA	Forbes-2013-Physical basis of coastal adaptati.pdf	4	North America	Canada	Canada	Trinidad & Tobago	Canada
446	FRANCINI-FILHO	2008	278	Francini-Filho-2008-Dymics of fish assemblag.pdf	Dymics of fish assemblages on coral reefs subjected to different magement regimes in the Abrolhos Bank, eastern Brazil	NA	1. Marine protected areas (MPAs) range from multiple-use areas (MUA) to absolute no-take reserves (NTR). Despite their importance for fisheries management, there are few long-term studies comparing benefits from different types of MPAs within the same region. 2. Fish assemblages were monitored for five years (20012005) in the largest coral reefs in the South Atlantic (Abrolhos Bank, Brazil). Mon…	0	1	0	1	South America	NA	Francini-Filho-2008-Dynamics of fish assemblag.pdf	2	South America	Brazil	Brazil
447	FRANCO-GORDO	2008	279	Franco-Gordo-2008-Interannual and seasol var.pdf	Interannual and seasol variability of the diversity and structure of ichthyoplankton assemblages in the central Mexican Pacific	NA	We examined larval fish diversity and assemblage structure off the central coast of the Mexican Pacific from December 1995 through December 1998, including the 199798 El Nino event. A total of 132 taxa were recorded, the dominant species being Bregmaceros bathymaster , Dormitator latifrons , and Harengula thrissina (90, 1.9, and 0.8% of the total abundance, respectively). Only B. bathymaster , …	0	0	1	1	Central America	NA	Franco-Gordo-2008-Interannual and seasonal var.pdf	4	Central America	Mexico	Mexico	Mexico	Spain
449	Fredou	2006	280	FreÌdou-2006-A univariate and multivariate stud.pdf	A univariate and multivariate study of reef fisheries off northeastern Brazil	NA	This work was part of a programme to assess the potential living resources within the Exclusive Economic Zone (EEZ) of Brazil that collected information on the catch composition and biology of the main species within the zone (REVIZEE). It aimed to identify and, using statistical tools, to assess the factors that influence the dynamics of the demersal fishery, targeting the rocky, coral reef and …	0	0	1	1	South America	NA	Fre?dou-2006-A univariate and multivariate stud.pdf	3	Europe	France	Brazil	France
451	Freed	2014	281	Freed-2014-Effects of Human Activities on the5.pdf	Effects of Human Activities on the Worlds Most Vulnerable Coral Reefs: Comoros Case Study	Effects of Human Activities on the World's Most Vulnerable Coral Reefs: Comoros Case Study	Effective management of highly biodiverse and threatened reefs requires the identification of human activities driving declines on the particular reef to be managed. The island nation of the Comoros is a model setting to investigate effects of human activities on diverse and threatened coral reefs, with abundant and diverse marine life, local dependence on reef resources, and a variety of anthrop…	0	1	0	1	Eastern Africa	NA	Freed-2014-Effects of Human Activities on the5.pdf	2	North America	USA	USA
452	Fricke	2011	282	Fricke-2011-Depth-related variation in epiphyt.pdf	Depth-related variation in epiphytic communities growing on the brown alga Lobophora variegata in a Caribbean coral reef	Depth-related variation in epiphytic communities growing on the brown alga Lobophora variegata in a Caribbean coral reef	Lobophora variegata is a dominant macroalga on coral reefs across the Caribbean. Over the last two decades, it has expanded its vertical distribution to both shallow and deep reefs along the leeward coast of the island of Curac¸ao, Southern Caribbean. However, the ecological implications of this expansion and the role of L. variegata as a living substratum are poorly known. This study compared ep…	0	0	1	1	Caribbean	NA	Fricke-2011-Depth-related variation in epiphyt.pdf	4	Europe	Germany	Russia	Germany	Germany
453	Frisch	2012	283	Frisch-2012-Effects of spearfishing on reef fi.pdf	Effects of Spearfishing on Reef Fish Populations in a Multi-Use Conservation Area	Effects of Spearfishing on Reef Fish Populations in a Multi-Use Conservation Area	Although spearfishing is a popular method of capturing fish, its ecological effects on fish populations are poorly understood, which makes it difficult to assess the legitimacy and desirability of spearfishing in multi-use marine reserves. Recent management changes within the Great Barrier Reef Marine Park (GBRMP) fortuitously created a unique scenario by which to quantify the effects of spearfis…	0	1	0	1	Australia and NZ	NA	Frisch-2012-Effects of spearfishing on reef fi.pdf	5	Australia and NZ	Australia	Australia	Australia	Australia	Australia
454	Fuentes	2011	284	Fuentes-2011-Relationship between tropical cyc.pdf	Relationship between tropical cyclones and the distribution of sea turtle nesting grounds	Relationship between tropical cyclones and the distribution of sea turtle nesting grounds	Aim This study examines the relationship between the distribution of existing sea turtle nesting sites and historical patterns of tropical cyclone events to investigate whether cyclones influence the current distribution of sea turtle nesting sites. The results, together with information on predicted cyclone activity and other key environmental variables, will help in the identification and predi…	0	1	0	1	Australia and NZ	NA	Fuentes-2011-Relationship between tropical cyc.pdf	3	Australia and NZ	Australia	Australia	Australia
509	Graham	2011	285	fulltext.pdf	From microbes to people: tractable benefits of notake areas for coral reefs	From microbes to people: Tractable benefits of no-take areas for coral reefs	The number of no-take marine protected areas (here referred to as no-take areas, NTAs) on coral reefs has increased considerably in recent decades. Coincident with accelerating degradation of coral reefs, expectations of the benefits that NTAs can provide for coastal societies and sustainability of marine ecosystems has grown. These include increasing abundance of reef organisms both inside and o…	0	1	0	1	Non-specific	NA	fulltext.pdf	18	Australia and NZ	Australia	Australia	Australia	Australia	Australia	Australia	Australia	Australia	Australia	Australia	Australia	Australia	Australia	Australia	Australia	Australia	Australia	Australia
456	Furs	2005	286	Furs-2005-In the other 90%_ Phytoplankton re.pdf	In the other 90%: phytoplankton responses to enhanced nutrient availability in the Great Barrier Reef Lagoon	NA	Our view of how water quality effects ecosystems of the Great Barrier Reef (GBR) is largely framed by observed or expected responses of large benthic organisms (corals,algae,seagrasses) to enhanced levels of dissolved nutrients,sediments and other pollutants in reef waters. In the case of nutrients,however,benthic organisms and communities are largely responding to materials which have cycled thr…	0	1	0	1	Australia and NZ	NA	Furnas-2005-In the other 90%_ Phytoplankton re.pdf	4	Australia and NZ	Australia	Australia	Australia	Australia
467	GARCIA-QUIJANO	2007	287	GARC%CDA_QUIJANO-2007-American_Anthropologist.pdf	Fishers 8 of Marine Species Assemblages: Bridging between Scientific and Local Ecological 8 in Southeastern Puerto Rico	NA	Increasingly, local ecological knowledge (LEK) held by groups of people engaging directly with their ecosystems for food production is recognized as a valuable tool for understanding environmental change, as well as for ecosystem management and conservation. However, the acceptance of LEK for resource management has been partly hindered by difficulties in translating local knowledge into a form t…	0	1	0	1	Caribbean	NA	GARC%CDA_QUIJANO-2007-American_Anthropologist.pdf	2	North America	USA	USA
464	Garces	2013	288	Garces-2013-Evaluating the magement effectiv.pdf	Evaluating the magement effectiveness of three marine protected areas in the Calamianes Islands, Palawan Province, Philippines: Process, selected results and their implications for planning and magement	Evaluating the management effectiveness of three marine protected areas in the Calamianes Islands, Palawan Province, Philippines: Process, selected results and their implications for planning and management	Evaluating the management effectiveness of marine protected areas (MPAs) has been a continuing challenge in marine conservation in the tropics. This paper describes the process involved, the chosen indicators and the selected results of the evaluation of management effectiveness of three MPAs in the Calamianes Islands, Palawan Province, Philippines. The evaluation was a participatory process that…	0	1	0	1	Southeast Asia	NA	Garces-2013-Evaluating the management effectiv.pdf	4	Southeast Asia	Philippines	Philippines	Philippines	Philippines
463	Garcêa-Hernöndez	2014	289	GarciÌa-HerÌnde-2014-Comparison of ecological.pdf	Comparison of ecological diversity and species composition of macroalgae, benthic macroinvertebrates, and fish assemblages between two tropical rocky reefs	NA	Within the marine environment, the rocky shores are recognized for their high species diversity and particularly transitional zones represent areas of biotic mix, promoted by historical and ecological natural variations that allow the presence of taxa from different regions and which present dissimilar biological traits. An extensive survey describes the benthic macroalgae, macroinvertebrates (mo…	0	1	0	1	Central America	NA	Garci?a-Herna?nde-2014-Comparison of ecological.pdf	6	Central America	Mexico	Mexico	Mexico	Mexico	Mexico	Mexico
469	Garnier	2011	290	Garnier-2012-Status and community-based conser.pdf	Status and community-based conservation of marine turtles in the northern Querimbas Islands (Mozambique)	NA	Situated in the northernmost part of Mozambique, the northern Querimbas Islands support some of the most diverse and pristine coral reefs in the Western Indian Ocean. The community-based turtle conservation programme that we developed on Vamizi Island has facilitated the identifi cation and protection of a key nesting site for the green marine turtle Chelonia mydas in Mozambique, with a mean of 1…	0	0	1	1	Eastern Africa	NA	Garnier-2012-Status and community-based conser.pdf	6	Europe	UK	UK	Mozambique	Mozambique	UK	UK
470	Garren	2006	291	Garren-2006-Patterns of association between Sy.pdf	Patterns of association between Symbiodinium and members of the Montastraea annularis species complex on spatial scales ranging from within colonies to between geographic regions	Patterns of association between Symbiodinium and members of the Montastraea annularis species complex on spatial scales ranging from within colonies to between geographic regions	Patterns of associations between coral colonies and the major clades of zooxanthellae can vary across scales ranging from individual colonies to widely separated geographic regions. This is exempliW ed in this study of the Montastraea annularis species complex from six sites on the Mesoamerican Reef, Belize and nine sites in the Bocas del Toro archipelago, Panama. Restriction fragment length poly…	0	1	0	1	Central America	NA	Garren-2006-Patterns of association between Sy.pdf	4	North America	USA	USA	USA	USA
472	Gavio	2010	292	Gavio-2010-Historical alysis (2000-2005) of.pdf	Historical alysis (2000_2005) of the coastal water quality in San Andr_s Island, SeaFlower Biosphere Reserve, Caribbean Colombia	Historical analysis (2000-2005) of the coastal water quality in San Andrés Island, SeaFlower Biosphere Reserve, Caribbean Colombia	To understand the coastal water quality of San Andrès Island, and provide tools for the management of its marine resources, we present the historical analysis of the island monitoring, which includes ammonia, nitrites, nitrate, phosphates, fecal and total coliforms. The anthropogenic pressure on the coastal system is heavy, with water nutrification, posing at risk seagrass and coral ecosystems. D…	0	1	0	1	Central America	NA	Gavio-2010-Historical analysis (2000-2005) of.pdf	3	South America	Colombia	Colombia	Colombia
476	Geister	1983	293	Geister-1983-Holocene West Indian coral reefs_.pdf	Holocene West Indian Coral Reefs: Geomorphology, Ecology and Facies	NA	The great diversity of Recent coral reefs encountered in the West Indian seas is clearly demonstrated by their diverging size, outline, topography, internal structured sedimentary and erosional environments and by the distribution of their reef building biota. The reasons for this diversity are multiple and complex, They are mostly physical and biological in nature and there is also a strong hist…	1	0	0	1	Caribbean	NA	Geister-1983-Holocene West Indian coral reefs_.pdf	1	Europe	Switzerland
478	Gershwin	2009	294	Gershwin-2010-Marine Stingers_ Review of an Un.pdf	Marine Stingers: Review of an Under- Recognized Global Coastal 5 Issue	NA	Dangerous marine stingers (jellyfish) are an emotive issue in tropical Australia, where they are widely regarded as the number one marine health threat. However, numerous severe and fatal stings have been reported throughout the tropical and temperate seas of the world, indicating that marine stingers are a global health problem. Further, life-threatening jellyfish stings are more frequently repo…	0	1	0	1	Australia and NZ	NA	Gershwin-2010-Marine Stingers_ Review of an Un.pdf	4	Australia and NZ	Australia	Australia	Australia	Australia
479	Ghaderi	2013	295	Ghaderi-2013-Japanese tsumi debris and the t.pdf	Japanese tsumi debris and the threat to sustaible tourism in the Hawaiian Islands	Japanese tsunami debris and the threat to sustainable tourism in the Hawaiian Islands	This paper discusses the possible effects of the debris resulting fromthe tsunami following the earthquakewhich struck Japan inMarch 2011 with particular reference to sustainable tourism in the Hawaiian Islands. Attention is also given to the more immediate consequences of the disaster for the arrival of Japanese tourists in Hawaii and marketing efforts to contain the initial fall in demand. Draw…	0	0	1	1	Hawaii	NA	Ghaderi-2013-Japanese tsunami debris and the t.pdf	2	Southeast Asia	Malaysia	Singapore
484	Giles	2014	296	Giles-2014- Extensive genetic population structure in the Indo-West Pacific spot-tail shark, Carcharhinus sorrah.pdf	Extensive genetic population structure in the Indo_West Pacific spot-tail shark, Carcharhinus sorrah	Extensive genetic population structure in the Indo-West Pacific spot-tail shark, Carcharhinus sorrah	Carcharhinus sorrah (Mu?lle and Henle, 1839) is a coastal pelagic shark of the tropical and subtropical IndoWest Pacific, reaching 1.6 m total length. The species is widely harvested in line, net, and trawl fisheries over tropical continental shelves. We investigated mtDNA genetic differentiation in C. sorrah across the majority of the species range, and examined the importance of six major his…	0	0	1	1	Pacific Islands	NA	Giles-2014- Extensive genetic population structure in the Indo-West Pacific spot-tail shark	8	Australia and NZ	Australia	Australia	Indonesia	UK	Philippines	Thailand	India	Australia
485	Gillis	2014	297	Gillis-2014-Potential for landscape-scale posi.pdf	Potential for landscape-scale positive interactions among tropical marine ecosystems	Potential for landscape-scale positive interactions among tropical marine ecosystems	Fluxes of energy, materials and organisms among ecosystems are consequences of their openness to exchange and lead to the consideration of reciprocal connections among adjacent ecosystems. Reciprocal connectivity may have implications for ecosystem functioning and management but it is generally studied only for a single factor, rather than for multiple factors. We examined the extent to which the…	0	0	1	1	Non-specific	NA	Gillis-2014-Potential for landscape-scale posi.pdf	8	Europe	Netherlands	Netherlands	USA	Netherlands	Australia	Netherlands	Netherlands	Singapore
486	Giri	2015	298	Giri-2015-Distribution and dymics of mangrov.pdf	Distribution and dymics of mangrove forests of South Asia	Distribution and dynamics of mangrove forests of South Asia	Mangrove forests in South Asia occur along the tidal sea edge of Bangladesh, India, Pakistan, and Sri Lanka. These forests provide important ecosystem goods and services to the regions dense coastal populations and support important functions of the biosphere. Mangroves are under threat from both natural and anthropogenic stressors; however the current status and dynamics of the regions mangrov…	0	0	1	1	Southwest Asia	NA	Giri-2015-Distribution and dynamics of mangrov.pdf	7	North America	USA	USA	Pakistan	India	Nepal	USA	USA
488	Gladstone	2000	299	Gladstone-2000-The ecological and social basis.pdf	The ecological and social basis for magement of a Red Sea marine-protected area	The ecological and social basis for management of a Red Sea marine-protected area	The Farasan Islands in the southern Red Sea of Saudi Arabia have nationally and internationally signi®cant conservation values, and are important for a range of marine-based resource uses. In preparation for the establishment of a marine protected area around the Farasan Islands and its management, surveys were undertaken to assess the state of the coastal and marine resources, and the issues ass…	1	0	0	1	Southwest Asia	NA	Gladstone-2000-The ecological and social basis.pdf	1	Southwest Asia	Saudi Arabia
506	Gppazham	2014	300	Gppazham-2014-Response of mangroves to the.pdf	Response of mangroves to the change in tidal and fresh water flow e A case study in Pichavaram, South India	NA	Mangroves grow in intertidal zone of tropical coasts and nourished by the influence of freshwater and tidal water added to local rainfall. This study attempts to spatially analyse such hydrological influence on the mangrove area over seven decades in Pichavaram, a wetland of South Indian East coast. Analysis of local rainfall, freshwater and tidal flow and spatial maps derived using Geographic In…	0	1	0	1	Southwest Asia	NA	Gnanappazham-2014-Response of mangroves to the.pdf	2	Southwest Asia	India	India
490	godinez-dominguez	2009	301	Godnez-Domnguez-2009-Decomposing diversity pat.pdf	Decomposing diversity patterns of a soft-bottom macroinvertebrate community in the tropical eastern Pacific	NA	Diversity is one of the most frequently used attributes of ecological communities, and there is a long-standing discussion about their adequate use, calculus and interpretation. One of the most conspicuous and simple diversity estimators is species richness, but it has been criticized by recurrent pitfalls, which has biased comparisons and the testing of hypotheses. Otherwise, synthetic ecologica…	0	0	1	1	Central America	NA	Godnez-Domnguez-2009-Decomposing diversity pat.pdf	4	Central America	Mexico	Spain	Mexico	Cuba
498	Gonzalez	2011	302	Gonzalez-2011-MPA in labor_ Securing the Pearl.pdf	MPA in Labor: Securing the Pearl Cays of Nicaragua	MPA in labor: Securing the Pearl Cays of Nicaragua	Implementation of Marine Protected Areas (MPAs) has always a step-zero, i.e., an initial phase when the idea is incepted, communicated and negotiated among stakeholders. What happens during this phase is likely to have an impact later on. If not done right, the management of the MPA may encounter problems at later stage that will be difficult to correct. Inspired by this working theory, this arti…	0	0	1	1	Central America	NA	Gonzalez-2011-MPA in labor_ Securing the Pearl.pdf	2	Central America	Nicaragua	Norway
503	Gordon	2007	303	Gordon-2007-Linking land to ocean_ Feedbacks i.pdf	Linking land to ocean: feedbacks in the magement of socio-ecological systems in the Great Barrier Reef catchments	Linking land to ocean: Feedbacks in the management of socio-ecological systems in the Great Barrier Reef catchments	The Great Barrier Reef (GBR) off Australias northeast coast is one of the natural wonders of the world. As a consequence it has high value, not only for biodiversity, but also for tourists who come to see the GBR and the biodiversity associated with it, bringing in over A$3.5B per annum to the Australian economy. However, there are a number of natural and anthropogenic factors that are threateni…	1	0	0	1	Australia and NZ	NA	Gordon-2007-Linking land to ocean_ Feedbacks i.pdf	1	Australia and NZ	Australia
504	GOSSLING	2004	304	GoÌssling-2004-Use of molluscs, fish, and other.pdf	Use of molluscs, fish, and other marine taxa by tourism in Zanzibar, Tanzania	NA	The collection of shells is a popular tourist activity in coastal areas of tropical countries. Tourists also buy shells, particularly large gastropods, which may be important species in marine ecosystems. While some, though outdated, information exists on the magnitude of the international trade with ornamental shells, virtually nothing is known about the extent of the regional tourist-related cu…	0	0	1	1	Eastern Africa	NA	Go?ssling-2004-Use of molluscs	4	Europe	Sweden	Germany	Germany	Germany
505	Gourbesville	2000	305	Gourbesville-2000-Coastal environment assessme.pdf	Coastal environment assessment procedure for sustaible wastewater magement in tropical islands: the Mayotte example	Coastal environment assessment procedure for sustainable wastewater management in tropical islands: The Mayotte example	The recent evolution of the coastal environment is characterized by an increase of human potential impacts: coastal zone is located at the cross-road of sectoral issues which give rise to a number of often competing uses. Today, the main challenges in the coastal environment management are not derived from ``technical problems'' but correspond to the global coastal management and to the means to …	0	1	0	1	Eastern Africa	NA	Gourbesville-2000-Coastal environment assessme.pdf	2	Europe	France	France
512	Graham	2015	306	Graham_etal_2015.pdf	Predicting climate-driven regime shifts versus rebound potential in coral reefs	Predicting climate-driven regime shifts versus rebound potential in coral reefs	Climate-induced coral bleaching is among the greatest current threats to coral reefs, causing widespread loss of live coral cover1.Conditions under which reefs bounce back from bleaching events or shift from coral to algal dominance are unknown, making it difficult to predict and plan for differing reef responses under climate change2. Herewe document and predict long-term reef responses to a maj…	0	0	1	1	Non-specific	NA	Graham_etal_2015.pdf	5	Australia and NZ	Australia	UK	Australia	Australia	Australia
508	Graham	2007	307	Graham-2007-Anthropogenic stressors, inter-spe.pdf	Anthropogenic stressors, inter-specific competition and ENSO effects on a Mauritian coral reef	Anthropogenic stressors, inter-specific competition and ENSO effects on a Mauritian coral reef	Much of the western Indian Ocean suffered widespread loss of live coral in 1998 and interest is now focussed on the indirect effects of this coral loss on other components of the ecosystem, in particular fishes. However, it is just as important to identify changes in fish assemblages at locations that did not suffer coral mortality to understand local versus regional drivers. We surveyed benthic …	0	0	1	1	Eastern Africa	NA	Graham-2007-Anthropogenic stressors	4	Europe	UK	USA	France	France
511	Graham	2013	308	Graham-2013-Maging resilience to reverse pha.pdf	Maging resilience to reverse phase shifts in coral reefs	The last call for marine wilderness?	Both coral-dominated and degraded reef ecosystems can be resistant to change. Typically, research and management have focused on maintaining coral dominance and avoiding phase shifts to other species compositions, rather than on weakening the resilience of already degraded reefs to re-establish coral dominance. Reversing degraded coral-reef states will involve reducing local chronic drivers like …	0	0	1	1	Non-specific	NA	Graham-2013-Managing resilience to reverse pha.pdf	6	Australia and NZ	Australia	Australia	Australia	Australia	Sweden	Sweden
510	Graham	2013	309	Graham-2013-The last call for marine wildernes.pdf	The Last Call for Marine Wilderness?	The last call for marine wilderness?	Wilderness areas have been widely discussed in the terrestrial conservation literature, whereas the concept of marine wilderness has received scant attention. The recent move to protect very large areas of the ocean and thus preserve some of the final marine wilderness areas is a bold policy initiative. However, some important questions have remained unanswered, such as whether marine wilderness …	0	0	1	1	Southwest Asia	NA	Graham-2013-The last call for marine wildernes.pdf	2	Australia and NZ	Australia	USA
514	Granek	2008	310	Granek-2008-Changes in biotic and abiotic proc.pdf	Changes in biotic and abiotic processes following mangrove clearing	Changes in biotic and abiotic processes following mangrove clearing	Mangrove forests, important tropical coastal habitats, are in decline worldwide primarily due to removal by humans. Changes to mangrove systems can alter ecosystem properties through direct effects on abiotic factors such as temperature, light and nutrient supply or through changes in biotic factors such as primary productivity or species composition. Despite the importance of mangroves as transi…	0	1	0	1	Central America	NA	Granek-2008-Changes in biotic and abiotic proc.pdf	2	North America	USA	USA
515	Granek	2009	311	Granek-2009-Mangrove-exported nutrient incorpo.pdf	Mangrove-Exported Nutrient Incorporation by Sessile Coral Reef Invertebrates	Mangrove-exported nutrient incorporation by sessile coral reef invertebrates	Coastal mangrove forests were historically considered as a source of organic matter (OM) for adjacent marine systems due to high net primary production; yet recent research suggesting little uptake through the food web because of low nutritional quality, challenges the concept of trophic linkage between mangrove forests and coral reefs. To examine the importance of mangrove forests to coral reef …	0	1	0	1	Central America	NA	Granek-2009-Mangrove-exported nutrient incorpo.pdf	3	North America	USA	USA	USA
517	Grech	2011	312	Grech-2011-A broad-scale assessment of the ris.pdf	A broad-scaleassessmentoftherisktocoastalseagrassesfrom cumulative threats	Interactions between a trawl fishery and spatial closures for biodiversity conservation in the Great Barrier reef World Heritage Area, Australia	Informing the management of coastal marine habitats at broad spatial scales is difficult because of the costs associated with collecting and analyzing ecological data at that scale. Spatially explicit assessments of the risk to coastal marine habitats from cumulative threats provide an alternative approach by identifying sites that are exposed to multiple anthropogenic threats at broad scales. In…	0	1	0	1	Australia and NZ	NA	Grech-2011-A broad-scale assessment of the ris.pdf	3	Australia and NZ	Australia	Australia	Australia
518	Grech	2011	312	Grech-2011-A broad-scale assessment of the ris.pdf	A broad-scaleassessmentoftherisktocoastalseagrassesfrom cumulative threats	A broad-scale assessment of the risk to coastal seagrasses from cumulative threats	Informing the management of coastal marine habitats at broad spatial scales is difficult because of the costs associated with collecting and analyzing ecological data at that scale. Spatially explicit assessments of the risk to coastal marine habitats from cumulative threats provide an alternative approach by identifying sites that are exposed to multiple anthropogenic threats at broad scales. In…	0	1	0	1	Australia and NZ	NA	Grech-2011-A broad-scale assessment of the ris.pdf	3	Australia and NZ	Australia	Australia	Australia
521	Grech	2014	313	Grech-2014-Local assessments of marine mammals.pdf	Local assessments of marine mammals in cross-cultural environments	Local assessments of marine mammals in cross-cultural environments	Biodiversity assessments by research scientists are often logistically difficult and expensive to implement in remote areas. Locally-based approaches have the potential to overcome some of these challenges by capitalising on the knowledge and capacity of local people. Many Indigenous people in northern Australia are custodians of coastal areas that support globally significant populations of trop…	0	1	0	1	Australia and NZ	NA	Grech-2014-Local assessments of marine mammals.pdf	9	Australia and NZ	Australia	Australia	Australia	Australia	Australia	Australia	Australia	Australia	Australia
528	Green	2011	314	Green-2011-Spatio-temporal variability of cora.pdf	Spatio-temporal variability of coral recruitment on shallow reefs in St. John, US Virgin Islands	Emerging marine protected area networks in the coral triangle: Lessons and way forward	In this study, coral recruitment was measured on a kilometer-wide scale over two years on shallow (56m depth) fringing reefs in St. John,US Virgin Islands,with the objective of determining the extent towhich variation in recruitment was affected by biophysical coupling involving temperature and flow. Coral recruitment was measured using settlement tiles deployed at 10 sites along 10 kmof shore. …	1	0	0	1	Caribbean	NA	Green-2011-Spatio-temporal variability of cora.pdf	1	North America	USA
529	Green	2011	314	Green-2011-Spatio-temporal variability of cora.pdf	Spatio-temporal variability of coral recruitment on shallow reefs in St. John, US Virgin Islands	Spatio-temporal variability of coral recruitment on shallow reefs in St. John, US Virgin Islands	In this study, coral recruitment was measured on a kilometer-wide scale over two years on shallow (56m depth) fringing reefs in St. John,US Virgin Islands,with the objective of determining the extent towhich variation in recruitment was affected by biophysical coupling involving temperature and flow. Coral recruitment was measured using settlement tiles deployed at 10 sites along 10 kmof shore. …	1	0	0	1	Caribbean	NA	Green-2011-Spatio-temporal variability of cora.pdf	1	North America	USA
530	Green	2014	315	Green-2014-Designing Marine Reserves for Fishe.pdf	Designing Marine Reserves for Fisheries 5, Biodiversity Conservation, and Climate Change Adaptation	Designing Marine Reserves for Fisheries Management, Biodiversity Conservation, and Climate Change Adaptation	Overfishing and habitat destruction due to local and global threats are undermining fisheries, biodiversity, and the long-term sustainability of tropical marine ecosystems worldwide, including in the Coral Triangle. Well-designed and effectively managed marine reserve networks can reduce local threats, and contribute to achieving multiple objectives regarding fisheries management, biodiversity co…	0	0	1	1	Non-specific	NA	Green-2014-Designing Marine Reserves for Fishe.pdf	8	Australia and NZ	Australia	Australia	France	Philippines	USA	Philippines	USA	Australia
532	Greiner	2005	316	Greiner-2005-A multi-criteria approach to Grea.pdf	A multi-criteria approach to Great Barrier Reef catchment (Queensland, Australia) diffuse-source pollution problem	NA	This paper presents a multi-criteria based tool for assessing the relative impact of diffuse-source pollution to the Great Barrier Reef (GBR) from the river basins draining into the GBR lagoon. The assessment integrates biophysical and ecological data of water quality and pollutant concentrations with socio-economic information pertaining to non-point source pollution and (potential) pollutant im…	0	1	0	1	Australia and NZ	NA	Greiner-2005-A multi-criteria approach to Grea.pdf	4	Australia and NZ	Australia	Australia	Australia	Australia
538	Grol	2014	317	Grol-2014-Growth potential and predation risk.pdf	Growth potential and predation risk drive ontogenetic shifts among nursery habitats in a coral reef fish	Growth potential and predation risk drive ontogenetic shifts among nursery habitats in a coral reef fish	Various species of aquatic animals have complex life cycles and utilize different habitats during consecutive phases of their life cycles. For example, many marine fish species occupy different habitat types during juvenile and adult life stages. Juveniles of some species recruit to inshore nursery habitats such as mangroves and seagrass beds, whereas large adults tend to dominate coral reefs. Th…	0	0	1	1	Caribbean	NA	Grol-2014-Growth potential and predation risk.pdf	3	Europe	Netherlands	USA	Netherlands
539	Gross	2009	318	Gross-2009-A prelimiry study of habitat and.pdf	A prelimiry study of habitat and resource partitioning among co-occurring tropical dolphins around Mayotte, southwest Indian Ocean	A preliminary study of habitat and resource partitioning among co-occurring tropical dolphins around Mayotte, southwest Indian Ocean	Mayotte in the southwest Indian Ocean is characterized by high dolphin diversity. They may coexist within a fairly small area around the island because they exploit neither the same preferential habitats nor the same resources. This preliminary study aimed to investigate ecological niche segregation among these delphinid communities: the Indo-Pacific bottlenose dolphin, Tursiops aduncus, the pant…	0	1	0	1	Eastern Africa	NA	Gross-2009-A preliminary study of habitat and.pdf	5	Europe	France	France	France	France	France
542	Guillemot	2011	319	Guillemot-2011-Functiol redundancy patterns.pdf	Functiol Redundancy Patterns Reveal Non-Random Assembly Rules in a Species-Rich Marine Assemblage	Functional redundancy patterns reveal non-random assembly rules in a species-rich marine assemblage	The relationship between species and the functional diversity of assemblages is fundamental in ecology because it contains key information on functional redundancy, and functionally redundant ecosystems are thought to be more resilient, resistant and stable. However, this relationship is poorly understood and undocumented for species-rich coastal marine ecosystems. Here, we used underwater visual…	0	0	1	1	Pacific Islands	NA	Guillemot-2011-Functional redundancy patterns.pdf	4	Pacific Islands	New Caledonia	France	France	New Caledonia
544	Gullstr_m	2008	320	GullstroÌm-2008-Seagrass structural complexity.pdf	Seagrass structural complexity and landscape conficguration as determints of tropical fish assemblage composition	NA	Seagrass meadows are regularly used by fish as resident, transient, or nursery habitat. However, there is a long-standing debate on how spatial variability of seagrass fish assemblages is determined. We examined the influence of seagrass structural complexity, physical water conditions, and proximity of neighboring shallow-water habitats on tropical fish assemblage composition in a shallow seagra…	0	1	0	1	Eastern Africa	NA	Gullstro?m-2008-Seagrass structural complexity.pdf	4	Europe	Sweden	Sweden	Sweden	Sweden
545	Gullstrom	2011	321	GullstroÌm-2011-Scale-dependent patterns of var.pdf	Scale-dependent patterns of variability of a grazing parrotfish (Leptoscarus vaigiensis) in a tropical seagrass-domited seascape	NA	Although herbivorous fish form critical linkages between primary producers and higher trophic levels, the major factors regulating their spatial structure in seagrass systems remain poorly understood. The present study examined the parrotfish Leptoscarus vaigiensis in seagrass meadows of a tropical embayment in the western Indian Ocean. Stomach content analysis and direct field observations showe…	0	1	0	1	Eastern Africa	NA	Gullstro?m-2011-Scale-dependent patterns of var.pdf	5	Europe	Sweden	Sweden	Sweden	Sweden	Sweden
546	Guti_rrez	2008	322	GutieÌrrez-2008-Oxygetion episodes on the con.pdf	Oxygetion episodes on the continental shelf of central Peru: Remote forcing and benthic ecosystem response	NA	The interplay between the oxygen minimum zone and remotely-forced oxygenation episodes determines the fate of the benthic subsystem off the Central Peruvian coast. We analyzed a 12 year monthly timeseries of oceanographic and benthic parameters at 94 m depth off Callao, Central Peru (12 S), to analyze: (i) near-bottom oxygen level on the continental shelf in relation to dynamic height on the equa…	0	1	0	1	South America	NA	Gutie?rrez-2008-Oxygenation episodes on the con.pdf	6	South America	Peru	Peru	Peru	Peru	Peru	Peru
551	Halpern	2013	323	Halpern-2013-Marine protected areas and resili.pdf	Marine protected areas and resilience to sedimentation in the Solomon Islands	Marine protected areas and resilience to sedimentation in the Solomon Islands	The ability of marine protected areas (MPAs) to provide protection from indirect stressors, via increased resilience afforded by decreased impact from direct stressors, remains an important and unresolved question about the role MPAs can play in broader conservation and resource management goals. Over a five-year period, we evaluated coral and fish community responses inside and outside three MPA…	0	0	1	1	Pacific Islands	NA	Halpern-2013-Marine protected areas and resili.pdf	6	North America	USA	USA	USA	Australia	USA	USA
552	Hamilton	2006	324	Hamilton-2006-Consistent long-term spatial gra.pdf	Consistent long-term spatial gradients in replenishment for an island population of a coral reef fish	Consistent long-term spatial gradients in replenishment for an island population of a coral reef fish	The population replenishment of marine organisms is routinely characterized as highly variable and unpredictable in space and time. Using island-wide recruitment surveys of a common coral reef fish, the bluehead wrasse Thalassoma bifasciatum, in 6 summers spanning a 12 yr period (1991 to 2003), we examined whether spatial patterns of recruitment are consistent or variable through time on St. Croi…	0	0	1	1	Caribbean	NA	Hamilton-2006-Consistent long-term spatial gra.pdf	5	North America	USA	USA	USA	Australia	USA
554	Hamylton	2012	325	Hamylton-2012-Comparing the information conten.pdf	Comparing the information content of coral reef geomorphological and biological habitat maps, Amirantes Archipelago (Seychelles), Western Indian Ocean	Comparing the information content of coral reef geomorphological and biological habitat maps, Amirantes Archipelago (Seychelles), Western Indian Ocean	Increasing the use of geomorphological map products in marine spatial planning has the potential to greatly enhance return on mapping investment as they are commonly two orders of magnitude cheaper to produce than biologically-focussed maps of benthic communities and shallow substrates. The efficacy of geomorphological maps derived from remotely sensed imagery as surrogates for habitat diversity …	0	0	1	1	Eastern Africa	NA	Hamylton-2012-Comparing the information conten.pdf	3	Australia and NZ	Australia	New Caledonia	UK
5		2008	326	Harborne_2008_Ecological-Applications.pdf		NA	The relationship between ecological impact and ecosystem structure is often strongly nonlinear, so that small increases in impact levels can cause a disproportionately large response in ecosystem structure. Nonlinear ecosystem responses can be difficult to predict because locally relevant data sets can be difficult or impossible to obtain. Bayesian networks (BN) are an emerging tool that can help…	0	1	0	1	Non-specific	NA	Harborne_2008_Ecological-Applications.pdf	5	Australia and NZ	Australia	Australia	Australia	Australia	Australia
557	Harborne	2001	327	Harborne-2001-Honduras_ Caribbean Coast.pdf	Honduras: Caribbean Coast	NA	The coast of Honduras, Central America, represents the southern end of the Mesoamerican Barrier Reef System, although its marine resources are less extensive and studied than nearby Belize and Mexico. However, the coastal zone contains mainland reef formations, mangroves, wetlands, seagrass beds and extensive fringing reefs around its offshore islands, and has a key role in the economy of the cou…	0	1	0	1	Central America	NA	Harborne-2001-Honduras_ Caribbean Coast.pdf	3	Europe	UK	UK	UK
558	Harborne	2008	328	Harborne-2008-Tropical coastal habitats as sur.pdf	TROPICAL COASTAL HABITATS AS SURROGATES OF FISH COMMUNITY STRUCTURE, GRAZING, AND FISHERIES VALUE	Tropical coastal habitats as surrogates of fish community structure, grazing, and fisheries value	Habitat maps are frequently invoked as surrogates of biodiversity to aid the design of networks of marine reserves. Maps are used to maximize habitat heterogeneity in reserves because this is likely to maximize the number of species protected. However, the techniques efficacy is limited by intra-habitat variability in the species present and their abundances. Although communities are expected to…	0	0	1	1	Caribbean	NA	Harborne-2008-Tropical coastal habitats as sur.pdf	7	Europe	UK	UK	USA	USA	USA	USA	USA
560	Harding	2006	329	Harding-2006-Baseline data alysis as a tool.pdf	Baseline data alysis as a tool for predicting the conservation value of tropical coastal habitats in the Indo-Pacific	Baseline data analysis as a tool for predicting the conservation value of tropical coastal habitats in the Indo-Pacific	Coral Cay Conservation, a United Kingdom-based not-for-profit organization, operates using teams of international volunteers to conduct coral reef and tropical marine resource assessments in order to provide a baseline of data to facilitate marine resource management. This modus operandi provides the resources necessary to conduct a detailed study at minimal cost to the host country partners. Thi…	0	1	0	1	Pacific Islands	NA	Harding-2006-Baseline data analysis as a tool.pdf	3	Europe	UK	UK	UK
561	Hargreaves-Allen	2011	330	Hargreaves-Alle-2011-A global evaluation of co.pdf	A Global Evaluation of Coral Reef 5 Performance: Are MPAs Producing Conservation and Socio-Economic Improvements?	A global evaluation of coral reef management performance: Are MPAs producing conservation and socio-economic improvements?	There is a consensus that Marine Protected Area (MPA) performance needs regular evaluation against clear criteria, incorporating counterfactual comparisons of ecological and socio-economic performance. However, these evaluations are scarce at the global level. We compiled self-reports from managers and researchers of 78 coral reef-based MPAs world-wide, on the conservation and welfare improvement…	0	1	0	1	Non-specific	NA	Hargreaves-Alle-2011-A global evaluation of co.pdf	3	Europe	UK	UK	UK
566	Harry	2011	331	Harry-2011-Evaluating catch and mitigating ris.pdf	Evaluating catch and mitigating risk in a multispecies, tropical, inshore shark fishery within the Great Barrier Reef World Heritage Area	NA	Small-scale and artisanal fisheries for sharks exist in most inshore, tropical regions of the world. Although often important in terms of food security, their low value and inherent complexity provides an imposing hurdle to sustainable management. An observer survey of a small-scale commercial gill-net fishery operating within the Great Barrier Reef World Heritage area revealed at least 38 specie…	0	1	0	1	Australia and NZ	NA	Harry-2011-Evaluating catch and mitigating ris.pdf	8	Australia and NZ	Australia	Australia	Australia	Australia	Australia	Australia	Australia	Australia
569	Hassali	2013	332	Hassali-2013-tural_Resources_Forum.pdf	Towards sustaible tourism: The need to integrate conservation and development using the Buccoo Reef Marine Park, Tobago, West Indies	NA	In many countries of the Caribbean, tourism is a mainstay to economies. Semi-autonomous Tobagos Buccoo Reef Marine Park (BRMP) was established as one of the islands premier tourist attractions. However, the increasing and poorly regulated activity in the coastal zone that is taking place to complement the burgeoning tourism industry, threatens the ecological integrity of the Buccoo Reef. This p…	1	0	0	1	Caribbean	NA	Hassanali-2013-Natural_Resources_Forum.pdf	1	Caribbean	Trinidad & Tobago
573	Hawkins	2005	333	Hawkins-2005-Sustaibility of scuba diving to.pdf	Sustaibility of Scuba Diving Tourism on Coral Reefs of Saba	Sustainability of scuba diving tourism on coral reefs of Saba	We examine the effects of recreational scuba diving in the Saba Marine Park in the Netherlands Antilles over a nine-year period. Levels of diving have remained low whereas dive fees have provided a major source of income to this park. We studied 5 dive sites where the average number of dives per site per year ranged from 445 to 2,163. At each site we recorded benthic parameters and levels of dama…	0	0	1	1	Caribbean	NA	Hawkins-2005-Sustainability of scuba diving to.pdf	5	Europe	UK	UK	Netherlands Antilles	UK	USA
575	HAYNES	2000	334	Haynes-2000-Water quality in the Great Barrier.pdf	Water Quality in the Great Barrier Reef World Heritage Area: Past Perspectives, Current Issues and New Research Directions	NA	Elevated sediment and nutrient concentrations have long been regarded as the pre-eminent water quality threats to the Great Barrier Reef, with the potential risk posed by other pollutants such as heavy metals, persistent chloro- hydrocarbons, PCBs and petroleum related compounds considered to be of lesser consequence. However, the management focus on these latter types of pollutants has recently …	0	1	0	1	Australia and NZ	NA	Haynes-2000-Water quality in the Great Barrier.pdf	2	Australia and NZ	Australia	Australia
583	Herbeck	2011	335	Herbeck-2011-Typhoon-induced precipitation imp.pdf	Typhoon-induced precipitation impact on nutrient and suspended matter dymics of a tropical estuary affected by human activities in Hain, Chi	Typhoon-induced precipitation impact on nutrient and suspended matter dynamics of a tropical estuary affected by human activities in Hainan, China	Typhoons regularly hit the coasts along the northern South China Sea during summer monsoon. However, little is known on the effects of typhoon-related heavy precipitation on estuarine dynamics and coastal ecosystems. We analyzed physico-chemical characteristics, and concentrations and composition of dissolved and suspended matter in the Wenchang/Wenjiao Estuary (WWE) on the tropical island of Hai…	0	0	1	1	East Asia	NA	Herbeck-2011-Typhoon-induced precipitation imp.pdf	5	Europe	Germany	Germany	Germany	China	Germany
590	HEYMAN	1999	336	Heyman-1999-Hydrological and oceanographic con.pdf	Hydrological and Oceanographic Considerations for Integrated Coastal Zone 5 in Southern Belize	NA	The objectives of this study are to: (1) characterize the meteorology and hydrology of the Maya Mountain Marine Area Transect in southern Belize, (2) employ a simple water balance model to examine the discharge rates of seven watersheds to Port Honduras, (3) test the validity of the hydrological model, (4) explore the implications of potential landscape and hydrological alterations, and (5) exam…	0	0	1	1	Central America	NA	Heyman-1999-Hydrological and oceanographic con.pdf	2	Central America	Belize	USA
592	Higgins	2006	337	Higgins-2006-Phytoplankton distribution in the.pdf	Phytoplankton distribution in the Bismarck Sea north of Papua New Guinea: The effect of the Sepik River outflow	Phytoplankton distribution in the Bismarck Sea north of Papua New Guinea: The effect of the Sepik River outflow	Chlorophyll and carotenoid pigments were measured at stations in the Bismarck Sea north of Papua New Guinea and along the equator between 1431E and 1521E as part of the Tropical River Ocean Processes In Coastal Settings (TROPICS) programme in August 1997 and January/February 2000. Algal class abundances were estimated from these pigments using the CHEMTAX programme. The algal classes likely to be…	0	1	0	1	Pacific Islands	NA	Higgins-2006-Phytoplankton distribution in the.pdf	3	Australia and NZ	Australia	Australia	Australia
594	Hoagland	2013	338	Hoagland-2013-Supply-side approaches to the ec.pdf	Supply-side approaches to the economic valuation of coastal and marine habitat in the Red Sea	Supply-side approaches to the economic valuation of coastal and marine habitat in the Red Sea	The degradation of natural fish habitat in the ocean implies lost economic benefits. These value losses often are not measured or anticipated fully, and therefore they are mainly ignored in decisions to develop the coast for industrial or residential purposes. In such circumstances, the ocean habitat and its associated ecosystem are treated as if they are worthless. Measures of actual or potentia…	0	1	0	1	Southwest Asia	NA	Hoagland-2013-Supply-side approaches to the ec.pdf	3	North America	USA	USA	USA
595	Hoegh-Guldberg	2007	339	Hoegh-Guldberg-2007-Coral reefs under rapid cl.pdf	Coral Reefs Under Rapid Climate Change and Ocean Acidification	Coral reefs under rapid climate change and ocean acidification.	Atmospheric carbon dioxide concentration is expected to exceed 500 parts per million and global temperatures to rise by at least 2°C by 2050 to 2100, values that significantly exceed those of at least the past 420,000 years during which most extant marine organisms evolved. Under conditions expected in the 21st century, global warming and ocean acidification will compromise carbonate accretion, w…	0	0	1	1	Non-specific	NA	Hoegh-Guldberg-2007-Coral reefs under rapid cl.pdf	18	Australia and NZ	Australia	UK	USA	USA	USA	Australia	Philippines	USA	Canada	UK	USA	USA	USA	Mexico	USA	Australia	Tanzania	USA
596	HOEGH-GULDBERG	2014	340	Hoegh-Guldberg-2014-Coral reefs in the anthrop.pdf	Coral reefs in the Anthropocene: persistence or the end of the line?	NA	Tropical coastal ecosystems such as coral reefs have provided food, income and resources to humans for millennia. The first interactions that people had with coral reef ecosystems left little signature or impact, most probably due to the restricted access, as well as the challenges and ephemeral technologies that people used to exploit these important ecosystems. As human populations expanded alo…	1	0	0	1	Non-specific	NA	Hoegh-Guldberg-2014-Coral reefs in the anthrop.pdf	1	Australia and NZ	Australia
598	Hoetjes	2010	341	Hoetjes-2010-Saving Saba bank_ policy implicat.pdf	Saving Saba Bank: Policy Implications of Biodiversity Studies	Saving saba bank: Policy implications of biodiversity studies	Saba Bank has always been an area of special importance to the neighboring island of Saba in the Netherlands Antilles. Sabans traditionally fished on the Bank as far back as 1907, but increasing foreign fishing pressures on the Bank in the 1970s and 1980s forced many Saban fishermen out. Concerns were compounded by the suspicion that shipping was also damaging the benthic habitat of the bank. Fis…	0	0	1	1	Caribbean	NA	Hoetjes-2010-Saving Saba bank_ policy implicat.pdf	2	Europe	Netherlands Antilles	USA
601	Hoffmann	2002	342	Hoffmann-2002-Coral reef health and effects of.pdf	The Reimplementation of the Ra'ui: Coral Reef 5 in Rarotonga, Cook Islands	Coral reef health and effects of socio-economic factors in Fiji and Cook Islands	This research focuses on coral reef health in the South Pacific region, an area of high global coral diversity. Coral reef health surrounding four island case studies in the Cook Islands and Fiji have been assessed in areas that have not been previously surveyed. This study compares four islands with barrier and fringing reefs that have different levels of economic development, population pressur…	1	0	0	1	Pacific Islands	NA	Hoffmann-2002-Coral reef health and effects of.pdf	1	North America	USA
602	Hoffmann	2002	342	Hoffmann-2002-Coral reef health and effects of.pdf	The Reimplementation of the Ra'ui: Coral Reef 5 in Rarotonga, Cook Islands	The reimplementation of the Ra'ui: Coral reef management in Rarotonga, Cook Islands	This research focuses on coral reef health in the South Pacific region, an area of high global coral diversity. Coral reef health surrounding four island case studies in the Cook Islands and Fiji have been assessed in areas that have not been previously surveyed. This study compares four islands with barrier and fringing reefs that have different levels of economic development, population pressur…	1	0	0	1	Pacific Islands	NA	Hoffmann-2002-Coral reef health and effects of.pdf	1	North America	USA
599	Hoffmann	2002	343	Hoffmann-2002-The reimplementation of the Ra'1.pdf	Coral reef health and effects of socio-economic factors in Fiji and Cook Islands	Coral reef health and effects of socio-economic factors in Fiji and Cook Islands	This research focuses on coral reef health in the South Pacific region, an area of high global coral diversity. Coral reef health surrounding two study sites in Rarotonga, Cook Islands, has been assessed in areas that have not been previously surveyed. Each study site has distinct differences based upon marine management practices. Marine management practices are identified and described and some…	1	0	0	1	Pacific Islands	NA	Hoffmann-2002-The reimplementation of the Ra'1.pdf	1	North America	USA
600	Hoffmann	2002	343	Hoffmann-2002-The reimplementation of the Ra'1.pdf	Coral reef health and effects of socio-economic factors in Fiji and Cook Islands	The reimplementation of the Ra'ui: Coral reef management in Rarotonga, Cook Islands	This research focuses on coral reef health in the South Pacific region, an area of high global coral diversity. Coral reef health surrounding two study sites in Rarotonga, Cook Islands, has been assessed in areas that have not been previously surveyed. Each study site has distinct differences based upon marine management practices. Marine management practices are identified and described and some…	1	0	0	1	Pacific Islands	NA	Hoffmann-2002-The reimplementation of the Ra'1.pdf	1	North America	USA
603	Holbrook	2008	344	Holbrook-2008-Resistance and resilience of a c.pdf	Resistance and resilience of a coral reef fish community to changes in coral cover	Resistance and resilience of a coral reef fish community to changes in coral cover	Coral reefs are being degraded worldwide by perturbations that range from local disturbances to large-scale climate forcing. To gain insight into possible responses of the fish community to losses of live coral, we surveyed large plots that represented the range in cover of live coral in lagoons of Moorea, French Polynesia, to explore relationships between cover of live coral and 3 attributes of …	0	1	0	1	Pacific Islands	NA	Holbrook-2008-Resistance and resilience of a c.pdf	3	North America	USA	USA	USA
604	Holt	2011	345	Holt-2011-Development and testing of a coupled.pdf	Development and testing of a coupled ocean_atmosphere mesoscale ensemble prediction system	NA	A coupled oceanatmosphere mesoscale ensemble prediction system has been developed by the Naval Research Laboratory. This paper describes the components and implementation of the system and presents baseline results from coupled ensemble simulations for two tropical cyclones. The system is designed to take into account major sources of uncertainty in: (1) non-deterministic dynamics, (2) model err…	0	1	0	1	Caribbean	NA	Holt-2011-Development and testing of a coupled.pdf	7	North America	USA	USA	USA	USA	USA	USA	USA
605	Honda	2013	346	Honda-2013-Habitat use by fishes in coral reef.pdf	Habitat Use by Fishes in Coral Reefs, Seagrass Beds and Mangrove Habitats in the Philippines	Habitat Use by Fishes in Coral Reefs, Seagrass Beds and Mangrove Habitats in the Philippines	Understanding the interconnectivity of organisms among different habitats is a key requirement for generating effective management plans in coastal ecosystems, particularly when determining component habitat structures in marine protected areas. To elucidate the patterns of habitat use by fishes among coral, seagrass, and mangrove habitats, and between natural and transplanted mangroves, visual c…	0	0	1	1	Southeast Asia	NA	Honda-2013-Habitat use by fishes in coral reef.pdf	5	East Asia	Japan	Japan	Japan	Philippines	Philippines
607	Hossain	2001	347	Hossain-2001-Biological aspects of the coastal.pdf	Biological aspects of the coastal and marine environment of Bangladesh	Biological aspects of the coastal and marine environment of Bangladesh	Bangladesh, which has a warm tropical climate and abundant annual rainfall, has very rich coastal waters; these support diverse and abundant marine life.The coastal and marine environment is becoming increasingly important in fulfilling social, economic, development and strategic objectives of the country.The biological character is briefly reviewed to provide a background to the main habitats an…	1	0	0	1	Southwest Asia	NA	Hossain-2001-Biological aspects of the coastal.pdf	1	Southeast Asia	Thailand
609	Houk	2008	348	Houk-2008-Dymics of shallow-water assemblage.pdf	Dymics of shallow-water assemblages in the Saipan Lagoon	Dynamics of shallow-water assemblages in the Saipan Lagoon	The Saipan Lagoon (Northern Mariana Islands) was first examined for benthic composition and habitat distribution in the late 1940s. Here, we employ a 4-stage approach to evaluate and explain change in the distribution of the 9 habitats previously demarcated. We show that there have been considerable reductions in seagrass, staghorn Acropora, and Acropora palifera dominated habitats (3.72, 1.26,…	0	1	0	1	Pacific Islands	NA	Houk-2008-Dynamics of shallow-water assemblage.pdf	2	North America	USA	USA
611	Huang	2003	349	Huang-2003-The status of the ecological enviro.pdf	The status of the ecological environment and a proposed protection strategy in Sanya Bay, Hain Island, Chi	NA	Sanya Bay encompasses a high diversity of natural habitats, ranging from coral reefs, rocky and sandy shores and mudflats to mangroves. Seasonal physicochemical and biological investigations were conducted from 1998 to 1999 and again in April 2000. Water-related environmental quality in Sanya Bay is in good condition. The levels of dissolved oxygen, nitrogen, phosphorus and heavy metals are withi…	0	1	0	1	East Asia	NA	Huang-2003-The status of the ecological enviro.pdf	8	East Asia	China	China	China	China	China	China	China	China
614	HUGHES	2012	350	Hughes-2013-The Wicked Problem of Chi's Disa.pdf	The Wicked Problem of Chis Disappearing Coral Reefs	NA	We examined the development of coral reef science and the policies, institutions, and governance frameworks for management of coral reefs in China in order to highlight the wicked problem of preserving reefs while simultaneously promoting human development and nation building. China and other sovereign states in the region are experiencing unprecedented economic expansion, rapid population growth…	0	1	0	1	East Asia	NA	Hughes-2013-The Wicked Problem of China's Disa.pdf	3	Australia and NZ	Australia	Australia	Australia
615	Hunt	2013	351	Hunt-2013-The Green Fins approach for monitori.pdf	The Green Fins approach for monitoring and promoting environmentally sustaible scuba diving operations in South East Asia	The Green Fins approach for monitoring and promoting environmentally sustainable scuba diving operations in South East Asia	An expansion of coral reef tourism around the world has resulted in growing concern about the associated environmental impacts. Coral reefs, and other coastal habitats, are threatened by a variety of direct and indirect impacts caused by irresponsible snorkelling and scuba diving practices. Green Fins is a conservation initiative that works with dive centres to promote a set of standards for envi…	0	0	1	1	Southeast Asia	NA	Hunt-2013-The Green Fins approach for monitori.pdf	5	Europe	UK	UK	UK	UK	Thailand
616	Hurrey	2013	352	Hurrey-2013-Macroalgal species richness and as.pdf	Macroalgal species richness and assemblage composition of the Great Barrier Reef seabed	Macroalgal species richness and assemblage composition of the Great Barrier Reef seabed	Understanding the drivers of broad-scale patterns of biodiversity is an overarching goal in ecology. We analysed environmental drivers of macroalgal species richness and composition on the continental shelf seabed of Australias Great Barrier Reef (GBR), and mapped these patterns to show phycologically diverse and depauperate areas. Although shelf seabed habitats constitute ~61% of the GBR Marine…	0	1	0	1	Australia and NZ	NA	Hurrey-2013-Macroalgal species richness and as.pdf	4	Australia and NZ	Australia	Australia	Australia	Australia
620	INGLIS	1999	353	Inglis-1999-Crowding norms in marine settings_.pdf	Crowding Norms in Marine Settings: A Case Study of Snorkeling on the Great Barrier Reef	NA	Research on crowding in natural environments has traditionally been concerned with encounters in terrestrial settings. Increased visitation to tropical marine environments, however, has meant that evaluations of aesthetic quality are increasingly becoming issues for managers of marine parks. In this study, we used image-capture techniques to develop a series of above- and below-water images depic…	0	1	0	1	Australia and NZ	NA	Inglis-1999-Crowding norms in marine settings_.pdf	3	Australia and NZ	Australia	Australia	Australia
621	Islam	2011	354	Islam-2011-Social ecological alysis of an ou.pdf	Social Ecological Alysis of an Outbreak of Pufferfish Egg Poisoning in a Coastal Area of Bangladesh	Social ecological analysis of an outbreak of pufferfish egg poisoning in a coastal area of Bangladesh	Recurrent outbreaks of marine pufferfish poisoning in Bangladesh highlight the need to understand the context in which the outbreaks occurred. In a recent outbreak investigation, a multidisciplinary team conducted a mixedmethod study to identify the demography and clinical manifestation of the victims and to explore different uses of pufferfish, and local buying, selling, and processing practices…	0	1	0	1	Southwest Asia	NA	Islam-2011-Social ecological analysis of an ou.pdf	10	Southwest Asia	Bangladesh	Bangladesh	Bangladesh	Bangladesh	Bangladesh	Bangladesh	Bangladesh	Bangladesh	Bangladesh	Bangladesh
623	Jackson	1989	355	Jackson-1989-Ecological effects of a major oil.pdf	Ecological Effects of a Major Oil Spill on Pamanian Coastal Marine Communities	Ecological effects of a major oil spill on Panamanian coastal marine communities	OIL POLLUTION IN THE SEA HAS BEEN A MAJOR ENVIRONmental problem foir scevral decades, but we know remarkably little about the effccts of oil on natural populations and communities (1). Uptake of oil and physiological responses of organisms havc been investigated in the laboratory or field, sometimes coupled with short-term monitoring of communities and of amounts of oil in water, sediments, and o…	0	0	1	1	Central America	NA	Jackson-1989-Ecological effects of a major oil.pdf	18	Central America	Panama	Panama	Panama	Panama	Bermuda	Panama	USA	Panama	USA	Panama	Panama	Panama	Bermuda	Panama	Panama	USA	Panama	USA
625	Jaleel	2013	356	Jaleel-2013-The status of the coral reefs and.pdf	The status of the coral reefs and the magement approaches: The case of the Maldives	The status of the coral reefs and the management approaches: Thecase of the Maldives	The islands of the Maldives are very low lying with an average of about a metre above mean high tide. Consequently, climate change and associated sea-level rise, is a very real threat faced by the people of Maldives and it may well be one of the most vulnerable in the whole world. For the Maldives, where the whole population practically lives on reefs, it would not be erred in stating that their …	1	0	0	1	Southwest Asia	NA	Jaleel-2013-The status of the coral reefs and.pdf	1	Europe	UK
628	Jarernpornnipat	2003	357	Jarernpornnipat-2003-Sustaible magement of.pdf	Sustaible magement of shellfish resources in Bandon Bay, Gulf of Thailand	Sustainable management of shellfish resources in Bandon Bay, Gulf of Thailand	Bandon Bay (Surat Thani Province) is one of the most productive coastal areas in southern Thailand. The Tapi River and 18 channels are the main sources of freshwater, nutrients, organic matter and sediment to the bay and the loading of freshwater and nutrients provide essential support for the production of phytoplankton in the estuarine ecosystem. Bandon Bay is important as natural spawning, nur…	0	0	1	1	Southeast Asia	NA	Jarernpornnipat-2003-Sustainable management of.pdf	6	Southeast Asia	Thailand	Thailand	Denmark	Thailand	Thailand	Thailand
629	Jayalakshmy	2009	358	Jayalakshmy-2009-Effect of water quality param.pdf	Effect of water quality parameters on the distribution of Pleuromamma (Copepoda_Calanoida) species in the Indian Ocean: a statistical approach	Effect of water quality parameters on the distribution of Pleuromamma (Copepoda- Calanoida) species in the Indian Ocean: A statistical approach	The region between 10? N and 10? S latitude was known to be congenial for distribution of Pleuromamma species. Diel and ontogenetic migrations were observed for Pleuromamma xiphias. Multivariate analyses such as factor analysis on species abundance and predictive step-up multiple regression models of water quality parameters: temperature, salinity, dissolved oxygen and their first order interact…	0	1	0	1	Southwest Asia	NA	Jayalakshmy-2009-Effect of water quality param.pdf	3	Southwest Asia	India	India	India
630	Jeanson	2014	359	Jeanson-2014-A GIS-based coastal monitoring an.pdf	A GIS-based coastal monitoring and surveillance observatory on tropical islands exposed to climate change and extreme events: the example of Mayotte Island, Indian Ocean	A GIS-based coastal monitoring and surveillance observatory on tropical islands exposed to climate change and extreme events: the example of Mayotte Island, Indian Ocean	The global change currently observed is deemed to generate accelerated coastal erosion and an increase in frequency and intensity of extreme weather events. Populated tropical island coasts are particularly vulnerable. Awareness of this vulnerability has prompted recourse to the construction of operational observatories on the coastal dynamics of several French tropical islands, including Mayotte…	0	1	0	1	Pacific Islands	NA	Jeanson-2014-A GIS-based coastal monitoring an.pdf	3	Europe	France	France	France
46	Ak_-Castillo	2011	360	jeb2011v32i4p395.pdf	2 dymics of Trichodesmium erythraeum (Cyanophyta) in the tiol Park ÐSistema Arrecifal VeracruzanoÓ in the Gulf of Mexico	NA	Trichodesmium erythraeum Ehrenberg ex Gomont is a microalga worldwide distributed in tropical seas. This filamentous microalga was detected in phytoplankton samples collected in the Protected Natural Area Parque Nacional Sistema Arrecifal Veracruzano, and because of its ecological importance, its temporal dynamics was studied using net samples (30 Cm) collected in one year period. Samples were …	1	0	0	1	Central America	NA	jeb2011v32i4p395.pdf	1	Central America	Mexico
632	Jegatheesan	2007	361	Jegatheesan-2007-Technological advances in aqu.pdf	Technological advances in aquaculture farms for minimal effluent discharge to oceans	Technological advances in aquaculture farms for minimal effluent discharge to oceans	Aquaculture is an expanding, high value primary industry in many countries including Australia. At the same time, the environmental sustainability of aquaculture is attracting increasing attention, especially in Australia. One of the major environmental issues facing aquaculture in the 21st century is the management of discharge of nutrient-rich waters from land-based aquaculture systems into coa…	0	1	0	1	Australia and NZ	NA	Jegatheesan-2007-Technological advances in aqu.pdf	5	Australia and NZ	Australia	Australia	Australia	Australia	Australia
817	McClahan	1997	362	JEMBE1997sediment.pdf	The effects of traditiol fisheries magement on fisheries yields and the coral-reef ecosystems of southern Kenya	NA	Since the early 1960s increased soil erosion due to changing land-use practices in the Sabaki River catchment basin, has increased river-sediment discharge into coastal waters around Malindi, Kenya. Line transect surveys of shallow ( < 5 m at low tide) coral reef communities were conducted in 1985-1988 and 1992-1993 on a gradient of sediment influence in the Watamu (low influence) and Malindi (in…	0	0	1	1	Eastern Africa	NA	JEMBE1997sediment.pdf	2	East Africa	Kenya	USA
633	Jennerjahn	2012	363	Jennerjahn-2012-Biogeochemical response of tro.pdf	Biogeochemical response of tropical coastal systems to present and past environmental change	Biogeochemical response of tropical coastal systems to present and past environmental change	Global climate and environmental change affect the biogeochemistry and ecology of aquatic systems mostly due to a combination of natural and anthropogenic factors. The latter became more and more important during the past few thousand years and particularly during the Anthropocene. However, although they are considered important in this respect as yet much less is known from tropical than from …	1	0	0	1	Non-specific	NA	Jennerjahn-2012-Biogeochemical response of tro.pdf	1	Europe	Germany
637	Jimenez	2012	364	Jimenez-2012-Predicting invertebrate assemblag.pdf	Predicting invertebrate assemblage composition from harvesting pressure and environmental characteristics on tropical reef flats	Predicting invertebrate assemblage composition from harvesting pressure and environmental characteristics on tropical reef flats	Invertebrates represent an essential component of coral reef ecosystems; they are ecologically important and a major resource, but their assemblages remain largely unknown, particularly on Pacific islands. Understanding their distribution and building predictive models of community composition as a function of environmental variables therefore constitutes a key issue for resource management. The …	0	0	1	1	Pacific Islands	NA	Jimenez-2012-Predicting invertebrate assemblag.pdf	4	Pacific Islands	New Caledonia	Vanuatu	France	France
645	Jollit	2010	365	Jollit-2010-Geographical aspects of informal r.pdf	Geographical aspects of informal reef fishery systems in New Caledonia	Geographical aspects of informal reef fishery systems in New Caledonia	The coral reefs in New Caledonia have long been used by the local population for subsistence as well as commercial and recreational purposes. The impact of informal fisheries on reef ecosystems illustrated the idiosyncrasies of New Caledonian fisheries in the southwest Pacific. This paper compared informal fishery systems on the southwest coast (close to the capital and economic center of the cou…	0	1	0	1	Pacific Islands	NA	Jollit-2010-Geographical aspects of informal r.pdf	7	Pacific Islands	New Caledonia	New Caledonia	New Caledonia	France	France	New Caledonia	France
646	Jones	2007	366	Jones-2007-Chemical contamition of a coral r.pdf	Chemical contamition of a coral reef by the grounding of a cruise ship in Bermuda	Chemical contamination of a coral reef by the grounding of a cruise ship in Bermuda	Bulk metal analyses of surficial sediments collected around the Norwegian Crown cruise ship grounding site in Bermuda indicated significant but localized contamination of reef sediments by copper and zinc, caused by the stripping of the tri-butyltin (TBT)-free antifouling (AF) paint (Intersmooth 460) from the underside of the hull. Highest copper and zinc values were found in heavily compacted an…	1	0	0	1	Caribbean	NA	Jones-2007-Chemical contamination of a coral r.pdf	1	Caribbean	Bermuda
647	Jones	2011	367	Jones-2011-Species richness and community stru.pdf	Species Richness and Community Structure on a High Latitude Reef: Implications for Conservation and 5	Species richness and community structure on a high latitude reef: Implications for conservation and management	In spite of the wealth of research on the Great Barrier Reef, few detailed biodiversity assessments of its inshore coral communities have been conducted. Effective conservation and management of marine ecosystems begins with fine-scale biophysical assessments focused on diversity and the architectural species that build the structural framework of the reef. In this study, we investigate key coral…	0	1	0	1	Australia and NZ	NA	Jones-2011-Species richness and community stru.pdf	3	Australia and NZ	Australia	Australia	Australia
648	Jones	2014	368	Jones-2014-Biophysical characteristics of a mo.pdf	Biophysical characteristics of a morphologically-complex macrotidal tropical coastal system during a dry season	Fine-scale hydrodynamics influence the spatio-temporal distribution of harbour porpoises at a coastal hotspot	Four boat-based surveys and several moored measurements were conducted over the dry season in June, July, August and September 2008 in the central Kimberley region of northwestern Australia; a macrotidal tropical coastal region, characterised by numerous island archipelagos and shallow reefs. The objective was to determine the influence of this complex morphology on the biophysical properties of …	0	1	0	1	Australia and NZ	NA	Jones-2014-Biophysical characteristics of a mo.pdf	6	Australia and NZ	Australia	Australia	Australia	Australia	Australia	Australia
649	Jones	2014	368	Jones-2014-Biophysical characteristics of a mo.pdf	Biophysical characteristics of a morphologically-complex macrotidal tropical coastal system during a dry season	Biophysical characteristics of a morphologically-complex macrotidal tropical coastal system during a dry season	Four boat-based surveys and several moored measurements were conducted over the dry season in June, July, August and September 2008 in the central Kimberley region of northwestern Australia; a macrotidal tropical coastal region, characterised by numerous island archipelagos and shallow reefs. The objective was to determine the influence of this complex morphology on the biophysical properties of …	0	1	0	1	Australia and NZ	NA	Jones-2014-Biophysical characteristics of a mo.pdf	6	Australia and NZ	Australia	Australia	Australia	Australia	Australia	Australia
370	Donner	2009	369	jourl.pone.0005712.pdf	Coping with Commitment: Projected Thermal Stress on Coral Reefs under Different Future Scerios	Coping with commitment: Projected thermal stress on coral reefs under different future scenarios	Background: Periods of anomalously warm ocean temperatures can lead to mass coral bleaching. Past studies have concluded that anthropogenic climate change may rapidly increase the frequency of these thermal stress events, leading to declines in coral cover, shifts in the composition of corals and other reef-dwelling organisms, and stress on the human populations who depend on coral reef ecosystem…	1	0	0	1	Non-specific	NA	journal.pone.0005712.pdf	1	North America	Canada
519	Grech	2011	370	jourl.pone.0021094.pdf	Interactions between a Trawl Fishery and 1 Closures for Biodiversity Conservation in the Great Barrier Reef World Heritage Area, Australia	Interactions between a trawl fishery and spatial closures for biodiversity conservation in the Great Barrier reef World Heritage Area, Australia	Background: The Queensland East Coast Otter Trawl Fishery (ECOTF) for penaeid shrimp fishes within Australias Great Barrier Reef World Heritage Area (GBRWHA). The past decade has seen the implementation of conservation and fisheries management strategies to reduce the impact of the ECOTF on the seabed and improve biodiversity conservation. New information from electronic vessel location monitori…	0	1	0	1	Australia and NZ	NA	journal.pone.0021094.pdf	2	Australia and NZ	Australia	Australia
520	Grech	2011	370	jourl.pone.0021094.pdf	Interactions between a Trawl Fishery and 1 Closures for Biodiversity Conservation in the Great Barrier Reef World Heritage Area, Australia	A broad-scale assessment of the risk to coastal seagrasses from cumulative threats	Background: The Queensland East Coast Otter Trawl Fishery (ECOTF) for penaeid shrimp fishes within Australias Great Barrier Reef World Heritage Area (GBRWHA). The past decade has seen the implementation of conservation and fisheries management strategies to reduce the impact of the ECOTF on the seabed and improve biodiversity conservation. New information from electronic vessel location monitori…	0	1	0	1	Australia and NZ	NA	journal.pone.0021094.pdf	2	Australia and NZ	Australia	Australia
657	Juhasz	2010	371	Juhasz-2010-Does use of tropical beaches by to.pdf	Does use of tropical beaches by tourists and island residents result in damage to fringing coral reefs? A case study in Moorea French Pacific Islands	Does use of tropical beaches by tourists and island residents result in damage to fringing coral reefs? A case study in Moorea French Polynesia	Although coral reefs worldwide are subject to increasing global threats, humans also impact coral reefs directly through localized activities such as snorkeling, kayaking and fishing. We investigated five sites on the northern shore of Moorea, French Polynesia, and quantified the number of visitors on the beach and in shallow water. In field surveys, we measured total coral cover and colony sizes…	0	1	0	1	Pacific Islands	NA	Juhasz-2010-Does use of tropical beaches by to.pdf	4	North America	USA	USA	USA	USA
665	Kamukuru	2004	372	Kamukuru-2004-Evaluating a marine protected ar.pdf	Evaluating a marine protected area in a developing country: Mafia Island Marine Park, Tanzania	NA	The benefits of marine protected areas (MPAs) to fish productivity remain debated, and comprehensive research projects have been suggested to assess MPA function. This study evaluated MPA performance in a developing country in the context of local needs. We compared density and size of the blackspot snapper, Lutjanus fulviflamma (Forsska? l 1775), in Mafia Island Marine Park (MIMP), Tanzania, wit…	0	0	1	1	Eastern Africa	NA	Kamukuru-2004-Evaluating a marine protected ar.pdf	3	East Africa	Tanzania	Tanzania	Sweden
667	Kaplan	2014	373	Kaplan-2014-Applying complementary species vul.pdf	Applying complementary species vulnerability assessments to improve conservation strategies in the Galapagos Marine Reserve	Applying complementary species vulnerability assessments to improve conservation strategies in the Galapagos Marine Reserve	Marine biodiversity can be protected by identifying vulnerable species and creating marine protected areas (MPAs) to ensure their survival. A wide variety of methods are employed by environmental managers to determine areas of conservation priority, however which methods should be applied is often a subject of debate for practitioners and scientists. We applied two species vulnerability assessmen…	0	0	1	1	South America	NA	Kaplan-2014-Applying complementary species vul.pdf	6	South America	Ecuador	Spain	Ecuador	USA	Ecuador	Ecuador
669	Kehrig	2013	374	Kehrig-2013-Mercury and selenium biomagnificat.pdf	Mercury and selenium biomagnification in a Brazilian coastal food web using nitrogen stable isotope alysis: A case study in an area under the influence of the Paraiba do Sul River plume	Mercury and selenium biomagnification in a Brazilian coastal food web using nitrogen stable isotope analysis: A case study in an area under the influence of the Paraiba do Sul River plume	Mercury (Hg), selenium (Se) and nitrogen (d15N) stable isotope were assessed in a tropical food web of Rio de Janeiros north coast. Isotopic data on muscle suggest a difference related to this parameter along the food web; where top-predators (cetacean and voracious fish) displayed heavier d15N over the entire food web. Both top-predators presented similar d15N values. Cetacean displayed higher …	0	1	0	1	South America	NA	Kehrig-2013-Mercury and selenium biomagnificat.pdf	5	South America	Brazil	Brazil	Brazil	Brazil	Brazil
670	Kench	2006	375	Kench-2006-Wave processes on coral reef flats2.pdf	Wave Processes on Coral Reef Flats: Implications for Reef Geomorphology Using Australian Case Studies	Wave processes on coral reef flats: Implications for reef geomorphology using Australian case studies	Australian reef flats on the Cocos (Keeling) Islands atoll, Indian Ocean; Warraber Reef, Torres Strait; and Lady Elliot Island, Great Barrier Reef vary greatly in morphology (width, elevation) and hydrodynamic setting (wave and tidal regime). This study describes results from detailed wave and current measurements, under nonstorm conditions, along five reef flat transects on these reef systems an…	0	0	1	1	Australia and NZ	NA	Kench-2006-Wave processes on coral reef flats2.pdf	2	Australia and NZ	New Zealand	Australia
683	Kirkman	2006	376	Kirkman-2006-The east Asian seas UNEP regiol.pdf	The East Asian Seas UNEP Regiol Seas Programme	The east Asian seas UNEP regional seas programme	In East Asia, the Action Plan of the Coordinating Body of the Seas of East Asia (COBSEA) aims to protect the marine and coastal environment. COBSEA is funded by member countries and UNEP, member countries discuss common problems and resolve and diagnose cross-boundary degradation of marine environments. Success has come from funding for coral reef community activities and the Global Environment F…	1	0	0	1	Southeast Asia	NA	Kirkman-2006-The east Asian seas UNEP regional.pdf	1	Australia and NZ	Australia
684	Kiszka	2007	377	Kiszka-2007-Atypical associations between dugo.pdf	Atypical associations between dugongs (Dugong dugon) and dolphins in a tropical lagoon	Atypical associations between dugongs (Dugong dugon) and dolphins in a tropical lagoon	Several types of relationships link organisms to each other, including competition, predation and various types of associations. This paper presents the first case of association/interaction between dugongs, Dugong dugon , the only strictly marine herbivorous mammal, and three species of tropical dolphins in and around the lagoon of Mayotte (45°10'E 12°50'S), in the western tropical Indian ocean.…	1	0	0	1	Eastern Africa	NA	Kiszka-2007-Atypical associations between dugo.pdf	1	Europe	France
685	Klemas	2011	378	Klemas-2011-Beach Profiling and LIDAR Bathymet.pdf	Beach Profiling and LIDAR Bathymetry: An Overview with Case Studies	Beach profiling and LIDAR bathymetry: An overview with case studies	Light detection and ranging (LIDAR) techniques, combined with Global Positioning Systems (GPSs), make it possible to obtain accurate topographical and bathymetric maps, including maps of shoreline positions. LIDAR surveys can produce 10- to 15-cm vertical accuracy at a spatial resolution greater than one elevation measurement per square meter. This meets the requirements of many coastal research …	1	0	0	1	Australia and NZ	NA	Klemas-2011-Beach Profiling and LIDAR Bathymet.pdf	1	North America	USA
690	Koike	1987	379	Koike-1987-The role of the sea urchin, Tripneu.pdf	The Role of Sea urchin, Tripneustes gratilla (Lineus), in Decomposition and Nutrient Cycling in a Tropical Seagrass Bed	The role of the sea urchin, Tripneustes gratilla (Linnaeus), in decomposition and nutrient cycling in a tropical seagrass bed	The sea urchin, Tripneustes gratillal which feeds mainly on living leaves of the seagrass, Thalassia hemprichii, was studied in its habitat on the southern coast of Papua New Guinea, and its roles in decomposition and nutrient cycling in a seagrass bed were assessed through the excretion of ammonium and metabolism of feces produced by the sea urchin. Carbon content of the fresh feces (21 ~ of dry…	0	1	0	1	Pacific Islands	NA	Koike-1987-The role of the sea urchin	3	East Asia	Japan	Japan	Japan
691	Kok	2011	380	Kok-Growth and physiological responses of the.pdf	Growth and Physiological Responses of the Singapore Strain of Heterosigma to Various Nitrogen Sources and Light Conditions	NA	Nutrient pollution of coastal environments particularly by nitrogen (N) sources can lead to harmful algal blooms. Ameliorating the incidence of such events requires an understanding of how harmful taxa respond to different N sources. In particular, the blooms of toxic Heterosigma have been known to cause costly and highly detrimental effects to surrounding ecosystem function. The threat is especi…	0	1	0	1	Southeast Asia	NA	Kok-Growth and physiological responses of the.pdf	2	Southeast Asia	Singapore	Singapore
692	KOLM	2003	381	Kolm-2003-Wild populations of a reef fish suff.pdf	Wild Populations of a Reef Fish Suffer from the ÐNondestructiveÓ Aquarium Trade Fishery	NA	The commercial fishery for coral reef fish for the aquarium trade has begun to change, at least in some parts of the world, from destructive methods such as cyanide and dynamite fishing to less-destructive methods such as hand-net fishing. However, data on the effects on wild populations of such relatively nondestructive methods is nonexistent. The Banggai cardinalfish ( Pterapogon kauderni ) is …	0	1	0	1	Southeast Asia	NA	Kolm-2003-Wild populations of a reef fish suff.pdf	2	Europe	Sweden	Sweden
694	Kovacs	2009	382	Kovacs-2009-Evaluating the condition of a mang.pdf	Evaluating the condition of a mangrove forest of the Mexican Pacific based on an estimated leaf area index mapping approach	Evaluating the condition of a mangrove forest of the Mexican Pacific based on an estimated leaf area index mapping approach	Given the alarming global rates of mangrove forest loss it is important that resource managers have access to updated information regarding both the extent and condition of their mangrove forests. Mexican mangroves in particular have been identified as experiencing an exceptional high annual rate of loss. However, conflicting studies, using remote sensing techniques, of the current state of many …	0	1	0	1	Central America	NA	Kovacs-2009-Evaluating the condition of a mang.pdf	4	North America	Canada	Canada	Mexico	Mexico
695	Kozlowsky-Suzuki	2004	383	Kozlowsky-Suzuk-2004-Resilience of a zooplankt.pdf	Resilience of a zooplankton community subjected to marine intrusion in a tropical coastal lagoon	Resilience of a zooplankton community subjected to marine intrusion in a tropical coastal lagoon	One of the main disturbances on Imboassica Lagoon is the occasional artificial opening of its sand bar. Following two such events, two environmental gradients were observed. One was directly related to entry of marine water (salinity gradient); and the other to a decrease in dilution of the nutrient load, because of water level reduction (trophic status gradient). Two stations were sampled. At St…	0	1	0	1	South America	NA	Kozlowsky-Suzuk-2004-Resilience of a zooplankt.pdf	2	South America	Brazil	Brazil
696	Krieger	2012	384	Krieger-2012-Giant Robber Crabs Monitored from.pdf	Giant Robber Crabs Monitored from Space: GPS-Based Telemetric Studies on Christmas Island (Indian Ocean)	Giant Robber Crabs Monitored from Space: GPS-Based Telemetric Studies on Christmas Island (Indian Ocean)	We investigated the navigational capabilities of the worlds largest land-living arthropod, the giant robber crab Birgus latro (Anomura, Coenobitidae); this crab reaches 4 kg in weight and can reach an age of up to 60 years. Populations are distributed over small Indo-Pacific islands of the tropics, including Christmas Island (Indian Ocean). Although this species has served as a crustacean model …	0	1	0	1	Australia and NZ	NA	Krieger-2012-Giant Robber Crabs Monitored from.pdf	7	Europe	Germany	Germany	Germany	Germany	Germany	Germany	Germany
697	Kroon	2009	385	Kroon-2009-Catchment magement and health of.pdf	Catchment magement and health of coastal ecosystems: synthesis and future research	Catchment management and health of coastal ecosystems: Synthesis and future research	Globally, many coastal ecosystems are threatened by a decline in water quality from land-based runoff. However, dynamic and complex biophysical and socioeconomic interdependencies often hamper the reversal of this decline in water quality. This Special Issue illustrates an integrated approach to address deteriorating water quality from land-based runoff in the Tully basin to the Great Barrier Ree…	0	1	0	1	Australia and NZ	NA	Kroon-2009-Catchment management and health of.pdf	2	Australia and NZ	Australia	Australia
698	Kroon	2012	386	Kroon-2012-Towards ecologically relevant targe.pdf	Towards ecologically relevant targets for river pollutant loads to the Great Barrier Reef	Towards ecologically relevant targets for river pollutant loads to the Great Barrier Reef	Degradation of coastal ecosystems in the Great Barrier Reef (GBR), Australia, has been linked with a decline in water quality from land-based runoff. This paper examines the reduction in current end-ofcatchment loads required for total suspended solids (TSS) and dissolved inorganic nitrogen (DIN) to achieve GBR water quality guidelines. Based on first-order estimates of sustainable pollutant load…	1	0	0	1	Australia and NZ	NA	Kroon-2012-Towards ecologically relevant targe.pdf	1	Australia and NZ	Australia
702	Ku	2013	387	Ku-2013-A conceptual process-based reference m.pdf	A conceptualprocess-basedreferencemodelforcollaborativelymaging recreatiol scubadivinginKentingtiolPark	A conceptual process-based reference model for collaboratively managing recreational scuba diving in Kenting National Park	The purpose of this paper is to describe a management process to better control scuba diving on coral reefs. While the dive industry permits growth in local tourism revenues it can also create a degradation of the coral reefs if there are too many divers. Consequently appropriate management is essential. In this study, a case analysis of Kenting National Park was undertaken. The authors describe …	0	1	0	1	East Asia	NA	Ku-2013-A conceptual process-based reference m.pdf	2	East Asia	Taiwan	Taiwan
663	KæHLMANN	2002	388	KuÌhlmann-2002-Evaluations of marine reserves a.pdf	Evaluations of marine reserves as basis to develop altertive livelihoods in coastal areas of the Philippines	NA	The 11 marine reserves along the Leyte Gulf, Eastern Samar, Philippines were quantified in terms of reef slope composition, hard coral coverage and standing fish biomass by manta tow and transect dive survey from 1998 to 1999. Based on the assessed ecological conditions (Condition Index, CI; Coral Coverage Index, CCI; Reef Condition Index, RCI; Fish Biomass) and derived ranking, suitable small-sc…	1	0	0	1	Southeast Asia	NA	Ku?hlmann-2002-Evaluations of marine reserves a.pdf	1	Southeast Asia	Philippines
703	Kularatne	2014	389	Kularatne-2014-Suitability of the coastal wate.pdf	Suitability of the coastal waters of Sri Lanka for offshore sand mining: a case study on environmental considerations	Suitability of the coastal waters of Sri Lanka for offshore sand mining: A case study on environmental considerations	In Sri Lanka, the total demand for sand is about 12,000,000 m3 per year with a demand growth projected to increase by 10 % every year. However, Sri Lankas construction industry seems to face a shortage of sand if offshore sand mining is not promoted as a viable alternative and over-exploitation of river sand may lead to more significant damage to rivers (which is presently a serious issue). This…	1	0	0	1	Southwest Asia	NA	Kularatne-2014-Suitability of the coastal wate.pdf	1	Southwest Asia	Sri Lanka
704	Kulbicki	2007	390	Kulbicki-2007-Opening of an MPA to fishing_ .pdf	Opening of an MPA to fishing: tural variations in the structure of a coral reef fish assemblage obscure changes due to fishing	Opening of an MPA to fishing: Natural variations in the structure of a coral reef fish assemblage obscure changes due to fishing	Marine Protected Areas (MPAs) are known to enhance diversity, density and biomass of coral reef fishes and to modify the size and trophic structures of these fish assemblages. Opening to fishing has the opposite effects, but on a much shorter time scale. The present study compares the evolution of the fish assemblages of two adjacent reef zones, both initially MPAs, one of them being afterwards o…	0	0	1	1	Pacific Islands	NA	Kulbicki-2007-Opening of an MPA to fishing_ Na.pdf	7	Europe	France	New Caledonia	France	New Caledonia	New Caledonia	New Caledonia	New Caledonia
705	Kull	2007	391	Kull-2007-Tropical Forest Transitions and Glob.pdf	Tropical Forest Transitions and Globalization: Neo-Liberalism, Migration, Tourism, and Intertiol Conservation Agendas	Tropical forest transitions and globalization: Neo-liberalism, migration, tourism, and international conservation agendas	Deforestation is giving way to forest regeneration in some tropical regions. We investigate such forest transitions in two biodiversity-rich countries. A case study near the Pacific Coast of Costa Rica shows how synergies between international conservation ideologies, neo-liberal reforms, tourism (and associated real estate investment), and migration (as one strategy for livelihood diversific…	0	0	1	1	Non-specific	NA	Kull-2007-Tropical Forest Transitions and Glob.pdf	3	Australia and NZ	Australia	Canada	Canada
707	Kunte	2014	392	Kunte-2014-Multi-hazards coastal vulnerability.pdf	Multi-hazards coastal vulnerability assessment of Goa, India, using geospatial techniques	Multi-hazards coastal vulnerability assessment of Goa, India, using geospatial techniques	The state of Goa in West India has a 105 km long coastline with beaches and cultural heritage sites of significant importance to tourism. The increasing incidence of tropical cyclones in the Arabian Sea in recent decades and the devastating impacts of the December 2004 tsunami in India stressed the importance of assessing the vulnerability of coastal areas to flooding and inundation, notably in v…	0	0	1	1	Southwest Asia	NA	Kunte-2014-Multi-hazards coastal vulnerability.pdf	6	Southwest Asia	India	India	India	India	UK	UK
710	Kuster	2005	393	Kuster-2005-Long-term trends in subsistence fi.pdf	Long-term trends in subsistence fishing patterns and coral reef fisheries yield from a remote Fijian island	Long-term trends in subsistence fishing patterns and coral reef fisheries yield from a remote Fijian island	Household and seafood consumption surveys were conducted on the Fijian island of Ono-i-Lau to examine changes in subsistence fishing patterns and the quantity and composition of yield from the fishery, over a 20-year period from 1982 to 2002. It was found that the transition from traditional outrigger canoes to outboard-powered vessels has caused a dramatic increase in catch rate. This has result…	0	0	1	1	Pacific Islands	NA	Kuster-2005-Long-term trends in subsistence fi.pdf	3	Australia and NZ	Australia	USA	Fiji
712	Lacerda	2014	394	Lacerda-2014-Temporal patterns in the intertid.pdf	2 patterns in the intertidal faul community at the mouth of a tropical estuary	Temporal patterns in the intertidal faunal community at the mouth of a tropical estuary	The use of intertidal sandy beaches by fish and macrocrustaceans was studied at different temporal scales at the mouth of a tropical estuary. Samples were taken along the lunar and diel cycles in the late dry and rainy seasons. Fish assemblage (number of species, density and biomass), crustaceans and wrack biomass, showed significant interactions among all studied factors, and the combination of …	0	1	0	1	South America	NA	Lacerda-2014-Temporal patterns in the intertid.pdf	3	South America	Brazil	Brazil	Brazil
713	Ladd	2013	395	Ladd-2013-Practical applications of monitoring.pdf	Practical applications of monitoring results to improve maging for coral reef resilience: a case study in the Mexican Caribbean	Practical applications of monitoring results to improve managing for coral reef resilience: A case study in the Mexican Caribbean	Marine protected areas (MPAs) are promoted as an effective strategy to balance human use and conservation of marine resources, yet case studies have shown mixed results regarding MPA success. Managing to promote resilience is widely recognized as a priority for MPAs that focus on the conservation of coral reefs and the ecological services they provide. To this end, there is an acute need to devel…	0	1	0	1	Central America	NA	Ladd-2013-Practical applications of monitoring.pdf	2	North America	USA	USA
717	Lai	2015	396	Lai-2015-The effects of urbanisation on coasta.pdf	The effects of urbanisation on coastal habitats and the potential for ecological engineering: A Singapore case study	The effects of urbanisation on coastal habitats and the potential for ecological engineering: A Singapore case study	Habitat loss associated with land reclamation and shoreline development is becoming increasingly prevalent as coastal cities expand. The majority of Singapore's mangrove forests, coral reefs and sand/ mudflats disappeared between the 1920s and 1990s. Our study quantifies additional coastal transformations during the subsequent two decades, analyses the potential impact of future development plans…	0	0	1	1	Southeast Asia	NA	Lai-2015-The effects of urbanisation on coasta.pdf	5	Southeast Asia	Singapore	Singapore	New Zealand	Netherlands	Singapore
719	Lan	2009	397	Lan-2009-Assessment of some marine ecosystems.pdf	Assessment of some marine ecosystems using sustaible utilization indicators in Hai Phong  Quang Ninh coastal area, Vietm	Assessment of some marine ecosystems using sustainable utilization indicators in Hai Phong-Quang Ninh coastal area, Vietnam	This study is aimed at analyzing key indicators for the evaluation of changes and tendencies of sustainable utilization and management in some marine ecosystems in the coastal waters of Hai Phong - Quang Ninh area. To complete this study, the methods employed consisted of the application of remote sensing data and geographic information systems to extract information on spatial distribution of ma…	1	0	0	1	Southeast Asia	NA	Lan-2009-Assessment of some marine ecosystems.pdf	1	Southeast Asia	Vietnam
720	Lane	2013	398	Lane-2013-Catastrophic depletion of reef-assoc.pdf	Catastrophic depletion of reef-associated sea cucumbers: resource magement/reef resilience issues for an Indonesian marine park and the wider Indo-Paci fi c	NA	1. Commercial species of shallow-water, tropical, aspidochirotid sea cucumbers (bêche-de-mer) in the Indo-West Pacific, many of them, at maturity, large and conspicuous benthic members of coral reef or seagrass/sediment environments, represent a high-value marine resource, traditionally fished for centuries, but which currently are being heavily overfished, largely through a growing demand from m…	0	0	1	1	Southeast Asia	NA	Lane-2013-Catastrophic depletion of reef-assoc.pdf	2	Southeast Asia	Brunei	Indonesia
722	Lara-Dominguez	2005	399	Lara-DomiÌnguez-2005-Structure of a unique inla.pdf	Structure of a unique inland mangrove forest assemblage in fossil lagoons on the Caribbean Coast of Mexico	NA	Scrub mangrove wetlands colonize the intertidal zone of fossil lagoons located in carbonate continental margins along the Yucatan Peninsula ofMexico. These unique ecological types were investigated in October, 1994, by locating transects in several mangrove forests along the Caribbean coast of the peninsula. Four species of mangrove occurred at these sites including Rhizophora mangle , Avicennia …	0	0	1	1	Central America	NA	Lara-Domi?nguez-2005-Structure of a unique inla.pdf	6	Central America	Mexico	USA	Mexico	USA	Mexico	Mexico
723	Laroche	1995	400	Laroche-1995-A prelimiry survey of the artis.pdf	A prelimiry survey of the artisal fishery on coral reefs of the Tulear Region (southwest Madagascar)	A preliminary survey of the artisanal fishery on coral reefs of the Tulear Region (southwest Madagascar)	Fish catches from the coral reefs of the Tulear region (southwest Madagascar), are analyzed based on fish landings. This region of the island consists of two barrier reefs, two coral banks, three lagoon reefs and a fringing reef. The total reef area studied was 190 km z. Of the whole fishing area, the reef flat was the most frequently used by fishermen. Line catches per unit effort (CPUE) were st…	0	1	0	1	Eastern Africa	NA	Laroche-1995-A preliminary survey of the artis.pdf	2	East Africa	Madagascar	Madagascar
724	Larson	2013	401	Larson-2013-Sense of place as a determint of.pdf	Sense of place as a determint of people  s attitudes towards the environment: Implications for tural resources magement and planning in the Great Barrier Reef, Australia	Sense of place as a determinant of people's attitudes towards the environment: Implications for natural resources management and planning in the Great Barrier Reef, Australia	Integrating peoples values and perceptions into planning is essential for the successful management of natural resources. However, successful implementation of natural resources management decisions on the ground is a complex task, which requires a comprehensive understanding of a systems social and ecological linkages. This paper investigates the relationship between sense of place and people…	0	1	0	1	Australia and NZ	NA	Larson-2013-Sense of place as a determinant of.pdf	3	Australia and NZ	Australia	Australia	Australia
726	Laurans	2013	402	Laurans-2013-Economic valuation of ecosystem s.pdf	Economic valuation of ecosystem services from coral reefs in the South Paci fi c: Taking stock of recent experience	Economic valuation of ecosystem services from coral reefs in the South Pacific: Taking stock of recent experience	The economic valuation of coral reefs ecosystem services is currently seen as a promising approach to demonstrate the benefits of sustainable management of coral ecosystems to policymakers and to provide useful information for improved decisions. Most coral reefs economic studies have been conducted in the United States, Southeast Asia and the Caribbean, and only a few have covered the South Paci…	0	0	1	1	Pacific Islands	NA	Laurans-2013-Economic valuation of ecosystem s.pdf	8	Europe	France	French Polynesia	UK	Netherlands	New Caledonia	France	France	Switzerland
731	Leite	2009	403	Leite-2009-Habitat, distribution, and abundanc.pdf	Habitat, distribution, and abundance of the commercial octopus ( Octopus insularis ) in a tropical oceanic island, Brazil: Information for magement of an artisal fishery inside a marine protected area	Habitat, distribution, and abundance of the commercial octopus (Octopus insularis) in a tropical oceanic island, Brazil: Information for management of an artisanal fishery inside a marine protected area	The spatial distribution, abundance and habitat of a population of a shallow-water octopus, Octopus insularis, subject to some fishery pressure,was studied in the Fernando de Noronha Archipelago, a marine protected area off northeastern Brazil. Three techniqueswere used: visual censuses in fixed quadrants and in roving-diver and catch per unit of effort (CPUE) of the commercial fishery.We had two…	0	0	1	1	South America	NA	Leite-2009-Habitat	4	South America	Brazil	Brazil	Canada	Brazil
711	L_opold	2004	404	LeÌopold-2004-Assessment of the reliability of.pdf	Assessment of the reliability of fish consumption as an indicator of reef fish catches in small Pacific islands: The example of Ouvea Island in New Caledonia	NA	Fishing pressure on reef fish stocks, in relation to exploitable biomass, is a useful parameter for fishery resource management but difficult to assess in subsistence fisheries. A methodology for indirect fishery output assessment in island environments is proposed based on estimates of consumption and the relevant seafood trade. Ouvea atoll in the South Pacific (Loyalty Islands, New Caledonia), …	0	0	1	1	Pacific Islands	NA	Le?opold-2004-Assessment of the reliability of.pdf	3	Europe	France	France	New Caledonia
736	Leujak	2007	405	Leujak-2007-Visitor perceptions and the shifti.pdf	Visitor Perceptions and the Shifting Social Carrying Capacity of South Siis Coral Reefs	Visitor perceptions and the shifting social carrying capacity of South Sinai's coral reefs	To investigate how the perceptions and behaviour of visitors to coral reefs are influenced by their prior experience and knowledge of marine life, a questionnaire-based study was undertaken at sites in the Ras Mohammed National Park and at Sharm El Sheikh, South Sinai, Egypt. It was evident that over the 1020 years during which these reefs have deteriorated (mainly due to reef-flat trampling), t…	0	1	0	1	Eastern Africa	NA	Leujak-2007-Visitor perceptions and the shifti.pdf	2	Europe	UK	UK
737	Levine	2015	406	Levine-2015-Participatory GIS to inform coral.pdf	Participatory GIS to inform coral reef ecosystem magement: Mapping human coastal and ocean uses in Hawaii	Participatory GIS to inform coral reef ecosystem management: Mapping human coastal and ocean uses in Hawaii	Sociospatial information is critical to marine and coastal ecosystem management. The Hawaii Coastal Uses Mapping Project used a participatory geographic information systems (PGIS) methodology to gather local knowledge regarding the location and intensity of coastal human activities in Hawaii's priority sites for coral reef management. PGIS provided an efficient and effective means of obtaining in…	0	1	0	1	Hawaii	NA	Levine-2015-Participatory GIS to inform coral.pdf	2	North America	USA	USA
740	Lewis	2009	407	Lewis-2009-Herbicides_ A new threat to the Gre.pdf	Herbicides: A new threat to the Great Barrier Reef	Herbicides: A new threat to the Great Barrier Reef	The runoff of pesticides (insecticides, herbicides and fungicides) from agricultural lands is a key concern for the health of the iconic Great Barrier Reef, Australia. Relatively low levels of herbicide residues can reduce the productivity of marine plants and corals. However, the risk of these residues to Great Barrier Reef ecosystems has been poorly quantified due to a lack of large-scale datas…	0	1	0	1	Australia and NZ	NA	Lewis-2009-Herbicides_ A new threat to the Gre.pdf	10	Australia and NZ	Australia	Australia	Australia	Australia	Australia	Australia	Australia	Australia	Australia	Australia
741	Lewsey	2004	408	Lewsey-2004-Assessing climate change impacts o.pdf	Assessing climate change impacts on coastal infrastructure in the Eastern Caribbean	Assessing climate change impacts on coastal infrastructure in the Eastern Caribbean	Expected effects of changes in global climate include warmer temperatures, rising sea levels, and potentially more frequent and severe extreme weather events such as hurricanes and tropical storms. Low-lying states in the Caribbean are especially vulnerable to these effects, posing significant risks to public safety and natural resources. This paper highlights expected trends in the Eastern Carib…	0	1	0	1	Caribbean	NA	Lewsey-2004-Assessing climate change impacts o.pdf	3	North America	USA	USA	USA
743	Ley	2005	409	Ley-2005-Linking fish assemblages and attribut.pdf	Linking fish assemblages and attributes of mangrove estuaries in tropical Australia: criteria for regiol marine reserves	Linking fish assemblages and attributes of mangrove estuaries in tropical Australia: Criteria for regional marine reserves	Quantifying natural features important in structuring fish assemblages is an essential pre-requisite to implementation of measures to conserve regionally representative whole ecosystems. Tropical estuaries are high in priority for protection, but fish-ecosystem relationships have rarely been analysed at multiple scales. Fishery-independent surveys (gill nets 19 to 152 mm mesh) were replicated sea…	1	0	0	1	Australia and NZ	NA	Ley-2005-Linking fish assemblages and attribut.pdf	1	Australia and NZ	Australia
746	Li	2013	410	Li-2013-Spatial and temporal variations in sed.pdf	1 andtemporalvariationsinsedimentaccumulationdtheir impacts oncoralcommunitiesintheSanyaCoralReef Reserve, Hain, Chi	Spatial and temporal variations in sediment accumulation and their impacts on coral communities in the Sanya Coral Reef Reserve, Hainan, China	This study investigated the spatial and temporal variations of sediment accumulation and their impacts on coral communities in four sites at two or three depths (3 m, 6 m and 9 m) at the Sanya Coral Reef Reserve by deploying sediment traps on the sea floor during 20072009. Rainfall and typhoon events, which appeared to control sediment accumulation in the sea floor of the coral reef, were positi…	0	1	0	1	East Asia	NA	Li-2013-Spatial and temporal variations in sed.pdf	6	East Asia	China	China	China	China	China	China
752	Lim	2014	411	Lim-2014-Ecological effects of tural hazards.pdf	Ecological effects of tural hazards and human activities on the Ecuadorian Paci fi c coast during the late Holocene	Ecological effects of natural hazards and human activities on the Ecuadorian Pacific coast during the late Holocene	The La Tolita archeological site is located in the Province of Esmeraldas in the northwestern part of Ecuador at the border with Colombia. This area comprises one of the world's wettest coastal regions with mangrove and swamps along the coast and has one of the richest tropical rainforest of the planet, extending inland. Today this region is seriously affected by natural hazards including earthqu…	0	0	1	1	South America	NA	Lim-2014-Ecological effects of natural hazards.pdf	7	Europe	France	France	Ecuador	France	France	France	France
757	Lin	2009	412	Lin-2009-The effects of system-scale removal o.pdf	The effects of system-scale removal of oyster-culture racks from Tapong Bay, southwestern Taiwan: model exploration and comparison with field observations	The effects of system-scale removal of oyster-culture racks from Tapong Bay, southwestern Taiwan: Model exploration and comparison with field observations	Using Ecopath with Ecosim, a mass-balance trophic model was manipulated to predict temporal responses of community biomasses to the system-scale removal of oyster-culture racks from Tapong Bay, a eutrophic and poorly flushed lagoon in tropical Taiwan. The model predictions were further compared with separate field observations over a period of 2.5 years. The removal of the oysters was predicted t…	0	1	0	1	East Asia	NA	Lin-2009-The effects of system-scale removal o.pdf	5	East Asia	Taiwan	Taiwan	Taiwan	Taiwan	Taiwan
761	Lluch-Cota	2000	413	Lluch-Cota-2000-Coastal upwelling in the eastern Gulf of California.pdf	Coastal upwelling in the eastern Gulf of California	Coastal upwelling in the eastern Gulf of California	Understanding and quantifying upwelling is of great importance for marine resource management. Direct measurement of this process is extremely difficult and observed time-series do not exist. However, proxies are commonly derived from different data; most commonly wind-derived. A local wind-derived coastal upwelling index (CUI) is reported for the period 19701996 and is considered representative…	1	0	0	1	Central America	NA	Lluch-Cota-2000-Coastal upwelling in the eastern Gulf of California.pdf	1	Central America	Mexico
769	Lough	2007	414	Lough-2008-10th Anniversary Review_ A changing.pdf	10th Anniversary Review: a changing climate for coral reefs	NA	Tropical coral reefs are charismatic ecosystems that house a significant proportion of the worlds marine biodiversity. Their valuable goods and services are fundamental to the livelihood of large coastal populations in the tropics. The health of many of the worlds coral reefs, and the goods and services they provide, have already been severely compromised, largely due to overexploitation by a r…	1	0	0	1	Non-specific	NA	Lough-2008-10th Anniversary Review_ A changing.pdf	1	Australia and NZ	Australia
1267	Uthicke	2001	415	m216p109.pdf	Restricted gene flow between Holothuria scabra (Echinodermata: Holothuroidea) populations along the north-east coast of Australia and the Solomon Islands	Restricted gene flow between Holothuria scabra (Echinodermata: Holothuroidea) populations along the north-east coast of Australia and the Solomon Islands	To describe patterns of gene flow for the fished holothurian species Holothuria scabra 17 to 141 individuals were collected from 8 populations from north-east Australia, the Torres Strait, and the Solomon Islands. Samples were investigated by allozyme electrophoresis of 7 polymorphic loci. Cluster analyses using Rogers genetic distance identified 3 distinct groups of populations from the north-e…	0	1	0	1	Pacific Islands	NA	m216p109.pdf	2	Australia and NZ	Australia	Australia
742	Ley	2002	416	m245p223.pdf	4 effects of fishing closures in mangrove estuaries of tropical Australia	Ecosystem effects of fishing closures in mangrove estuaries of tropical Australia	Along the section of Australias coast adjacent to the Great Barrier Reef, certain mangrovedominated estuaries have been closed to commercial net fishing for over 5 yr. During a 2 yr bimonthly sampling program aimed at evaluating the effect of these closures, fish communities were compared among 3 pairs of neighbouring estuaries (1 closed and 1 open to commercial net fishing per pair). We employe…	0	1	0	1	Australia and NZ	NA	m245p223.pdf	5	Australia and NZ	Australia	Australia	Australia	Australia	Australia
772	Macauley	2007	417	Macauley-2007-The ecological condition of Vera.pdf	The Ecological Condition of Veracruz, Mexico Estuaries	The ecological condition of Veracruz, Mexico Estuaries	During June and July, 2002, forty-seven stations were sampled within estuaries along the gulf coast of the state of Veracruz, MX, using a probabilistic survey design and a common set of response indicators. The objective of the study was to collect information to assess the condition of estuarine waters within the state of Veracruz, and to provide data that would strengthen future assessments ofG…	0	0	1	1	Central America	NA	Macauley-2007-The ecological condition of Vera.pdf	3	North America	USA	USA	Mexico
773	Macdold	2013	418	Macdold-2013-Towards environmental magemen.pdf	Towards environmental magement of water turbidity within open coastal waters of the Great Barrier Reef	NA	Water turbidity and suspended sediment concentration (SSC) are commonly used as part of marine monitoring and water quality plans. Current management plans utilise threshold SSC values derived from mean-annual turbidity concentrations. Little published work documents typical ranges of turbidity for reefs within open coastal waters. Here, time-series turbidity measurements from 61 sites in the Gre…	0	1	0	1	Australia and NZ	NA	Macdonald-2013-Towards environmental managemen.pdf	5	Australia and NZ	Australia	Australia	Australia	Australia	Australia
776	Macintosh	2010	419	Macintosh-2010-Dealing with interests displace.pdf	Dealing with interests displaced by marine protected areas: A case study on the Great Barrier Reef Marine Park Structural Adjustment Package	Dealing with interests displaced by marine protected areas: A case study on the Great Barrier Reef Marine Park Structural Adjustment Package	NA	0	1	0	1	Australia and NZ	NA	Macintosh-2010-Dealing with interests displace.pdf	3	Australia and NZ	Australia	Australia	Australia
777	MacKenzie	2012	420	MacKenzie-2012-Nekton Communities in Hawaiian.pdf	Nekton Communities in Hawaiian Coastal Wetlands: The Distribution and Abundance of Introduced Fish Species	Nekton Communities in Hawaiian Coastal Wetlands: The Distribution and Abundance of Introduced Fish Species	Nekton communities were sampled from 38 Hawaiian coastal wetlands from 2007 to 2009 using lift nets, seines, and throw nets in an attempt to increase our understanding of the nekton assemblages that utilize these poorly studied ecosystems. Nekton were dominated by exotic species, primarily poeciliids (Gambusia affinis, Poecilia spp.) and tilapia. These fish were present in 50 85% of wetlands sam…	0	1	0	1	Hawaii	NA	MacKenzie-2012-Nekton Communities in Hawaiian.pdf	2	North America	USA	USA
779	Magsino	2008	421	Magsino-2008-The influence of contrasting life.pdf	The inXuence of contrasting life history traits and oceanic processes on genetic structuring of rabbitWsh populations Siganus argenteus and Siganus fuscescens along the eastern Philippine coasts	The influence of contrasting life history traits and oceanic processes on genetic structuring of rabbitfish populations Siganus argenteus and Siganus fuscescens along the eastern Philippine coasts	Genetic variability and structuring of rabbitW sh populations with contrasting life histories, Siganus argenteus and Siganus fuscescens were determined using allozyme analysis. A total of 1314 polymorphic loci were examined from samples collected in 2002 and 2003 from eight reefs representing 25 populations north (Kuroshio Current) and south (Mindanao Current) of the bifurcation of the North Equ…	0	1	0	1	Southeast Asia	NA	Magsino-2008-The influence of contrasting life.pdf	2	Southeast Asia	Philippines	Philippines
785	Maliao	2009	422	Maliao-2009-Performance of community-based coa.pdf	Performanceofcommunity-basedcoastalresourcemagement(CBCRM) programsinthePhilippines:Ameta-alysis	Performance of community-based coastal resource management (CBCRM) programs in the Philippines: A meta-analysis	Community-based coastal resource management (CBCRM) is a major conservation and fisheries management strategy in the tropics. In this study, the performance of 16 CBCRM programs in the Philippines was assessed using a meta-analysis of eight indicators that represented the perceptions of local resource users. Overall, the CBCRM programs in the Philippines were perceived to have a significant posit…	0	1	0	1	Southeast Asia	NA	Maliao-2009-Performance of community-based coa.pdf	3	North America	USA	USA	USA
786	Maliao	2009	422	Maliao-2009-Performance of community-based coa.pdf	Performanceofcommunity-basedcoastalresourcemagement(CBCRM) programsinthePhilippines:Ameta-alysis	Trajectories and magnitude of change in coral reef fish populations in Philippine marine reserves: A meta-analysis	Community-based coastal resource management (CBCRM) is a major conservation and fisheries management strategy in the tropics. In this study, the performance of 16 CBCRM programs in the Philippines was assessed using a meta-analysis of eight indicators that represented the perceptions of local resource users. Overall, the CBCRM programs in the Philippines were perceived to have a significant posit…	0	1	0	1	Southeast Asia	NA	Maliao-2009-Performance of community-based coa.pdf	3	North America	USA	USA	USA
787	Maliao	2009	423	Maliao-2009-Trajectories and magnitude of chan.pdf	Trajectories and magnitude of change in coral reef fish populations in Philippine marine reserves: a meta-alysis	Performance of community-based coastal resource management (CBCRM) programs in the Philippines: A meta-analysis	Marine reserves are widely implemented worldwide to meet both conservation and fisheries management goals. This study examines the efficacy of Philippine marine reserves using meta-analysis by comparing variations in fish density (1) between reserves and adjacent fished reefs (spatial comparison), (2) within reserves before establishment relative to years following the establishment (temporal com…	0	0	1	1	Southeast Asia	NA	Maliao-2009-Trajectories and magnitude of chan.pdf	4	North America	USA	USA	Philippines	USA
788	Maliao	2009	423	Maliao-2009-Trajectories and magnitude of chan.pdf	Trajectories and magnitude of change in coral reef fish populations in Philippine marine reserves: a meta-alysis	Trajectories and magnitude of change in coral reef fish populations in Philippine marine reserves: A meta-analysis	Marine reserves are widely implemented worldwide to meet both conservation and fisheries management goals. This study examines the efficacy of Philippine marine reserves using meta-analysis by comparing variations in fish density (1) between reserves and adjacent fished reefs (spatial comparison), (2) within reserves before establishment relative to years following the establishment (temporal com…	0	0	1	1	Southeast Asia	NA	Maliao-2009-Trajectories and magnitude of chan.pdf	4	North America	USA	USA	Philippines	USA
791	Mamauag	2013	424	Mamauag-2013-A framework for vulnerability ass.pdf	A framework for vulnerability assessment of coastal fisheriesecosystems to climate changeTool for understanding resilience offisheries (VA_TURF)	A framework for vulnerability assessment of coastal fisheries ecosystems to climate change-Tool for understanding resilience of fisheries (VA-TURF)	Vulnerability assessment (VA) is increasingly developed and utilized in various sectors and fields of soci-ety. VA provides a better understanding of the interactions among system, pressures, and threats, whichserves as a basis for targeted adaptation strategies. The framework or tool named tool for understand-ing resilience of fisheries (VATURF) was developed to assess the vulnerability of the …	0	1	0	1	Southeast Asia	NA	Mamauag-2013-A framework for vulnerability ass.pdf	9	Southeast Asia	Philippines	Philippines	Philippines	Philippines	Philippines	Philippines	Philippines	Philippines	Philippines
1162	Schwerdtner Ma_ez	2010	425	MaÌnÌez-2010-The history of Makassan trepang fis.pdf	The history of Makassan Trepang Fishing and Trade	NA	The Malayan term trepang describes a variety of edible holothurians commonly known as sea cucumbers. Although found in temperate and tropical marine waters all over the world, the centre of species diversity and abundance are the shallow coastal waters of Island Southeast Asia. For at least 300 years, trepang has been a highly priced commodity in the Chinese market. Originally, its fishing and tr…	0	1	0	1	Southeast Asia	NA	Ma?n?ez-2010-The history of Makassan trepang fis.pdf	2	Europe	Germany	Germany
792	Mangubhai	2012	426	Mangubhai-2012-Papuan Bird's Head Seascape_ Em.pdf	Papuan Birds Head Seascape: Emerging threats and challenges in the global center of marine biodiversity	Papuan Bird's Head Seascape: Emerging threats and challenges in the global center of marine biodiversity	The Birds Head Seascape located in eastern Indonesia is the global epicenter of tropical shallow water marine biodiversity with over 600 species of corals and 1,638 species of coral reef fishes. The Seascape also includes critical habitats for globally threatened marine species, including sea turtles and cetaceans. Since 2001, the region has undergone rapid development in fisheries, oil and gas …	0	0	1	1	Pacific Islands	NA	Mangubhai-2012-Papuan Bird's Head Seascape_ Em.pdf	15	Southeast Asia	Indonesia	Indonesia	Indonesia	Indonesia	Indonesia	Indonesia	Indonesia	Indonesia	Indonesia	Indonesia	Indonesia	USA	Indonesia	Indonesia	Indonesia
795	Maragos	1995	427	Maragos-1995-The 1991-1992 rapid ecological as.pdf	The 1991-1992 rapid ecological assessment of Palau's coral reefs	The 1991-1992 rapid ecological assessment of Palau's coral reefs	At the request of the Palau and US governments, a team of 30 scientists under the leadership of the Nature Conservancy completed a rapid ecological assessment (REA) of nearshore marine resources in Palau in 1992. The REA provided ecological input to Palau's ongoing master plan for economic development and identified 45 marine sites worthy of special protection. The REA relied on previous literatu…	0	1	0	1	Pacific Islands	NA	Maragos-1995-The 1991-1992 rapid ecological as.pdf	2	North America	USA	USA
796	Marcus	2007	428	Marcus-2007-Benthic status of near-shore fishi.pdf	Benthic status of near-shore fishing grounds in the central Philippines and associated seahorse densities	Benthic status of near-shore fishing grounds in the central Philippines and associated seahorse densities	Benthic status of 28 near-shore, artisanal, coral reef fishing grounds in the central Philippines was assessed (20002002) together with surveys of the seahorse, Hippocampus comes. Our measures of benthic quality and seahorse densities reveal some of the most degraded coral reefs in the world. Abiotic structure dominated the fishing grounds: 69% of the benthos comprised rubble (32%), sand/silt (2…	0	0	1	1	Southeast Asia	NA	Marcus-2007-Benthic status of near-shore fishi.pdf	5	North America	Canada	UK	UK	Philippines	Canada
797	Mariano	2015	429	Mariano-2015-Intertidal benthic macrofaul as.pdf	Intertidal benthic macrofaul assemblages: changes in structure along entire tropical estuarine salinity gradients	Intertidal benthic macrofaunal assemblages: Changes in structure along entire tropical estuarine salinity gradients	Spatial variation in the structure of macrobenthic assemblages on intertidal flats is known to be related to different environmental variables. Most of the studies have observed that along the estuarine gradient, salinity is the most important variable driving the patterns of the macrobenthic assemblages. However, the great majority of studies have been done on single estuarine systems in tempera…	0	1	0	1	South America	NA	Mariano-2015-Intertidal benthic macrofaunal as.pdf	2	South America	Brazil	Brazil
800	Marriott	2014	430	Marriott-2014-Abundance indices for long-lived.pdf	Abundance indices for long-lived tropical sppers: estimating standardized catch rates from spatially and temporally coarse logbook data	Abundance indices for long-lived tropical snappers: Estimating standardized catch rates from spatially and temporally coarse logbook data	The Northern Demersal Scalefish Fishery has historically comprised a small fleet (?10 vessels year21) operating over a relatively large area off the northwest coast of Australia. This multispecies fishery primarily harvests two species of snapper: goldband snapper, Pristipomoides multidens and red emperor, Lutjanus sebae.Akey input to age-structured assessments of these stocks has been the annual…	0	1	0	1	Australia and NZ	NA	Marriott-2014-Abundance indices for long-lived.pdf	4	Australia and NZ	Australia	Australia	Australia	Australia
806	Masud	2014	431	Masud-2014-Impact of residents' livelihoods on.pdf	Impact of residents livelihoods on attitudes towards environmental conservation behaviour: An empirical investigation of Tioman Island Marine Park area, Malaysia	Impact of residents' livelihoods on attitudes towards environmental conservation behaviour: An empirical investigation of Tioman Island Marine Park area, Malaysia	This study examines the establishment of marine park areas (MPAs) in Malaysia, with specific reference to the Tioman Island off the east coast of Peninsular Malaysia. This paper investigates livelihood sustainability and environmental issues in MPAs, focussing on socio-economic conditions and the sustainability of communities. The purpose of this study is to explore the impact communities well-b…	0	1	0	1	Southeast Asia	NA	Masud-2014-Impact of residents' livelihoods on.pdf	4	Southeast Asia	Malaysia	Malaysia	Malaysia	Malaysia
808	Mate	2003	432	Mate2003.pdf	Ecological, genetic, and morphological differences among three Pavo (Cnidaria: Anthozoa) species from the Pacific coast of Pama	NA	Ecological, genetic, and morphological differences among three Panamanian Pacific Pavona species with strongly developed collines (Pavona varians , P. frondifera , and P. chiriquiensis ) were examined. Ecological factors included geographical distributions of species, habitat preferences, interspecific interactions, reproductive ecology, and tolerance to bleaching. Genetic differences were based …	1	0	0	1	Central America	NA	Mate2003.pdf	1	North America	USA
814	MAYRD	2009	433	Mayrd-2010-Making a model meaningful to cora.pdf	Making a Model Meaningful to Coral Reef Magers in a Developing tion: a Case Study of Overfishing and Rock Anchoring in Indonesia	NA	Most of the worlds coral reefs line the coasts of developing nations, where impacts from intense and destructive fishing practices form critical conservation issues for managers. Overfishing of herbivorous fishes can cause phase shifts to macroalgal dominance, and fishers use of rocks as anchors lowers coral cover, giving further competitive advantage to macroalgae. Overfishing and anchoring ha…	0	1	0	1	Southeast Asia	NA	Maynard-2010-Making a model meaningful to cora.pdf	5	Australia and NZ	Australia	Australia	Australia	Australia	Australia
813	Mayrd	2011	434	Mayrd-2011-Predicting outbreaks of a climate.pdf	Predicting outbreaks of a climate-driven coral disease in the Great Barrier Reef	NA	Links between anomalously high sea temperatures and outbreaks of coral diseases known as White Syndromes (WS) represent a threat to Indo-Pacific reefs that is expected to escalate in a changing climate. Further advances in understanding disease aetiologies, determining the relative importance of potential risk factors for outbreaks and in trialing management actions are hampered by not knowing wh…	0	0	1	1	Australia and NZ	NA	Maynard-2011-Predicting outbreaks of a climate.pdf	9	Australia and NZ	Australia	Australia	USA	Australia	Australia	Australia	Australia	Australia	Australia
812	Maypa	2012	435	Maypa-2012-Marine Protected Area Magement Ef.pdf	Marine Protected Area 5 Effectiveness: Progress and Lessons in the Philippines	Marine Protected Area Management Effectiveness: Progress and Lessons in the Philippines	Quantifying progress in management of marine protected areas (MPAs) is crucial to marine conservation and fisheries management in the Philippines. This study compiles data on the status, occurrence, and management gaps of MPAs through coordination with multiple organizations supporting and guiding MPAs in the Philippines. MPA management effectiveness was measured using a MPA Rating System. Since …	0	0	1	1	Southeast Asia	NA	Maypa-2012-Marine Protected Area Management Ef.pdf	7	Southeast Asia	Philippines	USA	Philippines	Philippines	Philippines	Philippines	Philippines
818	McClahan	1997	436	McClahan-1997-The effects of traditiol fis.pdf	Sedinmentation effects on shallow coral communities in Kenya	NA	Many traditions of coastal peoples may be viewed as traditional forms of marine conservation because, like modern fisheries management, they restrict fishing gear, fishing times, and places, but their effects are little studied in practice. A study was undertaken of human culture and fisheries resources in an area of southern Kenya, designated as a national marine reserve, to determine the effect…	0	0	1	1	Eastern Africa	NA	McClanahan-1997-The effects of traditional fis.pdf	4	East Africa	Kenya	USA	UK	Kenya
819	McClahan	1998	437	McClahan-1998-An ecological shift in a remot.pdf	An ecological shift in a remote coral atoll of Belize over 25 years	NA	Many coral reefs in the Caribbean, and elsewhere, have undergone changes from hard coral to fleshy algal dominance over the past two decades which has often been interpreted as a localized response to eutrophication and fishing. Here, data on the abundance of hard corals and algae from lagoonal patch reefs distributed throughout a large (260 km2 ) remote reef atoll located approximately 30 km off…	0	1	0	1	Central America	NA	McClanahan-1998-An ecological shift in a remot.pdf	2	East Africa	Kenya	Kenya
820	McClahan	1999	438	McClahan-1999-The effects of marine parks an.pdf	The eects of marine parks and Âshing on coral reefs of northern Tanzania	NA	The macrobenthic (coral, algae, and sea urchins) and ®sh communities in 15 back-reef sites on the patch and rock-island reefs of southern Kenya and northern Tanzania ( 250 km of coastline) were studied in order to (1) test an over®shing model developed in Kenya's fringing reef (McClanahan, 1995a, A coral reef ecosystem-®sheries model: impacts of ®shing intensity and catch selection on reef struct…	0	0	1	1	Eastern Africa	NA	McClanahan-1999-The effects of marine parks an.pdf	5	East Africa	Kenya	Kenya	Tanzania	Tanzania	Kenya
824	McClahan	2007	439	McClahan-2007-Effects of climate and seawate.pdf	EFFECTS OF CLIMATE AND SEAWATER TEMPERATURE VARIATION ON CORAL BLEACHING AND MORTALITY	NA	Coral bleaching due to thermal and environmental stress threatens coral reefs and possibly people who rely on their resources. Here we explore patterns of coral bleaching and mortality in East Africa in 1998 and 2005 in a region where the equatorial current and the island effect of Madagascar interact to create different thermal and physicochemical environments. A variety of temperature statistic…	0	0	1	1	Non-specific	NA	McClanahan-2007-Effects of climate and seawate.pdf	5	North America	USA	Kenya	Tanzania	Kenya	Tanzania
825	McClahan	2008	440	McClahan-2008-Long-term changes in coral col.pdf	Long-term changes in coral colony size distributions on Kenyan reefs under different magement regimes and across the 1998 bleaching event	NA	Colony size is an important life-history characteristic of corals and changes in colony size will have significant effects on coral populations. This study summarizes * 21,000 haphazard colony size measurements of 26 common coral taxa (mostly coral genera) collected annually between 1992 and 2006 in seven Kenyan reef lagoons. There was a major coral bleaching and mortality event in early 1998 and…	0	0	1	1	Eastern Africa	NA	McClanahan-2008-Long-term changes in coral col.pdf	3	North America	USA	Kenya	Kenya
828	MCCLAHAN	2008	441	McClahan-2008-Malthusian overfishing and eff.pdf	MALTHUSIAN OVERFISHING AND EFFORTS TO OVERCOME IT ON KENYAN CORAL REEFS	NA	This study examined trends along a gradient of fishing intensity in an artisanal coral reef fishery over a 10-year period along 75 km of Kenyas most populated coastline. As predicted by Malthusian scenarios, catch per unit effort (CPUE), mean trophic level, the functional diversity of fished taxa, and the diversity of gear declined, while total annual catch and catch variability increased along …	0	0	1	1	Eastern Africa	NA	McClanahan-2008-Malthusian overfishing and eff.pdf	3	North America	USA	Kenya	Canada
826	McClahan	2011	442	McClahan-2011-Relationships between benthic.pdf	Relationships between benthic cover, current strength, herbivory, and a fisheries closure in Glovers Reef Atoll, Belize	NA	Benthic cover, current strengths, and fish abundance and diversity were examined on 150 lagoonal patch reefs and mapped to determine their distribution, inter-relationships, and relationship to the fisheries closure in Glovers Reef Atoll. Current strength was highest at both the northern and southern ends of the atoll and largely controlled by local wind and weakly by tidal forcing. Benthic funct…	0	1	0	1	Central America	NA	McClanahan-2011-Relationships between benthic.pdf	2	North America	USA	USA
827	McClahan	2014	443	McClahan-2014-Perceived benefits of fisherie.pdf	Perceived Benefits of Fisheries 5 Restrictions in Madagascar	NA	Perceptions of the benefits of fisheries management restrictions were evaluated in coastal Madagascar to identify restrictions that are likely to be self- and community enforced. The survey focused on 24 Malagasy fishing villages adjacent to coral reefs. Resource users' perceptions of the benefits of restrictions were generally high and widespread, but some less positive perceptions were found in…	0	0	1	1	Eastern Africa	NA	McClanahan-2014-Perceived benefits of fisherie.pdf	7	North America	USA	Australia	USA	USA	Madagascar	Madagascar	USA
838	McKlatchey	2005	444	McClatchey-2005-A Proposed PABITRA Study Area.pdf	A proposed PABITRA study on Lauru Island, Soloman, Islands	NA	The island of Lauru (Choiseul) in the western Solomon Islands is a high (up to 1,060 m) mixed volcanic and limestone uplifted island, located between 6.5 and 7.5 S latitude and 156.5 and 157.5 E longitude. The central part of the island is suggested for inclusion in the Pacific-Asia Biodiversity Transect (PABITRA) system. The proposed area consists of the north-central coast, Mount Barokasa (850 …	0	0	1	1	Pacific Islands	NA	McClatchey-2005-A Proposed PABITRA Study Area.pdf	5	North America	USA	Solomon Islands	Solomon Islands	Solomon Islands	Solomon Islands
831	McCliment	2012	445	McCliment-2012-An all-taxon microbial inventor.pdf	An all-taxon microbial inventory of the Moorea coral reef ecosystem	An all-taxon microbial inventory of the Moorea coral reef ecosystem	The Moorea Coral Reef Long Term Ecological Research (LTER) Site (17.501S, 149.831W) comprises the fringe of coral reefs and lagoons surrounding the volcanic island of Moorea in the Society Islands of French Polynesia. As part of our Microbial Inventory Research Across Diverse Aquatic LTERS biodiversity inventory project, we characterized microbial community composition across all three domains of…	0	1	0	1	Pacific Islands	NA	McCliment-2012-An all-taxon microbial inventor.pdf	6	North America	USA	USA	USA	USA	USA	USA
832	McCloskey	2013	446	McCloskey-2013-Sedimentary history of mangrove.pdf	Sedimentary 11 of Mangrove Cays in Turneffe Islands, Belize: Evidence for Sudden Environmental Reversals	Sedimentary history of mangrove cays in turneffe Islands, Belize: Evidence for sudden environmental reversals	The Holocene history of the continental margin of Belize has frequently been interpreted as being very straightforward, controlled almost entirely by postglacial sea level rise. Depending upon location, the dominant depositional environment, whether coral or mangrove, is either able to keep up with the rising sea level and thereby maintain its integrity through the present, or becomes drowned. He…	0	1	0	1	Central America	NA	McCloskey-2013-Sedimentary history of mangrove.pdf	2	North America	USA	USA
837	MCKEE	2007	447	McKee-2007-Caribbean mangroves adjust to risin.pdf	MANGROVE RECRUITMENT AFTER FOREST DISTURBANCE IS FACILITATED BY HERBACEOUS SPECIES IN THE CARIBBEAN	NA	Aim The long-term stability of coastal ecosystems such as mangroves and salt marshes depends upon the maintenance of soil elevations within the intertidal habitat as sea level changes. We examined the rates and processes of peat formation by mangroves of the Caribbean Region to better understand biological controls on habitat stability. Location Mangrove-dominated islands on the Caribbean coasts …	0	1	0	1	Central America	NA	McKee-2007-Caribbean mangroves adjust to risin.pdf	3	North America	USA	USA	USA
836	McKee	2007	448	McKee-2007-Mangrove recruitment after forest d.pdf	Caribbean mangroves adjust to rising sea level through biotic controls on change in soil elevation	Mangrove recruitment after forest disturbance is facilitated by herbaceous species in the Caribbean	Plant communities along tropical coastlines are often affected by natural and human disturbances, but little is known about factors influencing recovery. We focused on mangrove forests, which are among the most threatened ecosystems globally, to examine how facilitation by herbaceous vegetation might improve forest restoration after disturbance. We specifically investigated whether recovery of ma…	0	1	0	1	Central America	NA	McKee-2007-Mangrove recruitment after forest d.pdf	3	North America	USA	USA	USA
843	Mcleod	2010	449	McLeod-2010-Sea-level rise vulnerability in th.pdf	Sea-level rise vulnerability in the countries of the Coral Triangle	Sea-level rise vulnerability in the countries of the Coral Triangle	Sea-level rise is a major threat facing the Coral Triangle countries in the twenty-first century. Assessments of vulnerability and adaptation that consider the interactions among natural and social systems are critical to identifying habitats and communities vulnerable to sea-level rise and for supporting the development of adaptation strategies. This paper presents such an assessment using the D…	0	0	1	1	Southeast Asia	NA	McLeod-2010-Sea-level rise vulnerability in th.pdf	6	North America	USA	Germany	Germany	UK	Australia	USA
842	Mcleod	2010	450	McLeod-2010-Warming seas in the coral triangle.pdf	Warming Seas in the Coral Triangle: Coral Reef Vulnerability and 5 Implications	Sea-level rise vulnerability in the countries of the Coral Triangle	The highest diversity coral reefs in the world, located in the Coral Triangle, are threatened by a variety of local stresses including pollution, overfishing, and destructive fishing in addition to climate change impacts, such as increasing sea surface temperatures (SSTs), and ocean acidification. As climate change impacts increase, coral reef vulnerability at the ecoregional scale will have an i…	0	0	1	1	Southeast Asia	NA	McLeod-2010-Warming seas in the coral triangle.pdf	9	North America	USA	USA	USA	USA	USA	Canada	USA	USA	USA
846	McManus	1997	451	McManus-1997-Effects of some destructive fishi.pdf	Effects of Some Destructive Fishing Methods on Coral Cover and Potential Rates of Recovery	Tropical marine fisheries and the future of coral reefs: A brief review with emphasis on Southeast Asia	Effects of fishing with explosives (blastfishing) and sodium cyanide and of anchor damage on live coral were investigated on a heavily exploited fringing reef in Bolinao, Philippines from 1987 to 1990. A simple balance-sheet model indicated that approximately 1.4%/yr of the hermatypic coral cover may have been lost to blasting, 0.4%/yr to cyanide, and 0.03%/yr to coral-grabbing anchors, the poten…	0	1	0	1	Southeast Asia	NA	McManus-1997-Effects of some destructive fishi.pdf	3	Southeast Asia	Philippines	Philippines	Philippines
851	Mendes	2007	452	Mendes-2007-Taxonomic sufficiency for soft-bot.pdf	Taxonomic sufficiency for soft-bottom sublittoral mollusks assemblages in a tropical estuary, Guabara Bay, Southeast Brazil	Taxonomic sufficiency for soft-bottom sublittoral mollusks assemblages in a tropical estuary, Guanabara Bay, Southeast Brazil	Guanabara Bay (GB) is considered to be one of the most polluted environments of the southern Brazilian coastline. This typical estuarine system is impacted by the heavy discharge of both industrial and domestic waste from the Rio de Janeiro metropolitan area. The mollusc community structure and distribution was investigated between 2000 and 2001, using a three month sampling design of 38 stations…	0	1	0	1	South America	NA	Mendes-2007-Taxonomic sufficiency for soft-bot.pdf	3	South America	Brazil	Brazil	Brazil
852	Mendoncôa	2011	453	MendoncÌ§a-2011-Phylogeography and genetic popul.pdf	Phylogeography and genetic population structure of Caribbean sharpnose shark Rhizoprionodon porosus	NA	Sharks of the genus Rhizoprionodon are among the most important predators along the coastal marine ecosystems, and they represent an important economic resource for the small-scale fisheries. To properly manage and conserve exploited shark species, detailed analyses of their population structure are needed. To evaluate the gene flow and levels of the genetic diversity among populations of the Car…	0	1	0	1	South America	NA	Mendonc?a-2011-Phylogeography and genetic popul.pdf	4	South America	Brazil	Brazil	Brazil	Brazil
854	Meng	2008	454	Meng-2008-A long-term survey on anthropogenic.pdf	A long-term survey on anthropogenic impacts to the water quality of coral reefs, southern Taiwan	A long-term survey on anthropogenic impacts to the water quality of coral reefs, southern Taiwan	Before 2001, the ecological protection area in the Kenting National Park (KTNP), southern Taiwan, was poorly described. In this study, a set of four-year data (2001e2004) of seawater qualities at 19 sampling sites around the Nanwan Bay in the KTNP was used to explore anthropogenic impacts to ecological environment, especially coral reefs. The parameters of water quality were analyzed immediately …	0	1	0	1	East Asia	NA	Meng-2008-A long-term survey on anthropogenic.pdf	7	East Asia	Taiwan	Taiwan	Taiwan	Taiwan	Taiwan	Taiwan	Taiwan
1290	VINUEZA	2014	455	MengeBruceIntegrativeBiologyOceanographicClimaticVariation.pdf	Oceanographic and climatic variation drive top-down/bottom-up coupling in the Galaâpagos intertidal meta-ecosystem	NA	The impact of herbivores on primary producers in differing oceanographic regimes is a matter of intense ecological interest due to ongoing changes in their abundance, that of their predators, and anthropomorphic alteration of nutrient cycles and climatic patterns. Interactions between productivity and herbivory in marine habitats have been studied on temperate rocky shores, coral reefs, mangroves…	0	0	1	1	South America	NA	MengeBruceIntegrativeBiologyOceanographicClimaticVariation.pdf	4	South America	Ecuador	USA	Germany	USA
1073	Raquino	2014	456	MEQ-09-2013-0097.pdf	Integrating marine biodiversity through Philippine local development plans	NA	Purpose  The purpose of this paper is to highlight how data from marine protected area (MPA) surveys can be used to facilitate the development of systematic approaches to monitoring biodiversity within local government development plans and across marine bioregions. Design/methodology/approach  The study focussed on coastal Barangays of the Municipality of San Luis, Aurora Philippines. A Partic…	0	1	0	1	Southeast Asia	NA	MEQ-09-2013-0097.pdf	3	Southeast Asia	Philippines	Philippines	Philippines
1245	TONIOLI	2010	457	mfr7122.pdf	Extending the Bajo de Sico, Puerto Rico, Seasol Closure: An Examition of Small-scale Fishermens Perceptions of Possible Socio-economic Impacts on Fishing Practices, Families, and Community	NA	Despite considerable conservation efforts, many reef fish fisheries around the world continue to be in peril. Many are vulnerable to overexploitation because they have predictable and highly aggregated spawning events. In U.S. Caribbean waters, fishery managers are increasingly interested in advancing the use of closed areas as a means for rebuilding reef fisheries, protecting coral reef habitats…	0	1	0	1	Caribbean	NA	mfr7122.pdf	3	North America	USA	USA	USA
858	Mills	2011	458	Mills-2011-Incorporating Effectiveness of Comm.pdf	Incorporating Effectiveness of Community-Based 5 in a tiol Marine Gap Alysis for Fiji	Incorporating Effectiveness of Community-Based Management in a National Marine Gap Analysis for Fiji	Every action in a conservation plan has a different level of effect and consequently contributes differentially to conservation. We examined how several community-based, marine, management actions differed in their contribution to national-level conservation goals in Fiji. We held a workshop with experts on local fauna and flora and local marine management actions to translate conservation goals …	0	0	1	1	Pacific Islands	NA	Mills-2011-Incorporating Effectiveness of Comm.pdf	5	Australia and NZ	Australia	Fiji	Australia	Australia	Fiji
252	Chou	2010	459	Ming Chou-2010-Temporal Changes in Reef Commun.pdf	2 Changes in Reef Community Structure at Bintan Island (Indonesia) Suggest Need for Integrated 5	NA	Reefs in Southeast Asia, such as those in Indonesias Riau archipelago, are among the most diverse habitats in the sea, but limited baseline data pose a severe challenge for their conservation. Here, we surveyed five reef sites along the northern coast of Bintan Island to determine the most recent condition of the benthic and fish communities. Fourteen years of resort development on the island ha…	0	1	0	1	Southeast Asia	NA	Ming Chou-2010-Temporal Changes in Reef Commun.pdf	6	Southeast Asia	Singapore	Singapore	Singapore	Singapore	Singapore	Singapore
861	Miranda	2005	460	Miranda-2005-Changes in four complementary fac.pdf	Changes in four complementary facets of fish diversity in a tropical coastal lagoon after 18 years: a functiol interpretation	Changes in four complementary facets of fish diversity in a tropical coastal lagoon after 18 years: A functional interpretation	In a natural world increasingly transformed by human activities, the contemporary acceleration of biodiversity loss is now widely accepted. Coastal and estuarine environments are some of the most productive ecological systems on Earth and are able to provide many essential ecosystem goods and services, such as protein from fish or nutrient exports to adjacent marine ecosystems. Unfortunately, coa…	0	0	1	1	Central America	NA	Miranda-2005-Changes in four complementary fac.pdf	6	Central America	Mexico	France	Mexico	Mexico	France	Mexico
863	Moberg	2003	461	Moberg-2003-Ecosystem services of the tropical.pdf	4 services of the tropical seascape: interactions, substitutions and restoration	Ecosystem services of the tropical seascape: Interactions, substitutions and restoration	The tropical coastal seascape often includes a patchwork of mangroves, seagrass beds, and coral reefs that produces a variety of natural resources and ecosystem services. By looking into a limited number of attempts at substitution and restoration of ecosystem services (e.g. artificial reefs, aquaculture in mangroves, artificial seawalls), we address the questions:(1) To what degree can techn…	0	1	0	1	Non-specific	NA	Moberg-2003-Ecosystem services of the tropical.pdf	2	Europe	Sweden	Sweden
866	Mohammed	2002	462	Mohammed-2002-Pollution magement in Zanzibar.pdf	Pollution magement in Zanzibar: the need for a new approach	Pollution management in Zanzibar: The need for a new approach	Coastal pollution is increasingly becoming a source of concern in Zanzibar. Untreated municipal wastewater discharged into coastal waters and in some places directly onto coastal habitats, such as mangroves, is having serious impacts on the natural environment and potentially on the economic base that many of the islanders depend. Coastal pollution is threatening the health of mangroves, seagrass…	1	0	0	1	Eastern Africa	NA	Mohammed-2002-Pollution management in Zanzibar.pdf	1	East Africa	Tanzania
867	Mohanty	2008	463	Mohanty-2008-Monitoring and magement of envi.pdf	Monitoring and 5 of Environmental Changes along the Orissa Coast	Monitoring and management of environmental changes along the Orissa Coast	Orissa, the maritime state along the east coast of India, has a coastline of 480 km. The southern part of the coast has a narrow shelf, but the north Orissa coast has an extended continental shelf. The coastline is bestowed with six major estuaries, Indias second largest mangrove forest (Bhitarkanika Sanctuary), Asias largest brackish water coastal lagoon (Chilika), extensive sandy beaches rich…	0	1	0	1	Southwest Asia	NA	Mohanty-2008-Monitoring and management of envi.pdf	4	Southwest Asia	India	India	India	India
871	MOLLOY	2013	464	Molloy-2013-How much sampling does it take to.pdf	How much sampling does it take to detect trends in coral-reef habitat using photoquadrat surveys?	NA	1. Coral-reef managers must detect and reverse collapses in habitat and evaluate the success of such interventions. Since these responsibilities must be met with limited time and resources,methods used should balance statistical power with practical and logistical constraints. 2. Photoquadrat analysis is a commonly used method to survey coral habitats. This method, which involves photographing su…	0	0	1	1	Southeast Asia	NA	Molloy-2013-How much sampling does it take to.pdf	7	North America	Canada	Canada	Philippines	Canada	Canada	UK	Canada
293	Cort_s	2009	465	Monitoring coral reefs, seagrasses and mangroves_COMPL1.pdf	Status and conservation of coral reefs in Costa Rica	NA	Costa Rica has coral communities and reefs on the Caribbean coast and on the Pacific along the coast and off-shore islands. The Southern section of the Caribbean coast has fringing and patch reefs, carbonate banks, and an incipient algal ridge. The Pacific coast has coral communities, reefs and isolated coral colonies. Coral reefs have been seriously impacted in the last 30 years, mainly by sedim…	0	1	0	1	Central America	NA	Monitoring coral reefs	4	Central America	Costa Rica	Costa Rica	Costa Rica	Costa Rica
875	Mora	2008	466	Mora-2008-A clear human footprint in the coral.pdf	A clear human footprint in the coral reefs of the Caribbean	A clear human footprint in the coral reefs of the Caribbean	The recent degradation of coral reefs worldwide is increasingly well documented, yet the underlying causes remain debated. In this study, we used a large-scale database on the status of coral reef communities in the Caribbean and analysed it in combination with a comprehensive set of socioeconomic and environmental databases to decouple confounding factors and identify the drivers of change in co…	1	0	0	1	Caribbean	NA	Mora-2008-A clear human footprint in the coral.pdf	1	North America	Canada
878	Moreno	2004	467	Moreno-2004-The flow cytometry, a new tool for.pdf	The flow cytometry, a new tool for trophic coastal ecosystem diagnostic	The flow cytometry, a new tool for trophic coastal ecosystem diagnostic	The aim of this study is to develop a synthetic ecological index from phytoplanktonic data. An ecological index was developed from 78 flow cytometric data sampled in four sites (3 in Madagascar and 1 in Mozambique) and 108 samples (2 malagasy and 1 moroccan sites) for validation. This index describes the trophic level, the microbial loop activity and the stability of the system. According to seve…	0	1	0	1	Eastern Africa	NA	Moreno-2004-The flow cytometry	2	Europe	France	France
881	Morrison	1999	468	Morrison-1999-Fiji's Great Astrolabe Lagoon_ B.pdf	Fiji's Great Astrolabe Lagoon: baseline study and magement issues for a pristine marine environment	Fiji's Great Astrolabe Lagoon: Baseline study and management issues for a pristine marine environment	The Great Astrolabe Lagoon (18345@S, 178332@E), located some 70 km south of Suva, the capital of Fiji, is a marine environment in relatively pristine condition, impacted only by low human populations on small islands. The Great Astrolabe Reef which encloses the Lagoon is a barrier reef composed of oceanic ribbon reefs. A baseline study of the Lagoon was carried out in 1989}92 which consisted of t…	0	0	1	1	Pacific Islands	NA	Morrison-1999-Fiji's Great Astrolabe Lagoon_ B.pdf	2	Australia and NZ	Australia	Fiji
882	Morrison	2006	469	Morrison-2007-Human Impacts on the Nearshore E.pdf	Human Impacts on the Nearshore Environment: An Archaeological Case Study from Kaua¥i, Hawaiian Islands	NA	Archaeology provides a long-term framework to document prehistoric resource use and habitat modification. Excavation at Nualolo Kai, Kauai, yielded a large, well-preserved shellfish assemblage. Analysis determined the susceptibility of mollusk communities to human foraging pressures in the past. Some coral reef and intertidal species, such as Turbo sandwicensis and Strombus maculatus, declined …	0	1	0	1	Hawaii	NA	Morrison-2007-Human Impacts on the Nearshore E.pdf	2	North America	USA	USA
883	Morrison	2008	470	Morrison-2008-Ciguatera fish poisoning in la H.pdf	Ciguatera Fish Poisoning in La Haba, Cuba: A Study of Local Social-Ecological Resilience	Assessing the role of climate change and human predation on marine resources at the Fatu-ma-Futi site, tutuila Island, American Samoa: an agent based model	Following the collapse of the Cuban economy in the early 1990s, epidemiologists in the Cuban Ministry of Health noticed dramatic increases in reported outbreaks of ciguatera fish poisoning (CFP) in some coastal communities. This article summarizes the results of a comparative case study which applied an ecosystem approach to human health to investigate this issue. Situated learning and complexity…	0	0	1	1	Caribbean	NA	Morrison-2008-Ciguatera fish poisoning in la H.pdf	5	North America	Canada	Cuba	Cuba	Canada	Canada
884	Morrison	2008	470	Morrison-2008-Ciguatera fish poisoning in la H.pdf	Ciguatera Fish Poisoning in La Haba, Cuba: A Study of Local Social-Ecological Resilience	Ciguatera fish poisoning in la Habana, Cuba: A study of local social-ecological resilience	Following the collapse of the Cuban economy in the early 1990s, epidemiologists in the Cuban Ministry of Health noticed dramatic increases in reported outbreaks of ciguatera fish poisoning (CFP) in some coastal communities. This article summarizes the results of a comparative case study which applied an ecosystem approach to human health to investigate this issue. Situated learning and complexity…	0	0	1	1	Caribbean	NA	Morrison-2008-Ciguatera fish poisoning in la H.pdf	5	North America	Canada	Cuba	Cuba	Canada	Canada
885	Morrison	2013	471	Morrison-2013-Anthropogenic biogeochemical imp.pdf	AnthropogenicbiogeochemicalimpactsoncoralreefsinthePacific IslandsAn overview	Anthropogenic biogeochemical impacts on coral reefs in the Pacific Islands-An overview	Coral reefs dominate the coastal environment in many Pacific Islands, being present as atolls, coral platforms, barrier and fringing reefs. With ever increasing populations and migration of people to the coast, the anthropogenic impacts on these reefs have increased dramatically in the last 30 years. While research on these impacts has been limited, some important progress has been made. This pap…	0	0	1	1	Pacific Islands	NA	Morrison-2013-Anthropogenic biogeochemical imp.pdf	4	Australia and NZ	Australia	Guam	Fiji	Australia
886	Morton	2001	472	Morton-2001-South Chi Sea.pdf	South Chi Sea	South China Sea	The South China Sea is poorly understood in terms of its marine biota, ecology and the human impacts upon it. What is known is most often contained in reports and workshop and conference documents that are not available to the wider scientific community. The South China Sea has an area of some 3.3 million km2 and depths range from the shallowest coastal fringe to 5377 m in the Manila Trench. It i…	0	1	0	1	Southeast Asia	NA	Morton-2001-South China Sea.pdf	2	East Asia	China	China
887	Morton	2002	473	Morton-2002-Effects of extreme rainfall, typho.pdf	Eects of extreme rainfall, typhoons and declaration of marine reserve status on corals beached at Cape dAguilar (1998 and 1999)	Effects of extreme rainfall, typhoons and declaration of marine reserve status on corals beached at Cape d'Aguilar (1998 and 1999)	In the years 1996 and 1997, the pattern of deposition of beached coral heads and pieces onto the shore of Telecom Bay within the Cape dAguilar Marine Reserve, Hong Kong suggested that typhoons were a signi¢cant natural perturbation. In August 1997, 808 pieces weighing 60,930 g were washed up following passage of TyphoonVictor. 1997 was also Hong Kongs wettest year on record and a survey of the …	1	0	0	1	East Asia	NA	Morton-2002-Effects of extreme rainfall	1	East Asia	Hong Kong
888	Moss	2005	474	Moss-2005-Water quality guidelines for the Gre.pdf	Water quality guidelines for the Great Barrier Reef World Heritage Area: a basis for development and prelimiry values	NA	The Australian and New Zealand Guidelines for Fresh and Marine Water Quality (ANZECC Guidelines) provide default national guideline values for a wide range of indicators of relevance to the protection of the ecological condition of natural waters. However, the ANZECC Guidelines also place a strong emphasis on the need to develop more locally relevant guidelines. Using a structured framework, this…	0	1	0	1	Australia and NZ	NA	Moss-2005-Water quality guidelines for the Gre.pdf	3	Australia and NZ	Australia	Australia	Australia
893	Mumby	1999	475	Mumby-1999-Development of a systematic classif.pdf	Development of a systematic classiåcation scheme of marine habitats to facilitate regiol magement and mapping of Caribbean coral reefs	Development of a systematic classification scheme of marine habitats to facilitate regional management and mapping of Caribbean coral reefs	Most coastal habitat mapping is conducted on an ad hoc basis with little consistency in terminology and ambiguous doc- umentation. These limitations obstruct interpretation and integration of maps for coral reef science and management, particularly at regional (international) scales where standardisation is urgently required. This paper advocates an objective, systematic approach to habitat class…	0	1	0	1	Caribbean	NA	Mumby-1999-Development of a systematic classif.pdf	2	Europe	UK	UK
894	Mumby	2007	476	Mumby-2007-Thresholds and the resilience of Ca.pdf	Thresholds and the resilience of Caribbean coral reefs	Thresholds and the resilience of Caribbean coral reefs	The deteriorating health of the worlds coral reefs threatens global biodiversity, ecosystem function, and the livelihoods of millions of people living in tropical coastal regions1. Reefs in the Caribbean are among the most heavily affected2,3, having experienced mass disease-induced mortality of the herbivorous urchin Diadema antillarum4 in 1983 and two framework-building species of coral5. Decl…	0	0	1	1	Caribbean	NA	Mumby-2007-Thresholds and the resilience of Ca.pdf	3	Europe	UK	USA	UK
897	Mumby	2008	477	Mumby-2008-Coral reef habitats as surrogates o.pdf	Coral Reef Habitats as Surrogates of Species, Ecological Functions, and 4 Services	Coral reef habitats as surrogates of species, ecological functions, and ecosystem services	Habitat maps are often the core spatially consistent data set on which marine reserve networks are designed, but their efficacy as surrogates for species richness and applicability to other conservation measures is poorly understood. Combining an analysis of field survey data, literature review, and expert assessment by a multidisciplinary working group, we examined the degree to which Caribbean …	0	0	1	1	Caribbean	NA	Mumby-2008-Coral reef habitats as surrogates o.pdf	10	Europe	UK	USA	USA	USA	UK	USA	USA	USA	USA	USA
898	Mumby	2008	477	Mumby-2008-Coral reef habitats as surrogates o.pdf	Coral Reef Habitats as Surrogates of Species, Ecological Functions, and 4 Services	The impact of ecosystem connectivity on coral reef resilience	Habitat maps are often the core spatially consistent data set on which marine reserve networks are designed, but their efficacy as surrogates for species richness and applicability to other conservation measures is poorly understood. Combining an analysis of field survey data, literature review, and expert assessment by a multidisciplinary working group, we examined the degree to which Caribbean …	0	0	1	1	Caribbean	NA	Mumby-2008-Coral reef habitats as surrogates o.pdf	10	Europe	UK	USA	USA	USA	UK	USA	USA	USA	USA	USA
895	Mumby	2008	478	Mumby-2008-The impact of ecosystem connectivit.pdf	The impact of ecosystem connectivity on coral reef resilience	Coral reef habitats as surrogates of species, ecological functions, and ecosystem services	1. Ontogenetic dispersal of animals has been observed among many ecosystems, but its full ecological significance is poorly understood. By modelling the consequences of ontogenetic reef fish dispersal between Caribbean mangroves and adjacent coral reefs, we quantify the broader implications of ecosystem connectivity for ecosystem function and resilience to climate-driven disturbance. 2. Mangrove-…	0	0	1	1	Caribbean	NA	Mumby-2008-The impact of ecosystem connectivit.pdf	2	Europe	UK	USA
896	Mumby	2008	478	Mumby-2008-The impact of ecosystem connectivit.pdf	The impact of ecosystem connectivity on coral reef resilience	The impact of ecosystem connectivity on coral reef resilience	1. Ontogenetic dispersal of animals has been observed among many ecosystems, but its full ecological significance is poorly understood. By modelling the consequences of ontogenetic reef fish dispersal between Caribbean mangroves and adjacent coral reefs, we quantify the broader implications of ecosystem connectivity for ecosystem function and resilience to climate-driven disturbance. 2. Mangrove-…	0	0	1	1	Caribbean	NA	Mumby-2008-The impact of ecosystem connectivit.pdf	2	Europe	UK	USA
900	Murchie	2013	479	Murchie-2013-Movement patterns of bonefish (Al.pdf	Movement patterns of bonefish (Albula vulpes) in tidal creeks and coastal waters of Eleuthera, The Bahamas	Movement patterns of bonefish (Albula vulpes) in tidal creeks and coastal waters of Eleuthera, The Bahamas	Bonefish (Albula spp.) are a group of fishes that inhabit tropical and subtropical marine waters worldwide.Large gaps in our understanding of the ecology of these fishes exist despite their economic importanceas a sport fish and their potential role in the ecological functioning of coastal systems. Using a passiveacoustic telemetry array, we monitored the movement patterns of A. vulpes along the …	0	0	1	1	Caribbean	NA	Murchie-2013-Movement patterns of bonefish (Al.pdf	7	North America	Canada	Canada	Canada	USA	USA	USA	USA
901	Murray	2011	480	Murray-2012-Maging the marine aquarium trade.pdf	Maging the Marine Aquarium Trade: Revealing the Data Gaps Using Ormental Polychaetes	NA	The marine aquarium industry has great potential to generate jobs in low-income coastal communities creating incentives for the maintenance of a healthy coral reef, if effectively managed. In the absence of current monitoring or legislation to govern the trade, baseline information regarding the species, number and source location of animals traded is missing despite being critical for its succes…	0	0	1	1	Non-specific	NA	Murray-2012-Managing the marine aquarium trade.pdf	5	Europe	UK	UK	Italy	Italy	UK
905	Muthiga	2009	481	Muthiga-2009-Evaluating the effectiveness of m.pdf	Evaluating the effectiveness of magement of the Malindi_Watamu marine protected area complex in Kenya	Evaluating the effectiveness of management of the Malindi-Watamu marine protected area complex in Kenya	An assessment of management effectiveness of Kenyas oldest marine protected areas (Malindi and Watamu) was conducted within the framework of a regional assessment in Kenya, Seychelles and Tanzania. Biophysical, socio-economic and governance indicators were used to assess the delivery of MPA management objectives. Results indicate that the Malindi and Watamu marine parks that are no-take areas ar…	1	0	0	1	Eastern Africa	NA	Muthiga-2009-Evaluating the effectiveness of m.pdf	1	North America	USA
906	Muzuka	2010	482	Muzuka-2010-Impact of hydrographic parameters.pdf	Impact of hydrographic parameters and seasol variation in sediment fluxes on coral status at Chumbe and Bawe reefs, Zanzibar, Tanzania	Impact of hydrographic parameters and seasonal variation in sediment fluxes on coral status at Chumbe and Bawe reefs, Zanzibar, Tanzania	Coral reefs which are an important resource to coastal communities and nation at large are adversely affected by rate of sediment flux to the reefs. However, there is little information on seasonal trend in sediment flux and its impact at the reefs off Zanzibar. Two years monthly data on sedimentation at Chumbe and Bawe reefs were used to assess seasonal variability in sediment flux and its impl…	0	1	0	1	Eastern Africa	NA	Muzuka-2010-Impact of hydrographic parameters.pdf	4	East Africa	Tanzania	Tanzania	Tanzania	Tanzania
907	Mwaluma	2011	483	Mwaluma-2011-Seasolity in fish larval assemb.pdf	Seasolity in fish larval assemblage structure within marine reef tiol Parks in coastal Kenya	Seasonality in fish larval assemblage structure within marine reef National Parks in coastal Kenya	Variability of larval assemblages within marine habitats has an effect on population structure of adults, and on patchiness of populations in space and time. However, despite this effect, few studies have examined this variability in the Western Indian Ocean (WIO) especially in relation to marine park boundaries. In this study, we tested the hypothesis that seasonality and biophysical variables i…	0	0	1	1	Eastern Africa	NA	Mwaluma-2011-Seasonality in fish larval assemb.pdf	5	East Africa	Kenya	Kenya	Kenya	Kenya	Sweden
908	Mycoo	2014	484	Mycoo-2014-Sustaible tourism, climate change.pdf	Sustaible tourism, climate change and sea level rise adaptation policies in Barbados	Sustainable tourism, climate change and sea level rise adaptation policies in Barbados	The vulnerability of tourism-dependent communities, coastal tourism facilities, and beaches to climate change demands the use of measures that can urgently minimise vulnerability and in the long term achieve sustainable development. This paper makes policy recommendations to address climate change and sea level rise challenges in small island developing states. Using Barbados as a case study, the…	1	0	0	1	Caribbean	NA	Mycoo-2014-Sustainable tourism	1	Caribbean	Trinidad & Tobago
909	Myers	2009	485	Myers-2009-Coral disease in Pacific Islandsn reefs_.pdf	Coral disease in Pacific Islandsn reefs: a link between disease prevalence and host abundance	Global environmental change: The threat to human health	Current information regarding the effects of coral diseases on Indo-Pacific reefs lags behind that of the Caribbean. Considering that these reefs are geographically widespread, speciose, often highly influenced by human coastal populations, and inadequately monitored, developing a baseline database is a primary management issue for local scientists. In a first attempt to quantify diseases in Micr…	0	1	0	1	Pacific Islands	NA	Myers-2009-Coral disease in Pacific Islandsn reefs_.pdf	2	Pacific Islands	Guam	Guam
477	gelkerken	2008	486	gelkerken-2008-The habitat function of mangr.pdf	The habitat function of mangroves for terrestrial and marine fau: A review	NA	Mangroves are defined by the presence of trees that mainly occur in the intertidal zone, between land and sea, in the (sub) tropics. The intertidal zone is characterised by highly variable environmental factors, such as temperature, sedimentation and tidal currents. The aerial roots of mangroves partly stabilise this environment and provide a substratum on which many species of plants and animals…	0	0	1	1	Non-specific	NA	Nagelkerken-2008-The habitat function of mangr.pdf	11	Europe	Netherlands	Australia	Belgium	USA	Australia	Malaysia	Australia	USA	Australia	Malaysia	UK
640	jmudeen	2008	487	jmudeen-2008-Economic impact of juvenile fis.pdf	Economic impact of juvenile fishing in a tropical multi-gear multi-species fishery	NA	In open access marine fisheries, the non-targeted catches in the form of juveniles are detrimental, as this would reduce future yield and subsequent recruitment to the fishery. The proliferating impact of juvenile fishing is much more intense in a multi-gear multi-species fishery like Indian marine fisheries, where intra- and inter-sectoral conflicts exist. Marine fishing in India is contributing…	0	1	0	1	Southwest Asia	NA	Najmudeen-2008-Economic impact of juvenile fis.pdf	2	Southwest Asia	India	India
914	Nero	2005	488	Nero-2005-Characterization of tropical near-sh.pdf	Characterization of tropical near-shore fish communities by coastal habitat status on spatially complex island systems	Characterization of tropical near-shore fish communities by coastal habitat status on spatially complex island systems	We present a protocol for characterizing near-shore fish habitat as well as fish communities for Andros Island, Bahamas, a complex coastal-reef island system. Benthic assessments and beach seine surveys were carried out at sites varying in coastal and benthic characteristics. Temporal variability affected fish community composition, indicating that attempts to characterize a fish community should…	0	1	0	1	Caribbean	NA	Nero-2005-Characterization of tropical near-sh.pdf	2	North America	USA	USA
915	Nfotabong-Atheull	2011	489	Nfotabong-Atheu-2011-Assessing forest products.pdf	Assessing forest products usage and local residents perception of environmental changes in peri-urban and rural mangroves of Cameroon, Central Africa	Assessing forest products usage and local residents' perception of environmental changes in peri-urban and rural mangroves of Cameroon, Central Africa	Background: Deforestation is one of the most ubiquitous forms of land degradation worldwide. Although remote sensing and aerial photographs can supply valuable information on land/use cover changes, they may not regularly be available for some tropical coasts (e.g., Cameroon estuary) where cloud cover is frequent. With respect to mangroves, researchers are now employing local knowledge as an alte…	0	0	1	1	Middle Africa	NA	Nfotabong-Atheu-2011-Assessing forest products.pdf	6	Europe	Belgium	Cameroon	Cameroon	Belgium	Belgium	Belgium
920	Nichols	2014	490	Nichols-2014-10Be constrains the sediment sour.pdf	10Be constrains the sediment sources and sediment yields to the Great Barrier Reef from the tropical Barron River catchment, Queensland, Australia	10Be constrains the sediment sources and sediment yields to the Great Barrier Reef from the tropical Barron River catchment, Queensland, Australia	Estimates of long-term, background sediment generation rates place current and future sediment fluxes to the Great Barrier Reef in context. Without reliable estimates of sediment generation rates and without identification of the sources of sediment delivered to the reef prior to European settlement (c. 1850), determining the necessity and effectiveness of contemporary landscapemanagement efforts…	0	0	1	1	Australia and NZ	NA	Nichols-2014-10Be constrains the sediment sour.pdf	3	North America	USA	USA	UK
924	Nordlund	2013	491	Nordlund-2013-Chumbe Island Coral Park-gover.pdf	Chumbe IslandCoralParkgoverncealysis	Chumbe Island Coral Park-governance analysis	Chumbe Island Coral Park Ltd (CHICOP), established in 1991 as the first managed marine park in Tanzania, has become an international test case for sustainable private marine conservation funded by ecotourism. The experiences, problems and achievements of CHICOP are described, in particular drivers and incentives for committed on-site MPA management in the legal and institutional environment of Za…	0	0	1	1	Eastern Africa	NA	Nordlund-2013-Chumbe Island Coral Park-governa.pdf	4	East Africa	Tanzania	Tanzania	USA	Tanzania
925	Nott	2010	492	Nott-2010-Politicians and geomorphological blu.pdf	Politicians and geomorphological blunders. Some examples relating to rivers and coasts from Queensland, Australia	Politicians and geomorphological blunders. Some examples relating to rivers and coasts from Queensland, Australia	Geomorphologists have an important role to not just understand and interpret the nature of processes operating within the physical landscape, but also to communicate this information to those who can use it to benefit society. Policy makers and legislators often develop documents relating to the management and use of landforms and landscapes that contain little or no input from geomorphologists, …	1	0	0	1	Australia and NZ	NA	Nott-2010-Politicians and geomorphological blu.pdf	1	Australia and NZ	Australia
926	Nott	2012	493	Nott-2012-Punctuated global tropical cyclone a.pdf	Punctuated global tropical cyclone activity over the past 5,000 years	Punctuated global tropical cyclone activity over the past 5,000 years	[1 ] There are now a substantial number of millennial scale records of tropical cyclones from a variety of locations globally. Some of these, such as those in the Atlantic and Gulf of Mexico, show patterns of long-term, generally intense, tropical cyclone (TC) behaviour that have been suggested to be due to either variations in ENSO or shifts in the position of the Atlantic High pressure system a…	0	1	0	1	Non-specific	NA	Nott-2012-Punctuated global tropical cyclone a.pdf	2	Australia and NZ	Australia	Australia
927	Novryanto	2012	494	Novriyantoa-2012-Linking coastal community liv.pdf	Linking coastal community livelihoods to marine conservation in Aceh, Indonesia	NA	Many tropical biodiversity projects seek to combine development and conservation goals. Here, we assess the performance of a revolving fund, established by Fauna & Flora International (FFI), in delivering sustainable and equitable benefi ts to coastal community livelihood groups and individuals while ensuring that it did no apparent harm to the environment. Semi-structured interviews were conduct…	0	0	1	1	Southeast Asia	NA	Novriyantoa-2012-Linking coastal community liv.pdf	5	Southeast Asia	Indonesia	Indonesia	Indonesia	UK	UK
928	Nunes	2011	495	Nunes-2011-Long distance dispersal and connect.pdf	Long Distance Dispersal and Connectivity in Amphi- Atlantic Corals at Regiol and Basin Scales	Long distance dispersal and connectivity in Amphi-Atlantic corals at regional and basin scales	Among Atlantic scleractinian corals, species diversity is highest in the Caribbean, but low diversity and high endemism are observed in various peripheral populations in central and eastern Atlantic islands and along the coasts of Brazil and West Africa. The degree of connectivity between these distantly separated populations is of interest because it provides insight into processes at both evolu…	0	0	1	1	South America	NA	Nunes-2011-Long distance dispersal and connect.pdf	3	Europe	Switzerland	USA	USA
931	NUNN	2000	496	Nunn-2000-Coastal changes over the past 200 ye.pdf	Coastal Changes Over the Past 200 Years Around Ovalau and Moturiki Islands, Fiji: implications for coastal zone magement	NA	The islands Ovalau and Moturiki in central Fiji are selected for the investigation of coastal change over the past c.200 years. Although having coastal environments typical of many tropical Paci. c Islands, Ovalau and Moturiki are also atypical because they experienced urban and infrastructural developments before most other parts. The associated records enable recent coastal changes to be discer…	1	0	0	1	Pacific Islands	NA	Nunn-2000-Coastal changes over the past 200 ye.pdf	1	Pacific Islands	Fiji
929	Nunn	2012	497	Nunn-2012-Disruption of coastal societies in t.pdf	Disruption of coastal societies in the Pacific Islands from rapid sea-level fall about AD 1300: new evidence from northern Viti Levu Island, Fiji	Disruption of coastal societies in the Pacific Islands from rapid sea-level fall about AD 1300: New evidence from northern Viti Levu Island, Fiji	This paper reports preliminary findings of a study in northern Viti Levu Island (Fiji) intended to test the model of the AD 1300 Event. This holds that around AD 12501350, during the transition between the Medieval Warm Period and the Little Ice Age, there was a rapid climate-driven sea-level fall of 7080 cm which created a food crisis for coastal dwellers throughout the tropical Pacific Island…	1	0	0	1	Pacific Islands	NA	Nunn-2012-Disruption of coastal societies in t.pdf	1	Pacific Islands	Fiji
930	Nunn	2013	498	Nunn-2013-The end of the Pacific_ Effects of s.pdf	The end of the Pacific? Effects of sea level rise on Pacific Island livelihoods	The end of the Pacific? Effects of sea level rise on Pacific Island livelihoods	As in the past, most Pacific Island people live today along island coasts and subsist largely on foods available both onshore and offshore. On at least two occasions in the 3500 years that Pacific Islands have been settled, sea level changes affected coastal bioproductivity to the extent that island societies were transformed in consequence. Over the past 200 years, sea level has been rising alon…	1	0	0	1	Pacific Islands	NA	Nunn-2013-The end of the Pacific_ Effects of s.pdf	1	Australia and NZ	Australia
932	Nursey-Bray	2008	499	Nursey-Bray-2009-Co-magement and protected a.pdf	Co-magement andprotectedareamagement:Achievingeffective magementofacontestedsite,lessonsfromtheGreatBarrierReefWorld Heritage Area (GBRWHA)	Inter-disciplinarity as a tool for action on climate change: Applying social science methodology to climate change initiatives within local government, Australia	Marine protected management has gained acceptance as a way forward to achieve enhanced biodiversity outcomes. Simultaneously, co-management has gathered momentum as a mechanism to incorporate indigenous cultural aspirations within environmental management domains. Each management process has its own methodologies; when the two models intersect, they present a number of challenges to overall manag…	0	1	0	1	Australia and NZ	NA	Nursey-Bray-2009-Co-management and protected a.pdf	2	Australia and NZ	Australia	Australia
933	Obura	2001	500	Obura-2001-Kenya.pdf	Kenya	Kenya	The Kenya coast is bathed by the northward-flowing warm waters of the East Africa Coastal Current, located between latitudes 1 and 5° S. With a narrow continental shelf, the coastal marine environments are dominated by coral reefs, seagrass beds and mangroves, with large expanses of sandy substrates where river inputs from Kenya's two largest rivers, the Tana and Athi rivers, prevent the growth o…	1	0	0	1	Eastern Africa	NA	Obura-2001-Kenya.pdf	1	East Africa	Kenya
934	Od_riz	2014	501	OdeÌriz-2014-An altertive solution to erosion.pdf	An Altertive Solution to Erosion Problems at Punta Bete-Punta Maroma, Quinta Roo, Mexico: Conciliating Tourism and ture	NA	This paper presents an erosion problem found between Punta Bete and Punta Maroma, on the Riviera Maya, Mexico. The case is worth studying as its features are quite complex: ecologically speaking, the area contains part of the Mesoamerican barrier reef, the second largest in the world, an important area of seagrass and large mangrove fields; on the other hand regarding economic aspects, the main a…	0	1	0	1	Central America	NA	Ode?riz-2014-An alternative solution to erosion.pdf	8	Central America	Mexico	Mexico	Mexico	Mexico	Mexico	Mexico	Mexico	Mexico
936	Oigman-Pszczol	2007	502	Oigman-Pszczol-2007-Perceptions of coral in a.pdf	Perceptions of coral in a coastal tourist town in Brazil	Perceptions of coral in a coastal tourist town in Brazil	Almost nothing is known about how non-scientists in coastal communities perceive corals. This study investigated public perception at a coastal town in Brazil. Individuals were asked to respond to speciW c questions concerning their knowledge, perception, and behaviour regarding corals. Although more interviewees believed they knew what the photograph of a gorgonian was, the stony coral pictures …	0	1	0	1	South America	NA	Oigman-Pszczol-2007-Perceptions of coral in a.pdf	3	South America	Brazil	Brazil	Brazil
937	Oigman-Pszczol	2011	503	Oigman-Pszczol-2011-Can patterns in benthic co.pdf	Can patterns in benthic communities be explained by an environmental pressure index?	Can patterns in benthic communities be explained by an environmental pressure index?	Many studies have assessed in unison specific biological attributes and certain environmental impacts but few studies have analyzed multiple biological variables and pressures from multiple sites at the same time. Our studys goal was to quantify the major potential human pressures in the shallow subtidal rocky reefs along a tropical Atlantic coast; propose a relative environmental pressure index…	0	1	0	1	South America	NA	Oigman-Pszczol-2011-Can patterns in benthic co.pdf	2	South America	Brazil	Brazil
940	OLAVO	2011	504	Olavo-2011-Shelf-edge reefs as priority areas.pdf	Shelf-edge reefs as priority areas for conservation of reef fish diversity in the tropical Atlantic	NA	1. Data from fishing surveys employing bottom long-lines were analysed to characterize the diversity, assemblages and distribution patterns of demersal fish along the Brazilian outer shelf and upper slope, between latitudes 131S and 221S. 2. Non-metric multi-dimensional scaling (MDS) and cluster analysis indicate three distinct species assemblages separated primarily by depth (the 200m isobath) a…	0	1	0	1	South America	NA	Olavo-2011-Shelf-edge reefs as priority areas.pdf	4	South America	Brazil	Brazil	Brazil	Brazil
941	Olds	2014	505	Olds-2014-Marine reserves help coastal ecosyst.pdf	Marine reserves help coastal ecosystems cope with extreme weather	Marine reserves help coastal ecosystems cope with extreme weather	Natural ecosystems have experienced widespread degradation due to human activities. Consequently, enhancing resilience has become a primary objective for conservation. Nature reserves are a favored management tool, but we need clearer empirical tests of whether they can impart resilience. Catastrophic flooding in early 2011 impacted coastal ecosystems across eastern Australia. We demonstrate that…	0	1	0	1	Australia and NZ	NA	Olds-2014-Marine reserves help coastal ecosyst.pdf	6	Australia and NZ	Australia	Australia	Australia	Australia	Australia	Australia
944	Oliver	2011	506	Oliver-2011-Relating landscape development int.pdf	Relating landscape development intensity to coral reef condition in the watersheds of St. Croix, US Virgin Islands	Relating landscape development intensity to coral reef condition in the watersheds of St. Croix, US Virgin Islands	Land-based sources of pollution are a major threat to the health of coral reefs. We report, for the first time, a study that relates coral reef condition to human modifications of the landscape. Stony coral community richness, cover, colony size, and density were assessed along with 3-dimensional coral cover in the near-shore waters of St. Croix, US Virgin Islands, in 2006 and 2007. Land use/land…	0	1	0	1	Caribbean	NA	Oliver-2011-Relating landscape development int.pdf	3	North America	USA	USA	USA
946	Ooi	2014	507	Ooi-2014-Spatial structure of seagrass suggest.pdf	1 Structure of Seagrass Suggests That Size-Dependent Plant Traits Have a Strong Influence on the Distribution and Maintence of Tropical Multispecies Meadows	Spatial structure of seagrass suggests that size-dependent plant traits have a strong influence on the distribution and maintenance of tropical multispecies meadows	Background: Seagrass species in the tropics occur in multispecies meadows. How these meadows are maintained through species co-existence and what their ecological drivers may be has been an overarching question in seagrass biogeography. In this study, we quantify the spatial structure of four co-existing species and infer potential ecological processes from these structures. Methods and Results: …	0	1	0	1	Southeast Asia	NA	Ooi-2014-Spatial structure of seagrass suggest.pdf	4	Australia and NZ	Australia	Australia	Australia	Australia
[truncated: 865 more rows]
[truncated: 11 more columns]
